# Supplementary material for: Childhood obesity and adult cardiovascular disease risk factors: a systematic review with meta-analysis
Source: BMC Public Health. 2017 Aug 29;17:683. doi: 10.1186/s12889-017-4691-z (PMC5575877; doi:10.1186/s12889-017-4691-z)
Supplement: Supplementary file 5 — Excluded studies, including reasons. This file provides a reference list of all excluded studies, including the reasons for exclusion. (XLSX 900 kb) [file 12889_2017_4691_MOESM5_ESM.xlsx]

## Sheet: 5-Excluded studies with reasons
Study ID number	Author, Title, Journal	IncludExcludedd (I) or xcludExcludedd (Excluded)	Decision based on title (T) and abstract (A) OR full article (F)	Review article	Cross-sectional design	Case-cohort study	Case report	Comment	Letter	Animal study	Study published in non-English language source	Presentation from conference meeting	Unpublished study (abstracts, master thesis, dissertation, etc.)	Study in which the outcome(s) was/were self-reported	Other/Off-Topic	Additional Reasons
1	Antiretroviral therapy, fat redistribution and hyperlipidaemia in HIV-infected children in Europe. AIDS 2004;18(10):1443-51.	E	TA		X										X
2	Isolated growth hormone (GH) deficiency in adult patients: Baseline clinical characteristics and responses to GH replacement in comparison with hypopituitary patients. A sub-analysis of the KIMS database. Growth Hormone & IGF Research 2005;15(5):349-359.	E	TA												X
3	Prevalence of elevated cholesterol and associated risk factors among perinatally HIV-infected children (4-19 years old) in pediatric AIDS clinical trials group 219C. JAIDS Journal of Acquired Immune Deficiency Syndromes 2005;38(4):480-487.	E	TA												X
4	Late first-trimester placental disruption and subsequent gestational hypertension/preeclampsia. Obstetrics & Gynecology 2005;105(3):587-592.	E	TA												X
5	Cross-sectional associations of diet and insulin-like growth factor levels in 7-to 8-year-old children. Cancer Epidemiology Biomarkers & Prevention 2005;14(1):204-212.	E	TA		X										X
6	Microalbuminuria, renal function and development of sustained hypertension: a longitudinal study in the early stage of hypertension. Journal of Hypertension 2005;23(1):175-182.	E	TA												X
7	High-normal blood pressure in young adults as a risk for atherosclerosis later in life. Ann Intern Med 2008;149(2):I47.	E	Full												X
8	Microalbuminuria in adult outpatients not receiving nephrological care and with risk factors for chronic kidney disease in Peruvian nephrology departments. Nefrologia 2012;32(2):180-6.	E	TA												X
9	Children of obese mothers at greater risk of early heart death as adults. Pract Midwife 2013;16(9):10.	E	TA												X
10	Aagaard K, Petrosino J, Keitel W, Watson M, Katancik J, Garcia N, et al. The Human Microbiome Project strategy for comprehensive sampling of the human microbiome and why it matters. FASEB J 2013;27(3):1012-22.	E	TA												X
11	Aamir AH, Rehman SU, Ali SS, Jadoon MZ. Pattern of microvascular complications and associated comorbidities amongst diabetic patients at a tertiary care hospital. Journal of Postgraduate Medical Institute 2005;19(4):400-406.	E	TA												X
12	Aasvee K, Jauhiainen M, Kurvinen E, Jordania R, Sundvall J, Ehnholm C. Lipoprotein(a), apolipoprotein A-I and B serum levels in young families from Tallinn, Estonia. Relationships with other cardiovascular risk factors and nationality. Scand J Clin Lab Invest 1999;59(3):179-89.	E	TA												X
13	Aasvee K, Kurvinen E, Jordania R, Jauhiainen M, Sundvall J. Lipoprotein parameters in relation to other risk factors of atherosclerosis in adults and newborns: Tallinn Young Family Study. Scand J Clin Lab Invest 2004;64(3):245-53.	E	TA												X
14	Aatola H, Hutri-Kahonen N, Juonala M, Laitinen TT, Pahkala K, Mikkila V, et al. Prospective relationship of change in ideal cardiovascular health status and arterial stiffness: the Cardiovascular Risk in Young Finns Study. J Am Heart Assoc 2014;3(2):e000532.	E	TA												X
15	Aatola H, Hutri-Kahonen N, Juonala M, Viikari JS, Hulkkonen J, Laitinen T, et al. Lifetime risk factors and arterial pulse wave velocity in adulthood: the cardiovascular risk in young Finns study. Hypertension 2010;55(3):806-11.	E	TA												X
16	Aatola H, Koivistoinen T, Hutri-Kähönen N, Juonala M, Mikkilä V, Lehtimäki T, et al. Lifetime fruit and vegetable consumption and arterial pulse wave velocity in adulthood: The cardiovascular risk in young finns study. Circulation 2010;122(24):2521-2528.	E	TA												X
17	Abate NI, Mansour YH, Tuncel M, Arbique D, Chavoshan B, Kizilbash A, et al. Overweight and sympathetic overactivity in black Americans. Hypertension 2001;38(3):379-383.	E	TA												X
18	Abd El Dayem SM, Battah AA. Hypertension in type 1 diabetic patients-the influence of body composition and body mass index: An observational study. Anadolu Kardiyoloji Dergisi 2012;12(1):60-64.	E	F		X
19	Abdelghaffar S, El Amir M, El Hadidi A, El Mougi F. Carotid intima-media thickness: an index for subclinical atherosclerosis in type 1 diabetes. J Trop Pediatr 2006;52(1):39-45.	E	TA												X
20	Abdi L, Sahnoun-Fathallah M, Morange I, Albarel F, Castinetti F, Giorgi R, et al. A monocentric experience of growth hormone replacement therapy in adult patients. Annales d'Endocrinologie 2014;75(3):179-186.	E	TA												X
21	Abdou NI, Kullman GJ, Hoffman GS, Sharp GC, Specks U, McDonald T, et al. Wegener's granulomatosis: Survey of 701 patients in North America. Changes in outcome in the 1990s. Journal of Rheumatology 2002;29(2):309-316.	E	TA												X
22	Abe J, Ebata R, Jibiki T, Yasukawa K, Saito H, Terai M. Elevated granulocyte colony-stimulating factor levels predict treatment failure in patients with Kawasaki disease. Journal of Allergy and Clinical Immunology 2008;122(5):1008-1013.	E	TA												X
23	Abellan Aleman J, Martinez Garcia JF, Merino Sanchez J, Gil Guillen V, Latorre Hernandez J, Fernandez Montero F, et al. [Evaluation of psychosomatic symptomatology in hypertensive patients treated with lercanidipine (LERCAPSICO study)]. An Med Interna 2003;20(6):287-91.	E	TA												X
24	Abitbol CL, Chandar J, Rodríguez MM, Berho M, Seeherunvong W, Freundlich M, et al. Obesity and preterm birth: Additive risks in the progression of kidney disease in children. Pediatric Nephrology 2009;24(7):1363-1370.	E	TA												X
25	Abou-Mourad YR, Lau BC, Barnett MJ, Forrest DL, Hogge DE, Nantel SH, et al. Long-term outcome after allo-SCT: close follow-up on a large cohort treated with myeloablative regimens. Bone Marrow Transplantation 2010;45(2):295-302.	E	TA												X
26	Abs R, Mattsson AF, Bengtsson BA, Feldt-Rasmussen U, Goth MI, Koltowska-Haggstrom M, et al. Isolated growth hormone (GH) deficiency in adult patients: baseline clinical characteristics and responses to GH replacement in comparison with hypopituitary patients. A sub-analysis of the KIMS database. Growth Horm IGF Res 2005;15(5):349-59.	E	TA												X
27	Abu Hanifah R, Mohamed MNA, Jaafar Z, Mohsein NA-SA, Jalaludin MY, Majid HA, et al. The Correlates of Body Composition with Heart Rate Recovery after Step Test: An Exploratory Study of Malaysian Adolescents. Plos One 2013;8(12).	E	TA												X
28	Abu-Rmeileh NM, Hart CL, McConnachie A, Upton MN, Lean ME, Watt GC. Contribution of Midparental BMI and other determinants of obesity in adult offspring. Obesity (Silver Spring) 2008;16(6):1388-93.	E	TA												X
29	Aburawi EH, Grubb A, Raitakari OT, Viikari J, Pesonen EJ. Lowered levels of serum albumin and HDL-cholesterol in children with a recent mild infection. Ann Med 2006;38(2):154-60.	E	TA												X
30	Abushufa R, Reed P, Weinkove C, Wales S, Shaffer J. Essential fatty acid status in patients on long-term home parenteral nutrition. JPEN J Parenter Enteral Nutr 1995;19(4):286-90.	E	TA												X
31	Achelrod D, Blankart CR, Linder R, von Kodolitsch Y, Stargardt T. The economic impact of Marfan syndrome: a non-experimental, retrospective, population-based matched cohort study. Orphanet Journal of Rare Diseases 2014;9.	E	TA												X
32	Ackermann RT, Finch EA, Schmidt KK, Hoen HM, Hays LM, Marrero DG, et al. Rationale, design, and baseline characteristics of a community-based comparative effectiveness trial to prevent type 2 diabetes in economically disadvantaged adults: The RAPID Study. Contemporary Clinical Trials 2014;37(1):1-9.	E	TA												X
33	Acosta S, Ogren M, Sternby NH, Bergqvist DB, Bjorck M. Mesenteric venous thrombosis with transmural intestinal infarction: A population-based study. Journal of Vascular Surgery 2005;41(1):59-63.	E	TA												X
34	Adair LS, Fall CH, Osmond C, Stein AD, Martorell R, Ramirez-Zea M, et al. Associations of linear growth and relative weight gain during early life with adult health and human capital in countries of low and middle income: findings from five birth cohort studies. Lancet 2013;382(9891):525-34.	E	Full												X	Pooled Data
35	Adair LS, Martorell R, Stein AD, Hallal PC, Sachdev HS, Prabhakaran D, et al. Size at birth, weight gain in infancy and childhood, and adult blood pressure in 5 low- and middle-income-country cohorts: when does weight gain matter? Am J Clin Nutr 2009;89(5):1383-92.	E	Full												X	Pooled Data
36	Adam MP, Schelley S, Gallagher R, Brady AN, Barr K, Blumberg B, et al. Clinical features and management issues in Mowat-Wilson syndrome. American Journal of Medical Genetics Part A 2006;140A(24):2730-2741.	E	TA												X
37	Adami GF, Camerini GG, Ravera NS, Marinari GM. Metabolic syndrome in severely obese patients. Obesity Surgery 2001;11(5):543-545.	E	TA												X	retrospective analysis: partcipants age 18-67. Special Population
38	Adams LA, Feldstein A, Lindor KD, Angulo P. Nonalcoholic fatty liver disease among patients with hypothalamic and pituitary dysfunction. Hepatology 2004;39(4):909-14.	E	TA												X
39	Adams LA, White SW, Marsh JA, Lye SJ, Connor KL, Maganga R, et al. Association between liver-specific gene polymorphisms and their expression levels with nonalcoholic fatty liver disease. Hepatology 2013;57(2):590-600.	E	TA												X
40	Adams RJ, Appleton SL, Hill CL, Wilson DH, Taylor AW, Chittleborough CR, et al. Independent association of HbA(1c) and incident cardiovascular disease in people without diabetes. Obesity (Silver Spring) 2009;17(3):559-63.	E	TA												X
41	Adams TD, Hammoud AO, Davidson LE, Laferrere B, Fraser A, Stanford JB, et al. Maternal and neonatal outcomes for pregnancies before and after gastric bypass surgery. International Journal of Obesity 2015;39(4):686-694.	E	TA												X
42	Adams TD, Heath EM, LaMonte MJ, Gress RE, Pendleton R, Strong M, et al. The relationship between body mass index and per cent body fat in the severely obese. Diabetes Obes Metab 2007;9(4):498-505.	E	TA												X
43	Adas H, Al-Ramahi R, Jaradat N, Badran R. Assessment of adequacy of hemodialysis dose at a Palestinian hospital. Saudi J Kidney Dis Transpl 2014;25(2):438-42.	E	TA												X
44	Adediran OS, Adebayo PB, Akintunde AA. Anthropometric differences among natives of Abuja living in urban and rural communities: Correlations with other cardiovascular risk factors. BMC Research Notes 2013;6(1).	E	TA												X
45	Adekile AD. LIMITATIONS OF Hb F AS A PHENOTYPIC MODIFIER IN SICKLE CELL DISEASE: STUDY OF KUWAITI ARAB PATIENTS. Hemoglobin 2011;35(5-6):607-617.	E	TA												X
46	Adeyanju M. Adolescent health status, behaviors and cardiovascular disease. Adolescence 1990;25(97):155-69.	E	TA												X
47	Adkison KK, Shachoy-Clark A, Fang L, Lou Y, Otto VR, Berrey MM, et al. The effects of ritonavir and lopinavir/ritonavir on the pharmacokinetics of a novel CCR5 antagonist, aplaviroc, in healthy subjects. British Journal of Clinical Pharmacology 2006;62(3):336-344.	E	TA												X
48	Afsharpaiman S, Saburi A, Waters KA. Respiratory difficulties and breathing disorders in achondroplasia. Paediatric Respiratory Reviews 2013;14(4):250-255.	E	TA												X
49	Afzali B, Bakri RS, Bharma-Ariza P, Lumb PJ, Dalton N, Turner NC, et al. Raised plasma total sialic acid levels are markers of cardiovascular disease in renal dialysis patients. Journal of Nephrology 2003;16(4):540-545.	E	TA												X
50	Agarwal G, Sadacharan D, Aggarwal V, Chand G, Mishra A, Agarwal A, et al. Surgical management of organ-contained unilateral pheochromocytoma: comparative outcomes of laparoscopic and conventional open surgical procedures in a large single-institution series. Langenbecks Arch Surg 2012;397(7):1109-16.	E	TA												X
51	Agarwal R. People with Chronic Kidney Disease Should Have a Blood Pressure Lower than 130/80 mm Hg Debate: CON Position. American Journal of Nephrology 2010;32(4):374-376.	E	TA												X
52	Ageno W, Becattini C, Brighton T, Selby R, Kamphuisen PW. Cardiovascular risk factors and venous thromboembolism: a meta-analysis. Circulation 2008;117(1):93-102.	E	TA												X
53	Agirbasli M, Eren F, Agirbasli D, White MJ, Williams SM. Multi-Locus Candidate Gene Analyses of Lipid Levels in a Pediatric Turkish Cohort: Lessons Learned on LPL, CETP, LIPC, ABCA1, and SHBG. Omics-a Journal of Integrative Biology 2013;17(12):636-645.	E	TA												X
54	Agius AM, Jones NS, Muscat R. Prospective three-year follow up of a cohort study of 240 patients with chronic facial pain. Journal of Laryngology and Otology 2014;128(6):518-526.	E	TA												X
55	Agostoni C, Baselli L, Mazzoni MB. Early nutrition patterns and diseases of adulthood: a plausible link? Eur J Intern Med 2013;24(1):5-10.	E	TA												X
56	Aguilar-Salinas CA, García E, Robles L, Riaño D, Ruiz-Gomez DG, García-Ulloa AC, et al. High adiponectin concentrations are associated with the metabolically healthy obese phenotype. Journal of Clinical Endocrinology and Metabolism 2008;93(10):4075-4079.	E	TA												X
57	Ahlehoff O, Gislason GH, Charlot M, Jorgensen CH, Lindhardsen J, Olesen JB, et al. Psoriasis is associated with clinically significant cardiovascular risk: a Danish nationwide cohort study. Journal of Internal Medicine 2011;270(2):147-157.	E	TA												X
58	Ahluwalia J, Singh S, Naseem S, Suri D, Rawat A, Gupta A, et al. Antiphospholipid antibodies in children with systemic lupus erythematosus: a long-term clinical and laboratory follow-up status study from northwest India. Rheumatology International 2014;34(5):669-673.	E	TA												X
59	Ahmad F, Kavey REW, Kveselis DA, Gaum WE, Smith FC. Responses of non-obese white children to treadmill exercise. Journal of Pediatrics 2001;139(2):284-290.	E	TA												X
60	Ahmad I, Zhan M, Miller M. High prevalence of C-reactive protein elevation with normal triglycerides (100-149 mg/dL): Are triglyceride levels below 100 mg/ dL more optimal in coronary heart disease risk assessment? American Journal of the Medical Sciences 2005;329(4):173-177.	E	TA												X
61	Ahmad T, Geffner M, Parks J, Brown M, Fisher L, Costin G. Short stature and metabolic abnormalities in two sisters with a 7.6-kb GH1 gene deletion. Growth Horm IGF Res 2011;21(1):37-43.	E	TA												X
62	Ahnis A, Figura A, Hofmann T, Stengel A, Elbelt U, Klapp BF. Surgically and conservatively treated obese patients differ in psychological factors, regardless of body mass index or obesity-related co-morbidities: A comparison between groups and an analysis of predictors. PLoS ONE 2015;10(2).	E	TA												X
63	Ajala O, Hosking J, Metcalf BS, Jeffery AN, Voss LD, Wilkin TJ. The contribution of parental BMI to the metabolic health of their offspring: a longitudinal cohort study (EarlyBird 55). Pediatr Obes 2012;7(2):143-50.	E	TA												X
64	Akahoshi M, Soda M, Carter RL, Nakashima E, Shimaoka K, Seto S, et al. Correlation between systolic blood pressure and physical development in adolescence. American Journal of Epidemiology 1996;144(1):51-58.	E	TA												X
65	Akbaraly TN, Ferrie JE, Berr C, Brunner EJ, Head J, Marmot MG, et al. Alternative Healthy Eating Index and mortality over 18 y of follow-up: results from the Whitehall II cohort. American Journal of Clinical Nutrition 2011;94(1):247-253.	E	TA												X
66	Akdemir N, Cinemre H, Bilir C, Akin O, Akdemir R. Increased serum asymmetric dimethylarginine levels in primary dysmenorrhea. Gynecol Obstet Invest 2010;69(3):153-6.	E	TA												X
67	Akerblom HK, Viikari J, Rasanen L, Kuusela V, Uhari M, Lautala P. Cardiovascular risk in young Finns, results from the second follow-up study. Ann Med 1989;21(3):223-5.	E	Full		X										X	No link between BMI and cholesterol
68	Akhter T, Larsson A, Larsson M, Wikstrom AK, Naessen T. Artery wall layer dimensions during normal pregnancy: a longitudinal study using noninvasive high-frequency ultrasound. Am J Physiol Heart Circ Physiol 2013;304(2):H229-34.	E	TA												X
69	Al Junaibi A, Abdulle A, Sabri S, Hag-Ali M, Nagelkerke N. The prevalence and potential determinants of obesity among school children and adolescents in Abu Dhabi, United Arab Emirates. Int J Obes (Lond) 2013;37(1):68-74.	E	TA												X
70	Al Sadat N, Jalaluddin MYB, Majid HA, Kamar N, Su TT. Myhearts - risk factors for chronic non-communicable diseases among adolescents. Journal of the University of Malaya Medical Centre 2013;16(SPECIAL):59-60.	E	F												X
71	Al-Attas OS, Al-Daghri NM, Alokail MS, Alkharfy KM, Alfadda AA, McTernan P, et al. Circulating leukocyte telomere length is highly heritable among families of Arab descent. BMC Med Genet 2012;13:38.	E	TA												X
72	Al-Attas OS, Al-Daghri NM, Alokail MS, Alkharfy KM, Draz H, Yakout S, et al. Association of body mass index, sagittal abdominal diameter and waist-hip ratio with cardiometabolic risk factors and adipocytokines in Arab children and adolescents. BMC Pediatr 2012;12:119.	E	F		X
73	Al-Bustan SA, Al-Serri AE, Annice BG, Alnaqeeb MA, Ebrahim GA. Re-sequencing of the APOAI promoter region and the genetic association of the -75G > A polymorphism with increased cholesterol and low density lipoprotein levels among a sample of the Kuwaiti population. BMC Med Genet 2013;14:90.	E	TA												X
74	Al-Daghri NM. Extremely high prevalence of metabolic syndrome manifestations among Arab youth: a call for early intervention. Eur J Clin Invest 2010;40(12):1063-6.	E	TA												X
75	Al-Daghri NM, Al-Attas OS, Alokail MS, Alkharfy KM, El-Kholie E, Yousef M, et al. Increased vitamin D supplementation recommended during summer season in the gulf region: a counterintuitive seasonal effect in vitamin D levels in adult, overweight and obese Middle Eastern residents. Clin Endocrinol (Oxf) 2012;76(3):346-50.	E	TA												X
76	Al-Daghri NM, Al-Attas OS, Alokail MS, Alkharfy KM, Sabico SL, Chrousos GP. Decreasing prevalence of the full metabolic syndrome but a persistently high prevalence of dyslipidemia among adult Arabs. PLoS One 2010;5(8):e12159.	E	F		X
77	Al-Daghri NM, Al-Attas OS, Alokail MS, Alkharfy KM, Yakout SM, Sabico SB, et al. Parent-offspring transmission of adipocytokine levels and their associations with metabolic traits. PLoS One 2011;6(4):e18182.	E	TA												X
78	Al-Daghri NM, Al-Attas OS, Alokail MS, Alkharfy KM, Yousef M, Nadhrah HM, et al. Hypovitaminosis D and cardiometabolic risk factors among non-obese youth. Central European Journal of Medicine 2010;5(6):752-757.	E	TA												X
79	Al-Daghri NM, Al-Attas OS, Alokail MS, Alkharfy KM, Yousef M, Sabico SL, et al. Diabetes mellitus type 2 and other chronic non-communicable diseases in the central region, Saudi Arabia (Riyadh cohort 2): a decade of an epidemic. BMC Med 2011;9:76.	E	F		X
80	Al-Daghri NM, Al-Attas OS, Alokail MS, Alkharfy KM, Yousef M, Vinodson B, et al. Maternal inheritance of circulating irisin in humans. Clin Sci (Lond) 2014;126(12):837-44.	E	TA												X
81	Al-Daghri NM, Aljohani NJ, Al-Attas OS, Al-Saleh Y, Wani K, Alnaami AM, et al. Non-high-density lipoprotein cholesterol and other lipid indices vs elevated glucose risk in Arab adolescents. Journal of Clinical Lipidology 2015;9(1):35-41.	E	F		X
82	Al-Daghri NM, Alkharfy KM, Al-Saleh Y, Al-Attas OS, Alokail MS, Al-Othman A, et al. Modest reversal of metabolic syndrome manifestations with vitamin D status correction: a 12-month prospective study. Metabolism 2012;61(5):661-6.	E	TA												X
83	Al-Daghri NM, Alkharfy KM, Rahman S, Amer OE, Vinodson B, Sabico S, et al. Irisin as a predictor of glucose metabolism in children: sexually dimorphic effects. Eur J Clin Invest 2014;44(2):119-24.	E	TA												X
84	Al-Disi D, Al-Daghri N, Khanam L, Al-Othman A, Al-Saif M, Sabico S, et al. Subjective sleep duration and quality influence diet composition and circulating adipocytokines and ghrelin levels in teen-age girls. Endocrine Journal 2010;57(10):915-923.	E	TA												X
85	Al-Hassnan ZN, Almesned AR, Tulbah S, Hakami A, Al-Omrani A, Al Sehly A, et al. Recessively Inherited Severe Aortic Aneurysm Caused by Mutated EFEMP2. American Journal of Cardiology 2012;109(11):1677-1680.	E	TA												X
86	Al-Nozah M, Al-Daghri N, Bartlett WA, Al-Attas O, Al-Maatouq M, Martin SC, et al. Serum homocysteine concentration is related to diabetes mellitus, but not to coronary heart disease, in Saudi Arabians. Diabetes Obes Metab 2002;4(2):118-23.	E	TA												X
87	al-Nuaim AR, Mirdad S, al-Rubeaan K, al-Mazrou Y, al-Attas O, al-Daghari N, et al. Population-based epidemiological study on characteristics of risk factors of hypercholesterolemia in Saudi Arabia. Int J Cardiol 1997;62(1):47-54.	E	TA		X
88	Al-Saleh Y, Al-Daghri NM, Alkharfy KM, Al-Attas OS, Alokail MS, Al-Othman A, et al. Normal circulating PTH in Saudi healthy individuals with hypovitaminosis D. Horm Metab Res 2013;45(1):43-6.	E	TA												X
89	Alam N, Cortina-Borja M, Goetghebuer T, Marczynska M, Vigano A, Thorne C. Body fat abnormality in HIV-infected children and adolescents living in europe: Prevalence and risk factors. Journal of Acquired Immune Deficiency Syndromes 2012;59(3):314-324.	E	TA												X
90	Alastalo H, Raikkonen K, Pesonen AK, Osmond C, Barker DJ, Heinonen K, et al. Early life stress and blood pressure levels in late adulthood. J Hum Hypertens 2013;27(2):90-4.	E	TA												X
91	Alastalo H, Räikkönen K, Pesonen AK, Osmond C, Barker DJP, Kajantie E, et al. Cardiovascular health of Finnish war evacuees 60 years later. Annals of Medicine 2009;41(1):66-72.	E	TA												X
92	Alastalo H, von Bonsdorff MB, Raikkonen K, Pesonen A-K, Osmond C, Barker DJP, et al. Early Life Stress and Physical and Psychosocial Functioning in Late Adulthood. Plos One 2013;8(7).	E	TA												X
93	Alatupa S, Pulkki-Råback L, Hintsanen M, Ravaja N, Raitakari OT, Telama R, et al. School performance as a predictor of adulthood obesity: A 21-year follow-up study. European Journal of Epidemiology 2010;25(4):267-274.	E	TA												X
94	Albanese E, Hardy R, Wills A, Kuh D, Guralnik J, Richards M. No association between gain in body mass index across the life course and midlife cognitive function and cognitive reserve - The 1946 British birth cohort study. Alzheimer's and Dementia 2012;8(6):470-482.	E	TA												X
95	Albanil Ballesteros M, Sanchez Martin M, de la Torre Verdu M, Olivas Dominguez A, Sanchez Mendez M, Sanz Cuesta T. [Prevalence of obesity in 14-year-olds in four primary care centers. Trends in weight changes since the age of two years old]. An Pediatr (Barc) 2005;63(1):39-44.	E	TA												X	Data on ages 2,3,4,6,8,11 and 14 years
96	Albanil Ballesteros MR, Rogero Blanco ME, Olivas Dominguez A, Sanchez Martin M, Rabanal Basalo A, Sanz Bayona MT. [Obesity and cardiovascular risk factors in adolescents. Association with cardiovascular risk factors in first degree relatives]. Med Clin (Barc) 2012;138(7):283-8.	E	TA								Spanish					data upto 18 years of age
97	Alcacera MA, Marques-Lopes I, Fajo-Pascual M, Foncillas JP, Carmona-Torre F, Martinez-Gonzalez MA. Alcoholic beverage preference and dietary pattern in Spanish university graduates: the SUN cohort study. Eur J Clin Nutr 2008;62(10):1178-86.
98	Alcaraz Quevedo M, Anton Pascual C, Bonet Pla A, Calabuig Perez J, Jimenez Cruzado L, Navarro Perez J, et al. [An episode of the prevention of cardiovascular risk factors by age and sex in the Community of Valencia]. Aten Primaria 1999;23(7):411-8.	E	TA								Spanish
99	Alder J, Fink N, Lapaire O, Urech C, Meyer A, Bitzer J, et al. The effect of migration background on obstetric performance in Switzerland. European Journal of Contraception and Reproductive Health Care 2008;13(1):103-108.	E	TA												X
100	Alderaan K, Sekicki V, Magder LS, Petri M. Risk factors for cataracts in systemic lupus erythematosus (SLE). Rheumatology International 2015;35(4):701-708.	E	TA												X
101	Alemzadeh R, Kichler J. Parathyroid hormone is associated with biomarkers of insulin resistance and inflammation, independent of vitamin D status, in obese adolescents. Metab Syndr Relat Disord 2012;10(6):422-9.	E	TA												X
102	Alemzadeh R, Kichler J. Gender differences in the association of insulin resistance and high-sensitivity c-reactive protein in obese adolescents. Journal of Diabetes and Metabolic Disorders 2014;13(1).	E	TA												X
103	Alesci RS, Krekeler S, Seifried E, Miesbach W. Do patients with haemophilia and von Willebrand disease with arterial hypertension have bleeding complications: a German single centre cohort. Blood Coagulation & Fibrinolysis 2012;23(4):320-323.	E	TA												X
104	Alexander BT, Ojeda NB. Slow prenatal growth and accelerated postnatal growth: Critical influences on adult blood pressure. Hypertension 2008;52(4):613-614.	E	F					X
105	Alexopoulos EI, Gletsou E, Kostadima E, Kaditis D, Zakynthinos E, Gourgoulianis K, et al. Effects of obstructive sleep apnea severity on serum lipid levels in Greek children with snoring. Sleep Breath 2011;15(4):625-31.	E	TA												X
106	Alexy U, Sichert-Hellert W, Kersting M. Associations between intake of added sugars and intakes of nutrients and food groups in the diets of German children and adolescents. Br J Nutr 2003;90(2):441-7.	E	TA												X
107	Ali FN, Falkner B, Gidding SS, Price HE, Keith SW, Langman CB. Fibroblast growth factor-23 in obese, normotensive adolescents is associated with adverse cardiac structure. Journal of Pediatrics 2014;165(4):738-743.e1.	E	TA												X
108	Ali O, Cerjak D, Kent JW, Jr., James R, Blangero J, Carless MA, et al. An epigenetic map of age-associated autosomal loci in northern European families at high risk for the metabolic syndrome. Clin Epigenetics 2015;7(1):12.	E	TA												X
109	Ali O, Cerjak D, Kent JW, Jr., James R, Blangero J, Zhang Y. Obesity, central adiposity and cardiometabolic risk factors in children and adolescents: a family-based study. Pediatr Obes 2014;9(3):e58-62.	E	TA												X
110	Alibrahim E, Donaghue KC, Rogers S, Hing S, Jenkins AJ, Chan A, et al. Retinal vascular caliber and risk of retinopathy in young patients with type 1 diabetes. Ophthalmology 2006;113(9):1499-503.	E	TA												X
111	Alkhouri N, Berk M, Yerian L, Lopez R, Chung Y-M, Zhang R, et al. OxNASH Score Correlates with Histologic Features and Severity of Nonalcoholic Fatty Liver Disease. Digestive Diseases and Sciences 2014;59(7):1617-1624.	E	TA												X
112	Allamani M, Sennesael J, Vendemeulenbroucke E. Posttransplantation diabetes mellitus: A long-term retrospective cohort study. Transplantation Proceedings 2010;42(10):4378-4383.	E	TA												X
113	Allard C, Desgagné V, Patenaude J, Lacroix M, Guillemette L, Battista MC, et al. Mendelian randomization supports causality between maternal hyperglycemia and epigenetic regulation of leptin gene in newborns. Epigenetics 2015;10(4):342-351.	E	TA												X
114	Allen GE, Brown SGA, Buckley NA, O'Leary MA, Page CB, Currie BJ, et al. Clinical Effects and Antivenom Dosing in Brown Snake (Pseudonaja spp.) Envenoming - Australian Snakebite Project (ASP-14). Plos One 2012;7(12).	E	TA												X
115	Allen JK, Blumenthal RS. Risk factors in the offspring of women with premature coronary heart disease. Am Heart J 1998;135(3):428-34.	E	TA												X
116	Allen KL, Mori TA, Beilin L, Byrne SM, Hickling S, Oddy WH. Dietary intake in population-based adolescents: support for a relationship between eating disorder symptoms, low fatty acid intake and depressive symptoms. J Hum Nutr Diet 2013;26(5):459-69.	E	TA												X
117	Alleyn CR, Volkening LK, Wolfson J, Rodriguez-Ventura A, Wood JR, Laffel LM. Occurrence of microalbuminuria in young people with Type 1 diabetes: importance of age and diabetes duration. Diabet Med 2010;27(5):532-7.	E	TA												X
118	Allison DB, Zannolli R, Faith MS, Heo M, Pictrobelli A, Vanitallie TB, et al. Weight loss increases and fat loss decreases all-cause mortality rate: Results from two independent cohort studies. International Journal of Obesity 1999;23(6):603-611.	E	TA												X
119	Almgren M, Atkinson RL, Hilding A, He J, Brismar K, Schalling M, et al. Human adenovirus-36 is uncommon in type 2 diabetes and is associated with increased insulin sensitivity in adults in Sweden. Annals of Medicine 2014;46(7):539-546.	E	TA												X
120	AlNuaim AR, Mirdad S, AlRubeaan K, AlMazrou Y, AlAttas O, AlDaghari N, et al. Population-based epidemiological study on characteristics of risk factors of hypercholesterolemia in Saudi Arabia. International Journal of Cardiology 1997;62(1):47-54.	E	F		X
121	Alomari AI, Orbach DB, Mulliken JB, Bisdorff A, Fishman SJ, Norbash A, et al. Klippel-Trenaunay Syndrome and Spinal Arteriovenous Malformations: An Erroneous Association. American Journal of Neuroradiology 2010;31(9):1608-1612.	E	TA												X
122	Alperin N, Lam BL, Tain R-W, Ranganathan S, Letzing M, Bloom M, et al. Evidence for altered spinal canal compliance and cerebral venous drainage in untreated idiopathic intracranial hypertension. Acta neurochirurgica. Supplement 2012;114:201-5.	E	TA												X
123	Alperin N, Ranganathan S, Bagci AM, Adams DJ, Ertl-Wagner B, Saraf-Lavi E, et al. MRI evidence of impaired CSF homeostasis in obesity-associated idiopathic intracranial hypertension. American Journal of Neuroradiology 2013;34(1):29-34.	E	TA												X
124	Alsheikh-Ali AA, Omar MI, Raal FJ, Rashed W, Hamoui O, Kane A, et al. Cardiovascular risk factor burden in Africa and the Middle East: The Africa Middle East Cardiovascular Epidemiological (ACE) study. PLoS ONE 2014;9(8).	E	F		X
125	Altaf A, Halim A, Khan DA, Khalid M, Fatima Tuz Z, Saif I. Assessment of lipid dysfunction in patients on maintenance haemodialysis. J Ayub Med Coll Abbottabad 2007;19(4):32-6.	E	TA												X
126	Altenburg TM, Lakerveld J, Bot SD, Nijpels G, Chinapaw MJ. The prospective relationship between sedentary time and cardiometabolic health in adults at increased cardiometabolic risk - the Hoorn Prevention Study. Int J Behav Nutr Phys Act 2014;11:90.	E	TA												X
127	Althuis MD, Weed DL. Evidence mapping: methodologic foundations and application to intervention and observational research on sugar-sweetened beverages and health outcomes. American Journal of Clinical Nutrition 2013;98(3):755-768.	E	TA												X
128	Altorf-Van Der Kuil W, Engberink MF, Ijpma I, Verberne LDM, Toeller M, Chaturvedi N, et al. Protein intake in relation to risk of hypertension and microalbuminuria in patients with type 1 diabetes: The EURODIAB Prospective Complications Study. Journal of Hypertension 2013;31(6):1151-1159.	E	TA												X
129	Altwaijri YA, Day RS, Harrist RB, Dwyer JT, Ausman LM, Labarthe DR. Sexual maturation affects diet-blood total cholesterol association in children: Project HeartBeat! Am J Prev Med 2009;37(1 Suppl):S65-70.	E	TA												X
130	Alvarez Li FC, Espinosa Brito AD, Ordunez Garcia PO, Silva Aycaguer LC. [Risk markers and high blood pressure. The Cienfuegos global project. Longitudinal study 1992-1994]. Rev Invest Clin 1999;51(3):151-8.	E	TA								Spanish
131	Alvarez-Nemegyei J, Cen-Pisté JC, Medina-Escobedo M, Villanueva-Jorge S. Factors associated with musculoskeletal disability and chronic renal failure in clinically diagnosed primary gout. Journal of Rheumatology 2005;32(10):1923-1927.	E	TA												X
132	Alves E, Azevedo A, Rodrigues T, Santos AC, Barros H. Impact of risk factors on hypertensive disorders in pregnancy, in primiparae and multiparae. Ann Hum Biol 2013;40(5):377-84.	E	TA												X
133	Alves E, Henriques A, Correia S, Santos AC, Azevedo A, Barros H. Cardiovascular risk profile of mothers of a Portuguese birth cohort: a survey 4 years after delivery. Prev Med 2013;57(5):494-9.	E	TA												X
134	Alves E, Lunet N, Correia S, Morais V, Azevedo A, Barros H. Medical record review to recover missing data in a Portuguese birth cohort: agreement with self-reported data collected by questionnaire and inter-rater variability. Gac Sanit 2011;25(3):211-9.	E	TA												X
135	Alwan NA, Cade JE, Greenwood DC, Deanfield J, Lawlor DA. Associations of maternal iron intake and hemoglobin in pregnancy with offspring vascular phenotypes and adiposity at age 10: findings from the Avon Longitudinal Study of Parents and Children. PLoS One 2014;9(1):e84684.	E	TA												X
136	Amaral B, Murphy G, Ioannou Y, Isenberg DA. A comparison of the outcome of adolescent and adult-onset systemic lupus erythematosus. Rheumatology 2014;53(6):1130-1135.	E	TA												X
137	Amaya RA, Kozinetz CA, McMeans A, Schwarzwald H, Kline MW. Lipodystrophy syndrome in human immunodeficiency virus-infected children. Pediatric Infectious Disease Journal 2002;21(5):405-410.	E	TA												X
138	Ambler C, Eliakim A, Brasel JA, Lee WN, Burke G, Cooper DM. Fitness and the effect of exercise training on the dietary intake of healthy adolescents. Int J Obes Relat Metab Disord 1998;22(4):354-62.	E	TA												X
139	Ambrosini GL, de Klerk NH, O'Sullivan TA, Beilin LJ, Oddy WH. The reliability of a food frequency questionnaire for use among adolescents. European Journal of Clinical Nutrition 2009;63(10):1251-1259.	E	TA												X
140	Ambrosini GL, Emmett PM, Northstone K, Howe LD, Tilling K, Jebb SA. Identification of a dietary pattern prospectively associated with increased adiposity during childhood and adolescence. Int J Obes (Lond) 2012;36(10):1299-305.	E	TA												X
141	Ambrosini GL, Huang RC, Mori TA, Hands BP, O'Sullivan TA, de Klerk NH, et al. Dietary patterns and markers for the metabolic syndrome in Australian adolescents. Nutr Metab Cardiovasc Dis 2010;20(4):274-83.	E	TA												X
142	Ambrosini GL, Oddy WH, Huang RC, Mori TA, Beilin LJ, Jebb SA. Prospective associations between sugar-sweetened beverage intakes and cardiometabolic risk factors in adolescents. Am J Clin Nutr 2013;98(2):327-34.	E	TA												X
143	Ambrosini GL, Oddy WH, Huang RC, Mori TA, Beilin LJ, Jebb SA. Spective associations between sugar-sweetened beverage intakes and cardiometabolic risk factors in adolescents. American Journal of Clinical Nutrition 2013;98(2):327-334.	E	TA												X
144	Amorosa V, Synnestvedt M, Gross R, Friedman H, MacGregor RR, Gudonis D, et al. A tale of 2 epidemics - The intersection between obesity and HIV infection in Philadelphia. Jaids-Journal of Acquired Immune Deficiency Syndromes 2005;39(5):557-561.	E	TA												X
145	Amra B, Bahaee FS, Amini M, Golshan M, Fietze I, Penzel T. Sleep apnea symptoms in diabetics and their first degree relatives. International Journal of Preventive Medicine 2012;3(2):95-101.	E	TA												X
146	Andersen AE, Stoner SA, Rolls BJ. Improved eating behavior in eating-disordered inpatients after treatment: documentation in a naturalistic setting. Int J Eat Disord 1996;20(4):397-403.	E	TA												X
147	Andersen JB, Owe JF, Engeland A, Gilhus NE. Total drug treatment and comorbidity in myasthenia gravis: a population-based cohort study. European Journal of Neurology 2014;21(7):948-955.	E	TA												X
148	Andersen LB, Froberg K, Kristensen PL, Moller NC, Resaland GK, Anderssen SA. Secular trends in physical fitness in Danish adolescents. Scandinavian Journal of Medicine & Science in Sports 2010;20(5):757-763.	E	TA												X
149	Andersen LB, Lauersen JB, Brønd JC, Anderssen SA, Sardinha LB, Steene-Johannessen J, et al. A new approach to define and diagnose cardiometabolic disorder in children. Journal of Diabetes Research 2015;2015.	E	TA												X
150	Andersen LB, Wedderkopp N, Kristensen P, Moller NC, Froberg K, Cooper AR. Cycling to school and cardiovascular risk factors: a longitudinal study. J Phys Act Health 2011;8(8):1025-33.	E	TA												X
151	Andersen LF, Jacobs DR, Gross MD, Schreiner PJ, Williams OD, Lee DH. Longitudinal associations between body mass index and serum carotenoids: the CARDIA study. British Journal of Nutrition 2006;95(2):358-365.	E	TA												X
152	Andersen LG, Angquist L, Eriksson JG, Forsen T, Gamborg M, Osmond C, et al. Birth Weight, Childhood Body Mass Index and Risk of Coronary Heart Disease in Adults: Combined Historical Cohort Studies. Plos One 2010;5(11).	E	F												X	outcome CHD
153	Anderson EL, Fraser A, McNally W, Sattar N, Lashen H, Fleming R, et al. Anti-mullerian hormone is not associated with cardiometabolic risk factors in adolescent females. PLoS One 2013;8(5):e64510.	E	TA												X
154	Anderson SG, Heald A, Younger N, Bujawansa S, Narayanan RP, McCulloch A, et al. Screening for hypogonadism in diabetes 2008/9: results from the Cheshire Primary Care cohort. Prim Care Diabetes 2012;6(2):143-8.	E	TA												X
155	Anderson SG, Narayanan RP, Amlesh J, Qureshi MZ, Heald AH. Type 1 diabetes in Cheshire: cardiometabolic risk factor trends (2004-2009). Prim Care Diabetes 2012;6(2):123-6.	E	TA												X
156	Andersson ES, Tynelius P, Nohr EA, Sørensen TIA, Rasmussen F. No association of maternal gestational weight gain with offspring blood pressure and hypertension at age 18 years in male sibling-pairs: A prospective register-based cohort study. PLoS ONE 2015;10(3).	E	TA												X
157	Andrade D, Kim M, Blanco LP, Karumanchi SA, Koo GC, Redecha P, et al. Interferon-alpha and Angiogenic Dysregulation in Pregnant Lupus Patients Who Develop Preeclampsia. Arthritis & Rheumatology 2015;67(4):977-987.	E	TA												X
158	Andreassi MG, Barale R, Iozzo P, Picano E. The association of micronucleus frequency with obesity, diabetes and cardiovascular disease. Mutagenesis 2011;26(1):77-83.	E	TA												X
159	Andres A, Mitchell AD, Badger TM. QMR: validation of an infant and children body composition instrument using piglets against chemical analysis. Int J Obes (Lond) 2010;34(4):775-80.	E	TA												X
160	Andriska J, Gombik M, Breyer H, Tarr A. Hypertension in children and adolescents results of a long-term follow-up study 1975-1985. Clinical and Experimental Hypertension 1986;8(4-5):567-569.	E	TA												X	outcome HT in children and not in adults. No adult data
161	Angeles Zulet M, Puchau B, Hermsdorff HHM, Navarro C, Alfredo Martinez J. Dietary selenium intake is negatively associated with serum sialic acid and metabolic syndrome features in healthy young adults. Nutrition Research 2009;29(1):41-48.	E	TA												X
162	Angell PJ, Chester N, Green DJ, Shah R, Somauroo J, Whyte G, et al. Anabolic Steroid Use and Longitudinal, Radial, and Circumferential Cardiac Motion. Medicine and Science in Sports and Exercise 2012;44(4):583-590.	E	TA												X
163	Angell PJ, Ismail TF, Jabbour A, Smith G, Dahl A, Wage R, et al. Ventricular structure, function, and focal fibrosis in anabolic steroid users: a CMR study. Eur J Appl Physiol 2014;114(5):921-8.	E	TA												X
164	Antel J, Albayrak O, Heusch G, Banaschewski T, Hebebrand J. Assessment of potential cardiovascular risks of methylphenidate in comparison with sibutramine: do we need a SCOUT (trial)? Eur Arch Psychiatry Clin Neurosci 2015;265(3):233-47.	E	TA												X
165	Antolovic D, Reissfelder C, Özkan T, Galindo L, Büchler MW, Koch M, et al. Restoration of intestinal continuity after Hartmann's procedure-not a benign operation. Are there predictors for morbidity? Langenbeck's Archives of Surgery 2011;396(7):989-996.	E	TA												X
166	Antonisamy B, Raghupathy P, Christopher S, Richard J, Rao PSS, Barker DJP, et al. Cohort profile: The 1969-73 vellore birth cohort study in South India. International Journal of Epidemiology 2009;38(3):663-669.	E	TA												X
167	Aoki N, Soma K, Shindo M, Kurosawa T, Ohwada T. Evaluation of potential fat emboli during placement of intramedullary nails after orthopedic fractures. Chest 1998;113(1):178-81.	E	TA												X
168	Appenzeller S, Cendes F, Costallat LTL. Epileptic seizures in systemic lupus erythematosus. Neurology 2004;63(10):1808-1812.	E	TA												X
169	Appleton AA, Loucks EB, Buka SL, Rimm E, Kubzansky LD. Childhood emotional functioning and the developmental origins of cardiovascular disease risk. J Epidemiol Community Health 2013;67(5):405-11.	E	TA												X
170	Apte M, McGwin G, Jr., Vila LM, Kaslow RA, Alarcon GS, Reveille JD. Associated factors and impact of myocarditis in patients with SLE from LUMINA, a multiethnic US cohort. Rheumatology 2008;47(3):362-367.	E	TA												X
171	Archer SL, Hilner JE, Dyer AR, Greenlund KJ, Colangelo LA, Kiefe CI, et al. Association of education with dietary intake among young adults in the bi-ethnic Coronary Artery Risk Development in Young Adults (CARDIA) cohort. Public Health Nutr 2003;6(7):689-95.	E	TA												X
172	Archer SL, Liu K, Dyer AR, Ruth KJ, Jacobs DR, Jr., Van Horn L, et al. Relationship between changes in dietary sucrose and high density lipoprotein cholesterol: the CARDIA study. Coronary Artery Risk Development in Young Adults. Ann Epidemiol 1998;8(7):433-8.	E	TA												X
173	Ardoin SP, Schanberg LE, Sandborg C, Yow E, Barnhart HX, Mieszkalski K, et al. Laboratory markers of cardiovascular risk in pediatric SLE: the APPLE baseline cohort. Lupus 2010;19(11):1315-25.	E	TA												X
174	Ardoin SP, Schanberg LE, Sandborg CI, Barnhart HX, Evans GW, Yow E, et al. Secondary analysis of APPLE study suggests atorvastatin may reduce atherosclerosis progression in pubertal lupus patients with higher C reactive protein. Annals of the Rheumatic Diseases 2014;73(3):557-566.	E	TA												X
175	Arellano R, Nurmohamed A, Rumman A, Day AG, Milne B, Phelan R, et al. The utility of transthoracic echocardiography to confirm central line placement: An observational study. Canadian Journal of Anesthesia-Journal Canadien D Anesthesie 2014;61(4):340-346.	E	TA												X
176	Argo JL, Yellumahanthi DK, Ballem N, Harrigan MR, Fisher Iii WS, Wesley MM, et al. Laparoscopic versus open approach for implantation of the peritoneal catheter during ventriculoperitoneal shunt placement. Surgical Endoscopy and Other Interventional Techniques 2009;23(7):1449-1455.	E	TA												X
177	Arija V, Salas Salvado J, Fernandez-Ballart J, Cuco G, Marti-Henneberg C. [Food consumption, habits, and nutritional status of the population of Reus (VIII). Evolution of energy and nutrient intake from 1983 to 1993]. Med Clin (Barc) 1996;106(2):45-50.	E	TA												X
178	Arikawa AY, O'Dougherty M, Kaufman BC, Smith AJ, Thomas W, Warren M, et al. Women in Steady Exercise Research (WISER): study design and methods. Contemp Clin Trials 2010;31(5):457-65.	E	TA												X
179	Arlt W, Willis DS, Wild SH, Krone N, Doherty EJ, Hahner S, et al. Health status of adults with congenital adrenal hyperplasia: a cohort study of 203 patients. J Clin Endocrinol Metab 2010;95(11):5110-21.	E	TA												X
180	Armenian SH, Sun CL, Francisco L, Steinberger J, Kurian S, Wong FL, et al. Late congestive heart failure after hematopoietic cell transplantation. Journal of Clinical Oncology 2008;26(34):5537-5543.	E	TA												X
181	Armstrong GT, Joshi VM, Zhu L, Srivastava D, Zhang N, Ness KK, et al. Increased tricuspid regurgitant jet velocity by Doppler echocardiography in adult survivors of childhood cancer: a report from the St Jude Lifetime Cohort Study. J Clin Oncol 2013;31(6):774-81.	E	TA												X
182	Armstrong GT, Oeffinger KC, Chen Y, Kawashima T, Yasui Y, Leisenring W, et al. Modifiable Risk Factors and Major Cardiac Events Among Adult Survivors of Childhood Cancer. Journal of Clinical Oncology 2013;31(29):3673-+.	E	TA												X
183	Armstrong GT, Stovall M, Robison LL. Long-term effects of radiation exposure among adult survivors of childhood cancer: results from the childhood cancer survivor study. Radiat Res 2010;174(6):840-50.	E	TA												X
184	Armstrong MJ, Hazlehurst JM, Hull D, Guo K, Borrows S, Yu J, et al. Abdominal subcutaneous adipose tissue insulin resistance and lipolysis in patients with non-alcoholic steatohepatitis. Diabetes, Obesity and Metabolism 2014;16(7):651-660.	E	TA												X
185	Armstrong N, Davies B. The prevalence of coronary risk factors in children - review. Acta Paediatrica Belgica 1980;33(4):209-217.	E	T	X
186	Arner P, Bernard S, Salehpour M, Possnert G, Liebl J, Steier P, et al. Dynamics of human adipose lipid turnover in health and metabolic disease. Nature 2011;478(7367):110-3.	E	TA												X
187	Arnold C, Wenta D, Mller-Ehmsen J, Sreeram N, Graf C. Progenitor cell number is correlated to physical performance in obese children and young adolescents. Cardiology in the Young 2010;20(4):381-386.	E	TA												X
188	Arnold TJ, Schweitzer A, Hoffman HJ, Onyewu C, Hurtado ME, Hoffman EP, et al. Neck and waist circumference biomarkers of cardiovascular risk in a cohort of predominantly African-American college students: a preliminary study. J Acad Nutr Diet 2014;114(1):107-16.	E	TA												X
189	Aronsson CA, Vehik K, Yang J, Uusitalo U, Hay K, Joslowski G, et al. Use of dietary supplements in pregnant women in relation to sociodemographic factors - a report from The Environmental Determinants of Diabetes in the Young (TEDDY) study. Public Health Nutr 2013;16(8):1390-402.	E	TA												X
190	Arpadi SM, Cuff PA, Horlick M, Wang J, Kotler DP. Lipodystrophy in HIV-infected children is associated with high viral load and low CD4+ -lymphocyte count and CD4+ -lymphocyte percentage at baseline and use of protease inhibitors and stavudine. J Acquir Immune Defic Syndr 2001;27(1):30-4.	E	TA												X
191	Arrebola JP, Mutch E, Cuellar M, Quevedo M, Claure E, Mejia LM, et al. Factors influencing combined exposure to three indicator polychlorinated biphenyls in an adult cohort from Bolivia. Environmental Research 2012;116:17-25.	E	TA												X
192	Artaud F, Dugravot A, Sabia S, Singh-Manoux A, Tzourio C, Elbaz A. Unhealthy behaviours and disability in older adults: Three-City Dijon cohort study. Bmj-British Medical Journal 2013;347.	E	TA												X
193	Artim-Esen B, Cene E, Sahinkaya Y, Ertan S, Pehlivan O, Kamali S, et al. Cluster Analysis of Autoantibodies in 852 Patients with Systemic Lupus Erythematosus from a Single Center. Journal of Rheumatology 2014;41(7):1304-1310.	E	TA												X
194	Arya R, Lehman D, Hunt KJ, Schneider J, Almasy L, Blangero J, et al. Evidence for bivariate linkage of obesity and HDL-C levels in the Framingham Heart Study. BMC Genet 2003;4 Suppl 1:S52.	E	TA												X
195	Asayama K, Staessen JA, Hayashi K, Hosaka M, Tatsuta N, Kurokawa N, et al. Mother-offspring aggregation in home versus conventional blood pressure in the Tohoku Study of Child Development (TSCD). Acta Cardiol 2012;67(4):449-56.	E	TA												X
196	Asche CV, Kim J, Kulkarni AS, Chakravarti P, Andersson K-E. Presence of central nervous system, cardiovascular and overall co-morbidity burden in patients with overactive bladder disorder in a real-world setting. Bju International 2012;109(4):572-580.	E	TA												X
197	Aschengrau A, Winter MR, Vieira VM, Webster TF, Janulewicz PA, Gallagher LG, et al. Long-term health effects of early life exposure to tetrachloroethylene (PCE)-contaminated drinking water: A retrospective cohort study. Environmental Health: A Global Access Science Source 2015;14(1).	E	TA												X
198	Asellus P, Nordstrom P, Jokinen J. Cholesterol and CSF 5-HIAA in attempted suicide. J Affect Disord 2010;125(1-3):388-92.	E	TA												X
199	Asha'ari ZA, Ahmad R, Rahman J, Kamarudin N, Ishlah LW. Contrecoup injury in patients with traumatic temporal bone fracture. Journal of Laryngology and Otology 2011;125(8):781-785.	E	TA												X
200	Assmann G, Schulte H. The importance of triglycerides: results from the Prospective Cardiovascular Munster (PROCAM) Study. Eur J Epidemiol 1992;8 Suppl 1:99-103.	E	TA												X
201	Åstrand PO. Quantification of exercise capability and evaluation of physical capacity in man. Progress in Cardiovascular Diseases 1976;19(1):51-67.	E	TA												X
202	Atabaki SM, Stiell IG, Bazarian JJ, Sadow KE, Vu TT, Camarca MA, et al. A clinical decision rule for cranial computed tomography in minor pediatric head trauma. Archives of Pediatrics & Adolescent Medicine 2008;162(5):439-445.	E	TA												X
203	Atabek ME, Pirgon O, Kurtoglu S. Prevalence of metabolic syndrome in obese Turkish children and adolescents. Diabetes Research and Clinical Practice 2006;72(3):315-321.	E	TA												X
204	Atherton K, Power C. Health inequalities with the National Statistics-Socioeconomic classification: disease risk factors and health in the 1958 British birth cohort. Eur J Public Health 2007;17(5):486-91.	E	TA												X
205	Atlantis E, Baker M. Obesity effects on depression: systematic review of epidemiological studies. Int J Obes (Lond) 2008;32(6):881-91.	E	TA												X
206	Attanasio AF, Bates PC, Ho KK, Webb SM, Ross RJ, Strasburger CJ, et al. Human growth hormone replacement in adult hypopituitary patients: long-term effects on body composition and lipid status--3-year results from the HypoCCS Database. J Clin Endocrinol Metab 2002;87(4):1600-6.	E	TA												X
207	Attard SM, Herring AH, Howard AG, Gordon-Larsen P. Longitudinal trajectories of BMI and cardiovascular disease risk: the national longitudinal study of adolescent health. Obesity (Silver Spring) 2013;21(11):2180-8.	E	Full												X	Outcome: HT
208	Attux C, Martini LC, Araujo CM, Roma AM, Reis AF, Bressan RA. The effectiveness of a non-pharmacological intervention for weight gain management in severe mental disorders: results from a national multicentric study. Rev Bras Psiquiatr 2011;33(2):117-21.	E	TA												X
209	Atzinger CL, Meyer RA, Khoury PR, Gao Z, Tinkle BT. Cross-Sectional and Longitudinal Assessment of Aortic Root Dilation and Valvular Anomalies in Hypermobile and Classic Ehlers-Danlos Syndrome. Journal of Pediatrics 2011;158(5):826-U161.	E	TA												X
210	Aucott L, Rothnie H, McIntyre L, Thapa M, Waweru C, Gray D. Long-term weight loss from lifestyle intervention benefits blood pressure?: a systematic review. Hypertension 2009;54(4):756-62.	E	TA												X
211	Aude-Rueda O, Aguilar-Nungaray G, Villa-Romero A, Cruz-Bautista I, Aguilar-Salinas CA. [The hyperlipidemia diagnosis based on phenotype]. Rev Med Inst Mex Seguro Soc 2009;47(2):121-8.	E	TA												X
212	Augarten A, Tov AB, Madgar I, Barak A, Akons H, Laufer J, et al. The changing face of the exocrine pancreas in cystic fibrosis: The correlation between pancreatic status, pancreatitis and cystic fibrosis genotype. European Journal of Gastroenterology and Hepatology 2008;20(3):164-168.	E	TA												X
213	Aulchenko YS, Ripatti S, Lindqvist I, Boomsma D, Heid IM, Pramstaller PP, et al. Loci influencing lipid levels and coronary heart disease risk in 16 European population cohorts. Nat Genet 2009;41(1):47-55.	E	TA												X
214	Austin DC, Gans I, Park MJ, Carey JL, Kelly JD. The association of metabolic syndrome markers with adhesive capsulitis. Journal of Shoulder and Elbow Surgery 2014;23(7):1043-1051.	E	TA												X
215	Avitabile CM, Leonard MB, Zemel BS, Brodsky JL, Lee D, Dodds K, et al. Lean mass deficits, vitamin D status and exercise capacity in children and young adults after Fontan palliation. Heart 2014;100(21):1702-1707.	E	TA												X
216	Aviv A, Chen W, Gardner JP, Kimura M, Brimacombe M, Cao X, et al. Leukocyte telomere dynamics: longitudinal findings among young adults in the Bogalusa Heart Study. Am J Epidemiol 2009;169(3):323-9.	E	TA												X
217	Ayala R, Grande S, Bustelos R, Ribera C, García-Sesma A, Jimenez C, et al. Obesity is an independent risk factor for pre-transplant portal vein thrombosis in liver recipients. BMC Gastroenterology 2012;12.	E	TA												X
218	Ayonrinde OT, Olynyk JK, Beilin LJ, Mori TA, Pennell CE, de Klerk N, et al. Gender-specific differences in adipose distribution and adipocytokines influence adolescent nonalcoholic fatty liver disease. Hepatology 2011;53(3):800-9.	E	TA												X
219	Ayotte P, Muckle G, Jacobson JL, Jacobson SW, Dewailly E. Assessment of pre- and postnatal exposure to polychlorinated biphenyls: lessons from the Inuit Cohort Study. Environ Health Perspect 2003;111(9):1253-8.	E	TA												X
220	Aytemir K, Oto A, Canpolat U, Sunman H, Yorgun H, Sahiner L, et al. Immediate and medium-term outcomes of cryoballoon-based pulmonary vein isolation in patients with paroxysmal and persistent atrial fibrillation: single-centre experience. J Interv Card Electrophysiol 2013;38(3):187-95.	E	TA												X
221	Azadbakht L, Kelishadi R, Khodarahmi M, Qorbani M, Heshmat R, Motlagh ME, et al. The association of sleep duration and cardiometabolic risk factors in a national sample of children and adolescents: The CASPIAN III Study. Nutrition 2013;29(9):1133-1141.	E	TA												X
222	Azadbakht L, Mirmiran P, Esmaillzadeh A, Azizi F. Dairy consumption is inversely associated with the prevalence of the metabolic syndrome in Tehranian adults. Am J Clin Nutr 2005;82(3):523-30.	E	TA												X
223	Azevedo PM, Bauer R, Caparbo VdF, Almeida Silva CA, Bonfa E, Rodrigues Pereira RM. Interleukin-1 receptor antagonist gene (IL1RN) polymorphism possibly associated to severity of rheumatic carditis in a Brazilian cohort. Cytokine 2010;49(1):109-113.	E	TA												X
224	Azizi F, Rahmani M, Emami H, Madjid M. Tehran lipid and glucose study: Rationale and design. CVD Prevention 2000;3(3):242-247.	E	TA												X
225	Azizi F, Rahmani M, Emami H, Mirmiran P, Hajipour R, Madjid M, et al. Cardiovascular risk factors in an Iranian urban population: Tehran lipid and glucose study (phase 1). Soz Praventivmed 2002;47(6):408-26.	E	TA		X
226	Baba S, Wikström AK, Stephansson O, Cnattingius S. Changes in snuff and smoking habits in Swedish pregnant women and risk for small for gestational age births. BJOG: An International Journal of Obstetrics and Gynaecology 2013;120(4):456-462.	E	TA												X
227	Babizhayev MA, Savel'yeva EL, Moskvina SN, Yegorov YE. Telomere length is a biomarker of cumulative oxidative stress, biologic age, and an independent predictor of survival and therapeutic treatment requirement associated with smoking behavior. American Journal of Therapeutics 2011;18(6):e209-e226.	E	TA												X
228	Babu R, Owens TR, Karikari IO, Moreno J, Cummings TJ, Gottfried ON, et al. Spinal Cavernous and Capillary Hemangiomas in Adults. Spine 2013;38(7):E423-E430.	E	TA												X
229	Bacchetta J, Dubourg L, Harambat J, Ranchin B, Abou-Jaoude P, Arnaud S, et al. The Influence of Glomerular Filtration Rate and Age on Fibroblast Growth Factor 23 Serum Levels in Pediatric Chronic Kidney Disease. Journal of Clinical Endocrinology & Metabolism 2010;95(4):1741-1748.	E	TA												X
230	Back M, Avignon A, Stanke-Labesque F, Boegner C, Attalin V, Leprieur E, et al. Leukotriene Production Is Increased in Abdominal Obesity. Plos One 2014;9(12).	E	TA												X
231	Badagliacca R, Poscia R, Pezzuto B, Papa S, Nona A, Mancone M, et al. Pulmonary Arterial Dilatation in Pulmonary Hypertension: Prevalence and Prognostic Relevance. Cardiology 2012;121(2):76-82.	E	TA												X
232	Baer HJ, Schnitt SJ, Connolly JL, Byrne C, Cho E, Willett WC, et al. Adolescent diet and incidence of proliferative benign breast disease. Cancer Epidemiol Biomarkers Prev 2003;12(11 Pt 1):1159-67.	E	TA												X
233	Baeta IG, Bittencourt FV, Gontijo B, Goulart EM. Comorbidities and cardiovascular risk factors in patients with psoriasis. An Bras Dermatol 2014;89(5):735-44.	E	TA												X
234	Bahrami G, Rahimi Z. Fatty acid composition of human milk in Western Iran. European Journal of Clinical Nutrition 2005;59(4):494-497.	E	TA												X
235	Bakalov D, Boyanov M, Tsakova A. Lack of correlation of the serum 25(OH) vitamin D levels with the glycated hemoglobin A1c and the lipid profile in type 2 diabetes patients on oral antidiabetic drugs - Preliminary data. Acta Medica Bulgarica 2014;41(2):12-19.	E	TA												X
236	Baker AM, Haeri S. Estimating risk factors for development of preeclampsia in teen mothers. Archives of Gynecology and Obstetrics 2012;286(5):1093-1096.	E	TA												X
237	Baker JL, Olsen LW, Sorensen TIA. Childhood body-mass index and the risk of coronary heart disease in adulthood. New England Journal of Medicine 2007;357(23):2329-2337.	E	F												X	outcome CHD
238	Bakkaloglu SA, Borzych D, Ha IS, Serdaroglu E, Buescher R, Salas P, et al. Cardiac Geometry in Children Receiving Chronic Peritoneal Dialysis: Findings from the International Pediatric Peritoneal Dialysis Network (IPPN) Registry. Clinical Journal of the American Society of Nephrology 2011;6(8):1926-1933.	E	TA												X
239	Bakker H, Kooijman MN, van der Heijden AJ, Hofman A, Franco OH, Taal HR, et al. Kidney size and function in a multi-ethnic population-based cohort of school-age children. Pediatr Nephrol 2014;29(9):1589-98.	E	TA												X
240	Bakker R, Rifas-Shiman SL, Kleinman KP, Lipshultz SE, Gillman MW. Maternal calcium intake during pregnancy and blood pressure in the offspring at age 3 years: a follow-up analysis of the Project Viva cohort. Am J Epidemiol 2008;168(12):1374-80.	E	TA												X
241	Bakland G, Gran JT, Nossent JC. Increased mortality in ankylosing spondylitis is related to disease activity. Annals of the Rheumatic Diseases 2011;70(11):1921-1925.	E	TA												X
242	Baldeweg SE, Golay A, Natali A, Balkau B, Del Prato S, Coppack SW. Insulin resistance, lipid and fatty acid concentrations in 867 healthy Europeans. European Group for the Study of Insulin Resistance (EGIR). Eur J Clin Invest 2000;30(1):45-52.	E	TA												X
243	Balletshofer BM, Rittig K, Rett K, Haring HU, Nawroth PP. Flow associated (endothelium dependent) vasodilation and TSH-levels in young normotensive and normoglycemic subjects. Vasa 2001;30(2):97-100.	E	TA												X
244	Bankir L, Perucca J, Weinberger MH. Ethnic differences in urine concentration: possible relationship to blood pressure. Clin J Am Soc Nephrol 2007;2(2):304-12.	E	TA												X
245	Bansal N, Anderson SG, Vyas A, Gemmell I, Charlton-Menys V, Oldroyd J, et al. Adiponectin and lipid profiles compared with insulins in relation to early growth of British South Asian and European children: the Manchester children's growth and vascular health study. J Clin Endocrinol Metab 2011;96(8):2567-74.	E	TA												X
246	Bansal N, Vittinghoff E, Peralta CA, Shlipak MG, Grubbs V, Jacobs DR, et al. Estimated kidney function based on serum cystatin C and risk of subsequent coronary artery calcium in young and middle-aged adults with preserved kidney function: results from the CARDIA study. Am J Epidemiol 2013;178(3):410-7.	E	TA												X
247	Banzato C, Maffeis C, Maines E, Cavarzere P, Gaudino R, Fava C, et al. Hypovitaminosis D and nocturnal hypertension in obese children: an interesting link. J Hum Hypertens 2014;28(6):360-6.	E	TA												X
248	Bao W, Srinivasan SR, Berenson GS. Persistent elevation of plasma insulin levels is associated with increased cardiovascular risk in children and young adults. The Bogalusa Heart Study. Circulation 1996;93(1):54-9.	E	TA												X	exposure: elevated insulin
249	Bao W, Srinivasan SR, Valdez R, Greenlund KJ, Wattigney WA, Berenson GS. Longitudinal changes in cardiovascular risk from childhood to young adulthood in offspring of parents with coronary artery disease: the Bogalusa Heart Study. JAMA 1997;278(21):1749-54.	E	TA												X	exposure: Parental CAD
250	Bao W, Srinivasan SR, Wattigney WA, Bao W, Berenson GS. Usefulness of childhood low-density lipoprotein cholesterol level in predicting adult dyslipidemia and other cardiovascular risks. The Bogalusa Heart Study. Arch Intern Med 1996;156(12):1315-20.	E	Full												X	Including another article by Freedman 2001 from BHS
251	Bao W, Srinivasan SR, Wattigney WA, Berenson GS. Persistence of multiple cardiovascular risk clustering related to syndrome X from childhood to young adulthood. The Bogalusa Heart Study. Arch Intern Med 1994;154(16):1842-7.	E	Full												X	Outcome: Met S
252	Bao W, Threefoot SA, Srinivasan SR, Berenson GS. Essential hypertension predicted by tracking of elevated blood pressure from childhood to adulthood: the Bogalusa Heart Study. Am J Hypertens 1995;8(7):657-65.	E	Full												X	Including another article by Freedman 2001 from BHS
253	Baptiste-Roberts K, Salafia CM, Nicholson WK, Duggan A, Wang NY, Brancati FL. Maternal risk factors for abnormal placental growth: The national collaborative perinatal project. BMC Pregnancy and Childbirth 2008;8.	E	TA												X
254	Barakat A, Williams KM, Prevost AT, Kinmonth AL, Wareham NJ, Griffin SJ, et al. Changes in physical activity and modelled cardiovascular risk following diagnosis of diabetes: 1-year results from the ADDITION-Cambridge trial cohort. Diabetic Medicine 2013;30(2):233-238.	E	TA												X
255	Baranowski T, Cullen KW, Baranowski J. Psychosocial correlates of dietary intake: advancing dietary intervention. Annu Rev Nutr 1999;19:17-40.	E	TA												X
256	Barazzoni R, Cappellari GG, Semolic A, Chendi E, Ius M, Situlin R, et al. The association between hematological parameters and insulin resistance is modified by body mass index - Results from the North-East Italy MoMa population study. PLoS ONE 2014;9(7).	E	TA												X
257	Barbagallo CM, Polizzi F, Severino M, Onorato F, Noto D, Cefalu AB, et al. Distribution of risk factors, plasma lipids, lipoproteins and dyslipidemias in a small Mediterranean island: the Ustica Project. Nutr Metab Cardiovasc Dis 2002;12(5):267-74.	E	TA		X
258	Barbat-Artigas S, Dupontgand S, Fex A, Karelis AD, Aubertin-Leheudre M. Relationship between dynapenia and cardiorespiratory functions in healthy postmenopausal women: novel clinical criteria. Menopause 2011;18(4):400-5.	E	TA												X
259	Barbeau P, Kulharya A, Harshfield G, Snieder H, Davis H, Treiber F. Association between angiotensin II type I receptor polymorphism and resting hemodynamics in black and white youth. Ethn Dis 2002;12(1):S1-68-71.	E	TA												X
260	Barbeau P, Litaker MS, Jackson RW, Treiber FA. A tyrosine hydroxylase microsatellite and hemodynamic response to stress in a multi-ethnic sample of youth. Ethn Dis 2003;13(2):186-92.	E	TA												X
261	Barbieri MA, Portella AK, Silveira PP, Bettiol H, Agranonik M, Silva AA, et al. Severe intrauterine growth restriction is associated with higher spontaneous carbohydrate intake in young women. Pediatr Res 2009;65(2):215-20.	E	TA												X
262	Barbosa EJ, Glad CA, Nilsson AG, Filipsson Nystrom H, Gotherstrom G, Svensson PA, et al. Genotypes associated with lipid metabolism contribute to differences in serum lipid profile of GH-deficient adults before and after GH replacement therapy. Eur J Endocrinol 2012;167(3):353-62.	E	TA												X
263	Barbosa JAA, Mota CCC, Simões E Silva AC, Nunes MDCP, Barbosa MM. Assessing pre-clinical ventricular dysfunction in obese children and adolescents: The value of speckle tracking imaging. European Heart Journal Cardiovascular Imaging 2013;14(9):882-889.	E	TA												X
264	Barbosa L, Butte NF, Villalpando S, Wong WW, Smith EO. Maternal energy balance and lactation performance of Mesoamerindians as a function of body mass index. Am J Clin Nutr 1997;66(3):575-83.	E	TA												X
265	Barbour MM, Hume AL, Lapane KL, Derby CA, Carleton RA. Predictors of future antihypertensive use in patients with mildly elevated blood pressure. Pharmacotherapy 1995;15(3):272-278.	E	TA												X
266	Barker DJ, Eriksson JG, Forsen T, Osmond C. Fetal origins of adult disease: strength of effects and biological basis. Int J Epidemiol 2002;31(6):1235-9.	E	TA												X	Outcome: HT
267	Barker DJ, Forsen T, Eriksson JG, Osmond C. Growth and living conditions in childhood and hypertension in adult life: a longitudinal study. J Hypertens 2002;20(10):1951-6.	E	F													Outcome: HT
268	Barker DJ, Gelow J, Thornburg K, Osmond C, Kajantie E, Eriksson JG. The early origins of chronic heart failure: impaired placental growth and initiation of insulin resistance in childhood. Eur J Heart Fail 2010;12(8):819-25.	E	TA												X
270	Barker FG, 2nd, Amin-Hanjani S. Changing neurosurgical workload in the United States, 1988-2001: craniotomy other than trauma in adults. Neurosurgery 2004;55(3):506-17; discussion 517-8.	E	TA												X
271	Barlow-Mosha L, Eckard AR, McComsey GA, Musoke PM. Metabolic complications and treatment of perinatally HIV-infected children and adolescents. Journal of the International AIDS Society 2013;16.	E	TA												X
272	Barnholtz-Sloan JS, Poisson LM, Coon SW, Chase GA, Rybicki BA. Analysis of gene x environment interactions in sibships using mixed models. BMC Genet 2003;4 Suppl 1:S18.	E	TA												X
273	Barraj LM, Murphy MM, Heshka S, Katz DL. Greater weight loss among men participating in a commercial weight loss program: A pooled analysis of 2 randomized controlled trials. Nutrition Research 2014;34(2):174-177.	E	TA												X
274	Barreiros FA, Falbo Guazzelli CA, Barbosa R, de Assis F, de Araujo FF. Extended regimens of the contraceptive vaginal ring: evaluation of clinical aspects. Contraception 2010;81(3):223-225.	E	TA												X
275	Barrett-Connor E. Gender differences and disparities in all-cause and coronary heart disease mortality: Epidemiological aspects. Best Practice and Research: Clinical Endocrinology and Metabolism 2013;27(4):481-500.	E	TA												X
276	Barry PJ, Waterhouse DF, Reilly CM, McKenna TJ, McKone EF, Gallagher CG. Androgens, Exercise Capacity, and Muscle Function in Cystic Fibrosis. Chest 2008;134(6):1258-1264.	E	TA												X
277	Barry V, Darrow LA, Klein M, Winquist A, Steenland K. Early life perfluorooctanoic acid (PFOA) exposure and overweight and obesity risk in adulthood in a community with elevated exposure. Environ Res 2014;132:62-9.	E	TA												X
278	Barsalou J, Bradley TJ, Silverman ED. Cardiovascular risk in pediatric-onset rheumatological diseases. Arthritis Research and Therapy 2013;15(3).	E	TA												X
279	Barsoum MK, Heit JA, Ashrani AA, Leibson CL, Petterson TM, Bailey KR. Is progestin an independent risk factor for incident venous thromboembolism? A population-based case-control study. Thrombosis Research 2010;126(5):373-378.	E	TA												X
280	Bartels CM, Buhr KA, Goldberg JW, Bell CL, Visekruna M, Nekkanti S, et al. Mortality and Cardiovascular Burden of Systemic Lupus Erythematosus in a US Population-based Cohort. Journal of Rheumatology 2014;41(4):680-687.	E	TA												X
281	Bartels CM, Johnson H, Voelker K, Thorpe C, McBride P, Jacobs EA, et al. Impact of Rheumatoid Arthritis on Receiving a Diagnosis of Hypertension Among Patients With Regular Primary Care. Arthritis Care & Research 2014;66(9):1281-1288.	E	TA												X
282	Barteselli G, Dell'Arti L, Finger RP, Issa PC, Marcon A, Vezzola D, et al. The Spectrum of Ocular Alterations in Patients with beta-Thalassemia Syndromes Suggests a Pathology Similar to Pseudoxanthoma Elasticum. Ophthalmology 2014;121(3):709-718.	E	TA												X
283	Barton BA, Eldridge AL, Thompson D, Affenito SG, Striegel-Moore RH, Franko DL, et al. The relationship of breakfast and cereal consumption to nutrient intake and body mass index: the National Heart, Lung, and Blood Institute Growth and Health Study. J Am Diet Assoc 2005;105(9):1383-9.	E	TA												X
284	Bartosh SM, Leverson G, Robillard D, Sollinger HW. Long-term outcomes in pediatric renal transplant recipients who survive into adulthood. Transplantation 2003;76(8):1195-200.	E	TA												X
285	Bartz S, Freemark M. Pathogenesis and prevention of type 2 diabetes: Parental determinants, breastfeeding, and early childhood nutrition. Current Diabetes Reports 2012;12(1):82-87.	E	TA												X
286	Barzin M, Hosseinpanah F, Saber H, Sarbakhsh P, Nakhoda K, Azizi F. Gender differences time trends for metabolic syndrome and its components among Tehranian children and adolescents. Cholesterol 2012;2012.	E	TA												X
287	Basel-Vanagaite L, Zevit N, Zahav AH, Guo L, Parathath S, Pasmanik-Chor M, et al. Transient Infantile Hypertriglyceridemia, Fatty Liver, and Hepatic Fibrosis Caused by Mutated GPD1, Encoding Glycerol-3-Phosphate Dehydrogenase 1. American Journal of Human Genetics 2012;90(1):49-60.	E	TA												X
288	Basso N, Casella G, Rizzello M, Abbatini F, Soricelli E, Alessandri G, et al. Laparoscopic sleeve gastrectomy as first stage or definitive intent in 300 consecutive cases. Surg Endosc 2011;25(2):444-9.	E	TA												X
289	Basso O, Wilcox AJ, Weinberg CR, Baird DD, Olsen J. Height and risk of severe pre-eclampsia. A study within the Danish National Birth Cohort. International Journal of Epidemiology 2004;33(4):858-863.	E	TA												X
290	Bastarrachea RA, Kent J, Jr., Comuzzie AG. [Study of the genetic component of cardiovascular risk phenotypes in a Mexican population]. Med Clin (Barc) 2007;129(1):11-3.	E	TA												X
291	Basterrechea M, Lertxundi A, Iniguez C, Mendez M, Murcia M, Mozo I, et al. Prenatal exposure to hexachlorobenzene (HCB) and reproductive effects in a multicentre birth cohort in Spain. Sci Total Environ 2014;466-467:770-6.	E	TA												X
292	Bastian LA, Pathiraja VC, Krause K, Namenek Brouwer RJ, Swamy GK, Lovelady CA, et al. Multiparity is associated with high motivation to change diet among overweight and obese postpartum women. Womens Health Issues 2010;20(2):133-8.	E	TA												X
293	Batashki I, Topalovska D, Milchev N, Uchikova E, Terzhumanov R. [Obesity and pregnancy]. Akush Ginekol (Sofiia) 2006;45(1):14-8.	E	TA												X
294	Bateman BT, Huybrechts KF, Hernandez-Diaz S, Liu J, Ecker JL, Avorn J. Methylergonovine maleate and the risk of myocardial ischemia and infarction. American Journal of Obstetrics and Gynecology 2013;209(5):459.e1-459.e13.	E	TA												X
295	Batson B, Belletti D, Wogen J. Effect of African American race on hypertension management: a real-world observational study among 28 US physician practices. Ethn Dis 2010;20(4):409-15.	E	TA												X
296	Batty GD, Deary IJ, Schoon I, Gale CR. Mental ability across childhood in relation to risk factors for premature mortality in adult life: the 1970 British Cohort Study. J Epidemiol Community Health 2007;61(11):997-1003.	E	TA												X
297	Batty GD, Gale CR, Mortensen LH, Langenberg C, Shipley MJ, Deary IJ. Pre-morbid intelligence, the metabolic syndrome and mortality: the Vietnam Experience Study. Diabetologia 2008;51(3):436-43.	E	TA												X
298	Batty GD, Shipley MJ, Mortensen LH, Boyle SH, Barefoot J, Gronbaek M, et al. IQ in late adolescence/early adulthood, risk factors in middle age and later all-cause mortality in men: the Vietnam Experience Study. J Epidemiol Community Health 2008;62(6):522-31.	E	TA												X
299	Batty GD, Whitley E, Kivimäki M, Tynelius P, Rasmussen F. Body mass index and attempted suicide: Cohort study of 1,133,019 Swedish men. American Journal of Epidemiology 2010;172(8):890-899.	E	TA												X
300	Baudrand R, Campino C, Carvajal CA, Olivieri O, Guidi G, Faccini G, et al. High sodium intake is associated with increased glucocorticoid production, insulin resistance and metabolic syndrome. Clinical Endocrinology 2014;80(5):677-684.	E	TA												X
301	Baumeister S, Werdin F, Peek A. The sGAP flap: rare exception or second choice in autologous breast reconstruction? J Reconstr Microsurg 2010;26(4):251-8.	E	TA												X
302	Baumgartner RN, Roche AF, Chumlea WC, Siervogel RM, Glueck CJ. Fatness and fat patterns: associations with plasma lipids and blood pressures in adults, 18 to 57 years of age. Am J Epidemiol 1987;126(4):614-28.	E	TA		X
303	Bautista-Castaño I, Henriquez-Sanchez P, Alemán-Perez N, Garcia-Salvador JJ, Gonzalez-Quesada A, García-Hernández JA, et al. Maternal obesity in early pregnancy and risk of adverse outcomes. PLoS ONE 2013;8(11).	E	TA												X
304	Baye TM, Zhang Y, Smith E, Hillard CJ, Gunnell J, Myklebust J, et al. Genetic variation in cannabinoid receptor 1 (CNR1) is associated with derangements in lipid homeostasis, independent of body mass index. Pharmacogenomics 2008;9(11):1647-56.	E	TA												X
305	Bazzaz JT, Nazari M, Nazem H, Amiri P, Fakhrzadeh H, Heshmat R, et al. Apolipoprotein E gene polymorphism and total serum cholesterol level in Iranian population. J Postgrad Med 2010;56(3):173-5.	E	TA												X
306	Beck SR, Brown WM, Williams AH, Pierce J, Rich SS, Langefeld CD. Age-stratified QTL genome scan analyses for anthropometric measures. BMC Genet 2003;4 Suppl 1:S31.	E	TA												X
307	Becton LJ, Egan BM, Hailpern SM, Shatat IF. Blood pressure reclassification in adolescents based on repeat clinic blood pressure measurements. Journal of Clinical Hypertension 2013;15(10):717-722.	E	TA												X
308	Beekman R, Kuks JBM, Oosterhuis HJGH. Myasthenia gravis: Diagnosis and follow-up of 100 consecutive patients. Journal of Neurology 1997;244(2):112-118.	E	TA												X
309	Beilin L, Huang R-C. Perinatal and childhood precursors of adult cardiovascular disease. Clinical and Experimental Pharmacology and Physiology 2007;34:S2-S4.	E	F	X				X
310	Beilin L, Huang R-C. Childhood obesity, hypertension, the metabolic syndrome and adult cardiovascular disease. Clinical and Experimental Pharmacology and Physiology 2008;35(4):409-411.	E	F	X				X
311	Bekkers MB, Brunekreef B, Smit HA, Kerkhof M, Koppelman GH, Oldenwening M, et al. Early-life determinants of total and HDL cholesterol concentrations in 8-year-old children; the PIAMA birth cohort study. PLoS One 2011;6(9):e25533.	E	F												X	outcomes of interest measured at 8 yearsof age
312	Belibou C, Ancuţa C, Ancuţa E, Filoş C, Chirieac R. Carotid intima-media thickness and plaque as surrogate biomarkers of atherosclerosis among consecutive women with systemic lupus erythematosus. Romanian Journal of Morphology and Embryology 2012;53(1):29-34.	E	TA												X
313	Bell KE, Di Sebastiano KM, Vance V, Hanning R, Mitchell A, Quadrilatero J, et al. A comprehensive metabolic evaluation reveals impaired glucose metabolism and dyslipidemia in breast cancer patients early in the disease trajectory. Clin Nutr 2014;33(3):550-7.	E	TA												X
314	Bell LN, Molleston JP, Morton MJ, Klipsch A, Saxena R, Vuppalanchi R, et al. Hepatic lipid peroxidation and cytochrome P-450 2E1 in pediatric nonalcoholic fatty liver disease and its subtypes. Journal of Clinical Gastroenterology 2011;45(9):800-807.	E	TA												X
315	Bell RA, Mayer-Davis EJ, Beyer JW, D'Agostino RB, Lawrence JM, Linder B, et al. Diabetes in non-hispanic white youth. Diabetes Care 2009;32(SUPPL. 2):S102-S111.	E	TA												X
316	Bell TM, Zarzaur BL. The impact of preexisting comorbidities on failure to rescue outcomes in nonelderly trauma patients. J Trauma Acute Care Surg 2015;78(2):312-7.	E	TA												X
317	Bellentani S, Saccoccio G, Masutti F, Croce LS, Brandi G, Sasso F, et al. Prevalence of and risk factors for hepatic steatosis in Northern Italy. Ann Intern Med 2000;132(2):112-7.	E	TA												X
318	Belmont PJ, Jr., Thomas D, Goodman GP, Schoenfeld AJ, Zacchilli M, Burks R, et al. Combat Musculoskeletal Wounds in a US Army Brigade Combat Team During Operation Iraqi Freedom. Journal of Trauma-Injury Infection and Critical Care 2011;71(1):E1-E7.	E	TA												X
319	Beltran-Sanchez H, Crimmins EM, Teruel GM, Thomas D. Links between childhood and adult social circumstances and obesity and hypertension in the Mexican population. J Aging Health 2011;23(7):1141-65.	E	F		X
320	Bender R, Jockel KH, Richter B, Spraul M, Berger M. Body weight, blood pressure, and mortality in a cohort of obese patients. Am J Epidemiol 2002;156(3):239-45.	E	F												X	Inclusion criteria were age at entry 18–75 years and BMI ≥ 25 kg /m2.
321	Bender R, Zeeb H, Schwarz M, Jockel KH, Berger M. Causes of death in obesity: relevant increase in cardiovascular but not in all-cancer mortality. J Clin Epidemiol 2006;59(10):1064-71.	E	TA												X	Inclusion criteria were age at entry 18–75 years and BMI ≥ 25 kg /m2.
322	Bengtsson BÅ, Abs R, Bennmarker H, Monson JP, Feldt-Rasmussen U, Hernberg-Ståhl E, et al. The effects of treatment and the individual responsiveness to Growth Hormone (GH) replacement therapy in 665 GH-deficient adults. Journal of Clinical Endocrinology and Metabolism 1999;84(11):3929-3935.	E	TA												X
323	Benitez-Aguirre P, Craig ME, Sasongko MB, Jenkins AJ, Wong TY, Wang JJ, et al. Retinal vascular geometry predicts incident retinopathy in young people with type 1 diabetes: a prospective cohort study from adolescence. Diabetes Care 2011;34(7):1622-7.	E	TA												X
324	Benitez-Aguirre PZ, Craig ME, Jenkins AJ, Gallego PH, Cusumano J, Duffin AC, et al. Plantar fascia thickness is longitudinally associated with retinopathy and renal dysfunction: a prospective study from adolescence to adulthood. J Diabetes Sci Technol 2012;6(2):348-55.	E	TA												X
325	Benitez-Aguirre PZ, Sasongko MB, Craig ME, Jenkins AJ, Cusumano J, Cheung N, et al. Retinal vascular geometry predicts incident renal dysfunction in young people with type 1 diabetes. Diabetes Care 2012;35(3):599-604.	E	TA												X
326	Benjamin EJ, Jessup M, Flack JM, Krumholz HM, Liu K, Nadkarni VM, et al. Discovering the full spectrum of cardiovascular disease: Minority Health Summit 2003: report of the Outcomes Writing Group. Circulation 2005;111(10):e124-33.	E	F					X (Report)
327	Benjamin Jr DK, Smith PB, Sun MJM, Murphy MD, Avant D, Mathis L, et al. Safety and transparency of pediatric drug trials. Archives of Pediatrics and Adolescent Medicine 2009;163(12):1080-1086.	E	TA												X
328	Bennett B, Larson-Meyer DE, Ravussin E, Volaufova J, Soros A, Cefalu WT, et al. Impaired insulin sensitivity and elevated ectopic fat in healthy obese vs. nonobese prepubertal children. Obesity (Silver Spring) 2012;20(2):371-5.	E	TA												X
329	Benoit SR, Fleming R, Philis-Tsimikas A, Ji M. Predictors of glycemic control among patients with Type 2 diabetes: A longitudinal study. BMC Public Health 2005;5.	E	TA												X
330	Benson AC, Torode ME, Fiatarone Singh MA. A rationale and method for high-intensity progressive resistance training with children and adolescents. Contemporary Clinical Trials 2007;28(4):442-450.	E	TA												X
331	Benson LJ, Baer HJ, Kaelber DC. Screening for obesity-related complications among obese children and adolescents: 1999-2008. Obesity 2011;19(5):1077-1082.	E	TA												X
332	Benyamin B, Middelberg RP, Lind PA, Valle AM, Gordon S, Nyholt DR, et al. GWAS of butyrylcholinesterase activity identifies four novel loci, independent effects within BCHE and secondary associations with metabolic risk factors. Human Molecular Genetics 2011;20(22):4504-4514.	E	TA												X
333	Benza RL, Gomberg-Maitland M, Naeije R, Arneson CP, Lang IM. Prognostic factors associated with increased survival in patients with pulmonary arterial hypertension treated with subcutaneous treprostinil in randomized, placebo-controlled trials. Journal of Heart and Lung Transplantation 2011;30(9):982-989.	E	TA												X
334	Berendschot TT, Plat J, de Jong A, Mensink RP. Long-term plant stanol and sterol ester-enriched functional food consumption, serum lutein/zeaxanthin concentration and macular pigment optical density. Br J Nutr 2009;101(11):1607-10.	E	TA												X
335	Berenson G, Srinivasan S, Chen W, Li S, Patel D. Racial (black-white) contrasts of risk for hypertensive disease in youth have implications for preventive care: the Bogalusa Heart Study. Ethn Dis 2006;16(3 Suppl 4):S4-2-9.	E	TA												X	HT measured in youth
336	Berenson GS. Obesity--a critical issue in preventive cardiology: the Bogalusa Heart Study. Prev Cardiol 2005;8(4):234-41; quiz 242-3.	E	F	X				X
337	Berenson GS, Chen W, Dasmahapatra P, Fernandez C, Giles T, Xu J, et al. Stimulus response of blood pressure in black and white young individuals helps explain racial divergence in adult cardiovascular disease: The Bogalusa Heart Study. Journal of the American Society of Hypertension 2011;5(4):230-238.	E	F	X
338	Berenson GS, Wattigney WA, Bao W, Srinivasan SR, Radhakrishnamurthy B. Rationale to study the early natural history of heart disease: the Bogalusa Heart Study. Am J Med Sci 1995;310 Suppl 1:S22-8.	E	F	X
339	Berenson GS, Wattigney WA, Webber LS. Epidemiology of hypertension from childhood to young adulthood in black, white, and Hispanic population samples. Public Health Rep 1996;111 Suppl 2:3-6.	E	F												X	Data upto 17 years of age. No analayiss on BMI and HT
340	Beresford MW, Cleary AG, Sills JA, Couriel J, Davidson JE. Cardio-pulmonary involvement in juvenile systemic lupus erythematosus. Lupus 2005;14(2):152-158.	E	TA												X
341	Berg KS, Stenseth R, Wahba A, Pleym H, Videm V. How can we best predict acute kidney injury following cardiac surgery?: a prospective observational study. Eur J Anaesthesiol 2013;30(11):704-12.	E	TA												X
342	Bergh C, Udumyan R, Fall K, Nilsagard Y, Appelros P, Montgomery S. Stress resilience in male adolescents and subsequent stroke risk: cohort study. J Neurol Neurosurg Psychiatry 2014;85(12):1331-6.	E	TA												X
344	Berkey CS, Gardner JD, Frazier AL, Colditz GA. Relation of childhood diet and body size to menarche and adolescent growth in girls. Am J Epidemiol 2000;152(5):446-52.	E	TA												X
345	Berkey CS, Laird NM, Gardner J, Valadian I. Longitudinal analysis of incomplete adolescent data. Ann Hum Biol 1991;18(4):311-26.	E	TA												X
346	Berkey CS, Willett WC, Tamimi RM, Rosner B, Frazier AL, Colditz GA. Vegetable protein and vegetable fat intakes in pre-adolescent and adolescent girls, and risk for benign breast disease in young women. Breast Cancer Res Treat 2013;141(2):299-306.	E	TA												X
347	Berlac JF, Skovlund CW, Lidegaard O. Obstetrical and neonatal outcomes in women following gastric bypass: a Danish national cohort study. Acta Obstet Gynecol Scand 2014;93(5):447-53.	E	TA												X
348	Berman LJ, Weigensberg MJ, Spruijt-Metz D. Physical activity is related to insulin sensitivity in children and adolescents, independent of adiposity: a review of the literature. Diabetes-Metabolism Research and Reviews 2012;28(5):395-408.	E	TA												X
349	Bermudes RA, Keck Jr PE, Welge JA. The prevalence of the metabolic syndrome in psychiatric inpatients with primary psychotic and mood disorders. Psychosomatics 2006;47(6):491-497.	E	TA												X
350	Bernard JY, De Agostini M, Forhan A, de Lauzon-Guillain B, Charles MA, Heude B. The dietary n6:n3 fatty acid ratio during pregnancy is inversely associated with child neurodevelopment in the EDEN mother-child cohort. J Nutr 2013;143(9):1481-8.	E	TA												X
351	Bernardinelli L, Taglietti M, Tinelli C, Romagnoli G. Blood Pressure Blood Lipids and Obesity Index Tracking in 6 to 9-Year-Old Children. Acta Medica Auxologica (Milan) 1984;16(2):113-120.	E	TA												X	Outcome measured in children only
352	Bernatsky S, Boivin JF, Joseph L, Manzi S, Ginzler E, Gladman DD, et al. Mortality in systemic lupus erythematosus. Arthritis and Rheumatism 2006;54(8):2550-2557.	E	TA												X
353	Bernier AV, Correia CE, Haller MJ, Theriaque DW, Shuster JJ, Weinstein DA. Vascular dysfunction in glycogen storage disease type I. J Pediatr 2009;154(4):588-91.	E	TA												X
354	Berry C, Montgomery C, Sattar N, Norrie J, Weaver LT. Fatty acid status of women of reproductive age. European Journal of Clinical Nutrition 2001;55(7):518-524.	E	TA												X
355	Bertheke Post G, de Vente W, Kemper HC, Twisk JW. Longitudinal trends in and tracking of energy and nutrient intake over 20 years in a Dutch cohort of men and women between 13 and 33 years of age: The Amsterdam growth and health longitudinal study. Br J Nutr 2001;85(3):375-85.	E	TA												X
356	Berzin TM, Sanaka S, Barnett SR, Sundar E, Sepe PS, Jakubowski M, et al. A prospective assessment of sedation-related adverse events and patient and endoscopist satisfaction in ERCP with anesthesiologist-administered sedation. Gastrointest Endosc 2011;73(4):710-7.	E	TA												X
357	Besada E, Koldingsnes W, Nossent JC. Serum immunoglobulin levels and risk factors for hypogammaglobulinaemia during long-term maintenance therapy with rituximab in patients with granulomatosis with polyangiitis. Rheumatology 2014;53(10):1818-1824.	E	TA												X
358	Besir FH, Yazgan S, Celbek G, Aydin M, Yazgan O, Erkan ME, et al. [Normal value correlates of carotid intima- media thickness and affecting parameters in healthy adults]. Anadolu Kardiyol Derg 2012;12(5):427-33.	E	TA												X
359	Bessembinders K, Wielders J, van de Wiel A. Severe Hypertriglyceridemia Influenced by Alcohol (SHIBA). Alcohol and Alcoholism 2011;46(2):113-116.	E	TA												X
360	Beukers F, Cranendonk A, De Vries JIP, Wolf H, Lafeber HN, Vriesendorp HC, et al. Catch-up growth in children born growth restricted to mothers with hypertensive disorders of pregnancy. Archives of Disease in Childhood 2013;98(1):30-35.	E	TA												X
361	Beunen G, Malina RM, Lefevre J, Claessens AL, Renson R, Simons J, et al. Size, Fatness and Relative Fat Distribution of Males of Contrasting Maturity Status during Adolescence and as Adults. International Journal of Obesity 1994;18(10):670-678.	E	TA												X
362	Beurrier D, Andre JL, Gueguen R, Spyckerelle Y, Galteau MM, Siest G. [Changes in blood cholesterol levels over a 10-year period; value of a single sample for predicting future blood cholesterol levels]. Arch Mal Coeur Vaiss 1995;88(7):955-60.	E	TA												X
363	Beuther DA, Weiss ST, Sutherland ER. Pulmonary perspective - Obesity and asthma. American Journal of Respiratory and Critical Care Medicine 2006;174(2):112-119.	E	TA												X
364	Beydoun MA, Nalls MA, Canas JA, Evans MK, Zonderman AB. Gene polymorphisms and gene scores linked to low serum carotenoid status and their associations with metabolic disturbance and depressive symptoms in African-American adults. Br J Nutr 2014;112(6):992-1003.	E	TA												X
365	Bhaskaran K, Douglas I, Evans S, van Staa T, Smeeth L. Angiotensin receptor blockers and risk of cancer: cohort study among people receiving antihypertensive drugs in UK General Practice Research Database. BMJ 2012;344:e2697.	E	TA												X
366	Bhat SK, Beilin LJ, Robinson M, Burrows S, Mori TA. Contrasting effects of prenatal life stress on blood pressure and body mass index in young adults. Journal of Hypertension 2015;33(4):711-719.	E	TA												X
367	Bhayani NH, Hyder O, Frederick W, Schulick RD, Wolgang CL, Hirose K, et al. Effect of metabolic syndrome on perioperative outcomes after liver surgery: A National Surgical Quality Improvement Program (NSQIP) analysis. Surgery 2012;152(2):218-26.	E	TA												X
368	Bhuiyan AR, Li S, Li H, Chen W, Srinivasan SR, Berenson GS. Distribution and correlates of arterial compliance measures in asymptomatic young adults: the Bogalusa Heart Study. Am J Hypertens 2005;18(5 Pt 1):684-91.	E	TA												X
369	Bian L, Traurig M, Hanson RL, Marinelarena A, Kobes S, Muller YL, et al. MAP2K3 is associated with body mass index in American Indians and Caucasians and may mediate hypothalamic inflammation. Human Molecular Genetics 2013;22(21):4438-4449.	E	TA												X
370	Bianchi ML, Romano G, Saraifoger S, Costantini D, Limonta C, Colombo C. BMD and body composition in children and young patients affected by cystic fibrosis. J Bone Miner Res 2006;21(3):388-96.	E	TA												X
371	Bidlingmaier M, Strasburger CJ. Growth hormone. Handb Exp Pharmacol 2010(195):187-200.	E	TA												X
372	Bielemann RM, Ramires VV, Gigante DP, Hallal PC, Horta BL. Longitudinal and cross-sectional associations of physical activity with triglyceride and HDLc levels in young male adults. J Phys Act Health 2014;11(4):784-9.	E	TA												X
373	Bigal ME, Gironda M, Tepper SJ, Feleppa M, Rapoport AM, Sheftell FD, et al. Headache prevention outcome and body mass index. Cephalalgia 2006;26(4):445-450.	E	TA												X
374	Bigazzi F, Dal Pino B, Forastiere F, Pistelli R, Rossi G, Simoni M, et al. HDL and clinical and biochemical correlates in Italian non-smoker women. Clinical Chemistry and Laboratory Medicine 2004;42(12):1408-1416.	E	F		X
375	Bingham CML, Lahti-Koski M, Absetz P, Puukka P, Kinnunen M, Pihlajamäki H, et al. Food choices and health during military service: Increases in sugar- and fibre-containing foods and changes in anthropometric and clinical risk factors. Public Health Nutrition 2012;15(7):1248-1255.	E	TA												X
376	Birkenaes AB, Sogaard AJ, Engh JA, Jonsdottir H, Ringen PA, Vaskinn A, et al. Sociodemographic characteristics and cardiovascular risk factors in patients with severe mental disorders compared with the general population. J Clin Psychiatry 2006;67(3):425-33.	E	TA												X
377	Birnbaum AD, Jiang Y, Vasaiwala R, Tessler HH, Goldstein DA. Bilateral Simultaneous-Onset Nongranulomatous Acute Anterior Uveitis Clinical Presentation and Etiology. Archives of Ophthalmology 2012;130(11):1389-1394.	E	TA												X
378	Bischoff SC, Damms-Machado A, Betz C, Herpertz S, Legenbauer T, Loew T, et al. Multicenter evaluation of an interdisciplinary 52-week weight loss program for obesity with regard to body weight, comorbidities and quality of life-a prospective study. International Journal of Obesity 2012;36(4):614-624.	E	F												X	The inclusion criteria comprised an age 18–70 years, body mass index (BMI) >30 kg m􏰁2
379	Bitnun A, Sochett E, Babyn P, Holowka S, Stephens D, Read S, et al. Serum lipids, glucose homeostasis and abdominal adipose tissue distribution in protease inhibitor-treated and naive HIV-infected children. AIDS 2003;17(9):1319-27.	E	TA												X
380	Bittner V. Non-high-density lipoprotein cholesterol and cardiovascular disease. Current Opinion in Lipidology 2003;14(4):367-371.	E	F	X
381	Bitton A, Zaslavsky AM, Ayanian JZ. Health risks, chronic diseases, and access to care among US Pacific Islanders. J Gen Intern Med 2010;25(5):435-40.	E	TA												X
382	Bixler EO, Papaliaga MN, Vgontzas AN, Lin H-M, Pejovic S, Karataraki M, et al. Women sleep objectively better than men and the sleep of young women is more resilient to external stressors: effects of age and menopause. Journal of Sleep Research 2009;18(2):221-228.	E	TA												X
383	Bixler EO, Vgontzas AN, Calhoun S. The Penn State Child Cohort: Diagnostic Criteria and Possible Etiologic Factors of Sleep Apnea Based on Objective Clinical Outcomes. Sleep Medicine Clinics 2009;4(1):1-8.	E	TA												X
384	Bizbiz L, Bonithon-Kopp C, Ducimetierè P, Berr C, Alperovitch A, Robert L. Relation of serum elastase activity to ultrasonographically assessed carotid artery wall lesions and cardiovascular risk factors. The EVA study. Atherosclerosis 1996;120(1-2):47-55.	E	TA												X
385	Bjerregaard P. Childhood conditions and education as determinants of adult height and obesity among Greenland Inuit. Am J Hum Biol 2010;22(3):360-6.	E	TA												X
386	Bjørge T, Engeland A, Tverdal A, Smith GD. Body mass index in adolescence in relation to cause-specific mortality: A follow-up of 230,000 Norwegian adolescents. American Journal of Epidemiology 2008;168(1):30-37.	E	F												X	outcome mortality
387	Bjorge T, Stocks T, Lukanova A, Tretli S, Selmer R, Manjer J, et al. Metabolic Syndrome and Endometrial Carcinoma. American Journal of Epidemiology 2010;171(8):892-902.	E	TA												X
388	Bjork Petersen C, Bauman A, Gronbaek M, Wulff Helge J, Thygesen LC, Tolstrup JS. Total sitting time and risk of myocardial infarction, coronary heart disease and all-cause mortality in a prospective cohort of Danish adults. Int J Behav Nutr Phys Act 2014;11:13.	E	TA												X
389	Bjornadal L, Brandt L, Klareskog L, Askling J. Impact of parental history on patients' cardiovascular mortality in rheumatoid arthritis. Annals of the Rheumatic Diseases 2006;65(6):741-745.	E	TA												X
390	Black A, Murray L, Cardwell C, Davey Smith G, McCarron P. Secular trends in heart rate in young adults, 1949 to 2004: Analyses of cross sectional studies. Heart 2006;92(4):468-473.	E	TA												X
391	Blake KV, Gurrin LC, Beilin LJ, Stanley FJ, Kendall GE, Landau LI, et al. Prenatal ultrasound biometry related to subsequent blood pressure in childhood. Journal of Epidemiology and Community Health 2002;56(9):713-718.	E	TA												X
392	Blanco-Munoz J, Lacasana M, Aguilar-Garduno C, Rodriguez-Barranco M, Bassol S, Cebrian ME, et al. Effect of exposure to p,p '-DDE on male hormone profile in Mexican flower growers. Occupational and Environmental Medicine 2012;69(1):5-11.	E	TA												X
393	Blane D, Hart CL, Davey Smith G, Gillis CR, Hole DJ, Hawthorne VM. Association of cardiovascular disease risk factors with socioeconomic position during childhood and during adulthood. British Medical Journal 1996;313(7070):1434-1438.	E	TA												X
394	Blaser AR, Sarapuu S, Tamme K, Starkopf J. Expanded measurements of intra-abdominal pressure do not increase the detection rate of intra-abdominal hypertension: a single-center observational study. Crit Care Med 2014;42(2):378-86.	E	TA												X
395	Blauwet LA, Libhaber E, Forster O, Tibazarwa K, Mebazaa A, Hilfiker-Kleiner D, et al. Predictors of outcome in 176 South African patients with peripartum cardiomyopathy. Heart 2012;99(5):308-313.	E	TA												X
396	Blijdorp K, van den Heuvel-Eibrink MM, Pieters R, Boot AM, Delhanty PJ, van der Lely AJ, et al. Obesity is underestimated using body mass index and waist-hip ratio in long-term adult survivors of childhood cancer. PLoS One 2012;7(8):e43269.	E	TA												X
397	Block G, Jensen CD, Norkus EP, Hudes M, Crawford PB. Vitamin C in plasma is inversely related to blood pressure and change in blood pressure during the previous year in young Black and White women. Nutr J 2008;7:35.	E	TA												X
398	Block JP, Christakis NA, O'Malley AJ, Subramanian SV. Proximity to food establishments and body mass index in the framingham heart study offspring cohort over 30 years. American Journal of Epidemiology 2011;174(10):1108-1114.	E	TA												X
399	Block-Abraham DM, Turan OM, Doyle LE, Kopelman JN, Atlas RO, Jenkins CB, et al. First-trimester risk factors for preeclampsia development in women initiating aspirin by 16 weeks of gestation. Obstet Gynecol 2014;123(3):611-7.	E	TA												X
400	Bloem LJ, Manatunga AK, Tewksbury DA, Pratt JH. The serum angiotensinogen concentration and variants of the angiotensinogen gene in white and black children. J Clin Invest 1995;95(3):948-53.	E	TA												X
401	Blomberg M. Maternal Obesity and Risk of Postpartum Hemorrhage. Obstetrics and Gynecology 2011;118(3):561-568.	E	TA												X
402	Blomberg M. Maternal and Neonatal Outcomes Among Obese Women With Weight Gain Below the New Institute of Medicine Recommendations. Obstetrics and Gynecology 2011;117(5):1065-1070.	E	TA												X
403	Blonde CV, Webber LS, Foster TA, Berenson GS. Parental history and cardiovascular disease risk factor variables in children. Preventive Medicine 1981;10(1):25-37.	E	TA												X
404	Blonde L, Klein EJ, Han J, Zhang B, Mac SM, Poon TH, et al. Interim analysis of the effects of exenatide treatment on A1C, weight and cardiovascular risk factors over 82 weeks in 314 overweight patients with type 2 diabetes. Diabetes Obes Metab 2006;8(4):436-47.	E	TA												X
405	Bloomer LDS, Nelson CP, Eales J, Denniff M, Christofidou P, Debiec R, et al. Male-specific region of the y chromosome and cardiovascular risk phylogenetic analysis and gene expression studies. Arteriosclerosis, Thrombosis, and Vascular Biology 2013;33(7):1722-1727.	E	TA												X
406	Blumberg SM, Kunkov S, Crain EF, Goldman HS. The predictive value of a normal radiographic anterior fat pad sign following elbow trauma in children. Pediatric Emergency Care 2011;27(7):596-600.	E	TA												X
407	Blumenfeld YJ, Baer RJ, Druzin ML, El-Sayed YY, Lyell DJ, Faucett AM, et al. Association between maternal characteristics, abnormal serum aneuploidy analytes, and placental abruption. Am J Obstet Gynecol 2014;211(2):144 e1-9.	E	TA												X
408	Blumentals WA, Hwu P, Kobayashi N, Ogura E. Obesity in hospitalized type 2 diabetes patients: a descriptive study. Med Sci Monit 2013;19:359-65.	E	TA												X
409	Blumfield M, Hure A, MacDonald-Wicks L, Smith R, Simpson S, Raubenheimer D, et al. The association between the macronutrient content of maternal diet and the adequacy of micronutrients during pregnancy in the women and their children's health (WATCH) study. Nutrients 2012;4(12):1958-1976.	E	TA												X
410	Blumfield ML, Nowson C, Hure AJ, Smith R, Simpson SJ, Raubenheimer D, et al. Lower protein-to-carbohydrate ratio in maternal diet is associated with higher childhood systolic blood pressure up to age four years. Nutrients 2015;7(5):3078-3093.	E	TA												X
411	Bobes J, Arango C, Garcia-Garcia M, Rejas J. Healthy lifestyle habits and 10-year cardiovascular risk in schizophrenia spectrum disorders: an analysis of the impact of smoking tobacco in the CLAMORS schizophrenia cohort. Schizophr Res 2010;119(1-3):101-9.	E	TA												X
412	Bobo WV, Bonaccorso S, Jayathilake K, Meltzer HY. Prediction of long-term metabolic effects of olanzapine and risperidone treatment from baseline body mass index in schizophrenia and bipolar disorder. Psychiatry Res 2011;189(2):200-7.	E	TA												X
413	Bobowicz M, Lehmann A, Orlowski M, Lech P, Michalik M. Preliminary outcomes 1 year after laparoscopic sleeve gastrectomy based on bariatric analysis and reporting outcome system (BAROS). Obesity Surgery 2011;21(12):1843-1848.	E	TA												X
414	Boden BP, Tacchetti R, Mueller FO. Catastrophic injuries in high school and college baseball players. American Journal of Sports Medicine 2004;32(5):1189-1196.	E	TA												X
415	Bodnar LM, Daftary A, Markovic N, Schatzman CL, Roberts JM. Seasonal variation in gestational blood pressure. Hypertens Pregnancy 2006;25(3):271-83.	E	TA												X
416	Bodnar LM, Wisner KL, Luther JF, Powers RW, Evans RW, Gallaher MJ, et al. An exploratory factor analysis of nutritional biomarkers associated with major depression in pregnancy. Public Health Nutr 2012;15(6):1078-86.	E	TA												X
417	Boffetta P, Islami F, Vedanthan R, Pourshams A, Kamangar F, Khademi H, et al. A U-shaped relationship between haematocrit and mortality in a large prospective cohort study. International Journal of Epidemiology 2013;42(2):601-615.	E	TA												X
418	Bogaert N, Steinbeck KS, Baur LA, Brock K, Bermingham MA. Food, activity and family--environmental vs biochemical predictors of weight gain in children. Eur J Clin Nutr 2003;57(10):1242-9.	E	TA												X
419	Bogaerts A, Van den Bergh BR, Ameye L, Witters I, Martens E, Timmerman D, et al. Interpregnancy weight change and risk for adverse perinatal outcome. Obstet Gynecol 2013;122(5):999-1009.	E	TA												X
420	Boggia J, Thijs L, Li Y, Hansen TW, Kikuya M, Bjorklund-Bodegard K, et al. Risk stratification by 24-hour ambulatory blood pressure and estimated glomerular filtration rate in 5322 subjects from 11 populations. Hypertension 2013;61(1):18-26.	E	TA												X
421	Boissonnat P, Salen P, Guidollet J, Ferrera R, Dureau G, Ninet J, et al. The long-term effects of the lipid-lowering agent fenofibrate in hyperlipidemic heart transplant recipients. Transplantation 1994;58(2):245-247.	E	TA												X
422	Bolding J, Wratchford T, Perkins K, Ogershok P. Prevalence of obesity, acanthosis nigricans and hyperinsulinemia in an adolescent clinic. W V Med J 2005;101(3):112-5.	E	TA												X
423	Bolíbar B, Pareja C, Astier-Pẽa MP, Morán J, Rodríguez-Blanco T, Rosell-Murphy M, et al. Variability in the performance of preventive services and in the degree of control of identified health problems: A primary care study protocol. BMC Public Health 2008;8.	E	TA												X
424	Bolin M, Akerud H, Cnattingius S, Stephansson O, Wikstrom AK. Hyperemesis gravidarum and risks of placental dysfunction disorders: a population-based cohort study. BJOG 2013;120(5):541-7.	E	TA												X
425	Bolisetty S, Naidoo D, Lui K, Koh THHG, Watson D, Montgomery R, et al. Postnatal changes in maternal and neonatal plasma antioxidant vitamins and the influence of smoking. Archives of Disease in Childhood: Fetal and Neonatal Edition 2002;86(1):F36-F40.	E	TA												X
426	Bonanome A, Pagnan A, Caruso D, Toia A, Xamin A, Fedeli E, et al. Evidence of postprandial absorption of olive oil phenols in humans. Nutr Metab Cardiovasc Dis 2000;10(3):111-20.	E	TA												X
427	Boniface DR, Cottee MJ, Neal D, Skinner A. Social and demographic factors predictive of change over seven years in CHD-related behaviours in men aged 18-49 years. Public Health 2001;115(4):246-52.	E	TA												X
428	Bonthuis M, van Stralen KJ, Jager KJ, Baiko S, Jahnukainen T, Laube GF, et al. Dyslipidaemia in children on renal replacement therapy. Nephrol Dial Transplant 2014;29(3):594-603.	E	TA												X
429	Boomsma JM, van Dussen L, Wiersma MG, Groener JE, Aerts JM, Maas M, et al. Spontaneous regression of disease manifestations can occur in type 1 Gaucher disease; results of a retrospective cohort study. Blood Cells Mol Dis 2010;44(3):181-7.	E	TA												X
430	Boon MR, Karamali NS, De Groot CJM, Van Steijn L, Kanhai HH, Van Der Bent C, et al. E-Selectin is elevated in cord blood of south asian neonates compared with caucasian neonates. Journal of Pediatrics 2012;160(5):844-848.e1.	E	TA												X
431	Boreham C, Riddoch C. The physical activity, fitness and health of children. J Sports Sci 2001;19(12):915-29.	E	TA												X
432	Boreham C, Twisk J, Neville C, Savage M, Murray L, Gallagher A. Associations between physical fitness and activity patterns during adolescence and cardiovascular risk factors in young adulthood: The Northern Ireland Young Hearts Project. International Journal of Sports Medicine, Supplement 2002;23(1):S22-S26.	E	TA												X
433	Borghi C, Dormi A, Veronesi M, Sangiorgi Z, Gaddi A. Association between different lipid-lowering treatment strategies and blood pressure control in the Brisighella Heart Study. Am Heart J 2004;148(2):285-92.	E	TA												X
434	Borja JB. The impact of early nutrition on health: key findings from the Cebu Longitudinal Health and Nutrition Survey (CLHNS). Malays J Nutr 2013;19(1):1-8.	E	TA												X
435	Borowiec A, Dabrowski R, Wozniak J, Jasek S, Chwyczko T, Kowalik I, et al. Cardiovascular assessment of asymptomatic patients with juvenile-onset localized and systemic scleroderma: 10 years prospective observation. Scandinavian Journal of Rheumatology 2012;41(1):33-38.	E	TA												X
436	Bortsov AV, Liese AD, Bell RA, Dabelea D, D'Agostino RB, Jr., Hamman RF, et al. Sugar-sweetened and diet beverage consumption is associated with cardiovascular risk factor profile in youth with type 1 diabetes. Acta Diabetol 2011;48(4):275-82.	E	TA												X
437	Borzych D, Bakkaloglu SA, Zaritsky J, Suarez A, Wong W, Ranchin B, et al. Defining Left Ventricular Hypertrophy in Children on Peritoneal Dialysis. Clinical Journal of the American Society of Nephrology 2011;6(8):1934-1943.	E	TA												X
438	Boschi V, Siervo M, D'Orsi P, Margiotta N, Trapanese E, Basile F, et al. Body Composition, Eating Behavior, Food-Body Concerns and Eating Disorders in Adolescent Girls. Annals of Nutrition and Metabolism 2003;47(6):284-293.	E	TA												X
439	Bosnyak Z, Forrest KY, Maser RE, Becker D, Orchard TJ. Do plasminogen activator inhibitor (PAI-1) or tissue plasminogen activator PAI-1 complexes predict complications in Type 1 diabetes: the Pittsburgh Epidemiology of Diabetes Complications Study. Diabet Med 2003;20(2):147-51.	E	TA												X
440	Bossert T, Falk V, Gummert JF, Rahmel A, Mohr FW. Coronary artery bypass grafting in patients with systemic lupus erythematosus. Zeitschrift fur Kardiologie 2003;92(3):219-221.	E	TA												X
441	Bosy-Westphal A, Booke C-A, Bloecker T, Kossel E, Goele K, Later W, et al. Measurement Site for Waist Circumference Affects Its Accuracy As an Index of Visceral and Abdominal Subcutaneous Fat in a Caucasian Population. Journal of Nutrition 2010;140(5):954-961.	E	TA												X
442	Böttner A, Kratzsch J, Müller G, Kapellen TM, Blüher S, Keller E, et al. Gender differences of adiponectin levels develop during the progression of puberty and are related to serum androgen levels. Journal of Clinical Endocrinology and Metabolism 2004;89(8):4053-4061.	E	TA												X
443	Bottomley C, Van Belle V, Kirk E, Van Huffel S, Timmerman D, Bourne T. Accurate prediction of pregnancy viability by means of a simple scoring system. Human Reproduction 2013;28(1):68-76.	E	TA												X
444	Bouaziz JD, Barete S, Le Pelletier F, Amoura Z, Piette JC, Frances C. Cutaneous lesions of the digits in systemic lupus erythematosus: 50 cases. Lupus 2007;16(3):163-167.	E	TA												X
445	Bouhanick B, Ehlinger V, Delpierre C, Chamontin B, Lang T, Kelly-Irving M. Mode of delivery at birth and the metabolic syndrome in midlife: The role of the birth environment in a prospective birth cohort study. BMJ Open 2014;4(5).	E	TA												X
446	Bouillon R, Van Schoor NM, Gielen E, Boonen S, Mathieu C, Vanderschueren D, et al. Optimal Vitamin D Status: A Critical Analysis on the Basis of Evidence-Based Medicine. Journal of Clinical Endocrinology & Metabolism 2013;98(8):E1283-E1304.	E	TA												X
447	Bouthoorn SH, Van Lenthe FJ, De Jonge LL, Hofman A, Van Osch-Gevers L, Jaddoe VW, et al. Maternal educational level and blood pressure, aortic stiffness, cardiovascular structure and functioning in childhood: the generation R study. Am J Hypertens 2014;27(1):89-98.	E	TA												X
448	Bouziotas C, Koutedakis Y, Nevill A, Ageli E, Tsigilis N, Nikolaou A, et al. Greek adolescents, fitness, fatness, fat intake, activity, and coronary heart disease risk. Arch Dis Child 2004;89(1):41-4.	E	F		X
449	Bowen ME. Childhood socioeconomic status and racial differences in disability: evidence from the Health and Retirement Study (1998-2006). Soc Sci Med 2009;69(3):433-41.	E	TA												X
450	Bowles HR, FitzGerald SJ, Morrow JR, Jr., Jackson AW, Blair SN. Construct validity of self-reported historical physical activity. Am J Epidemiol 2004;160(3):279-86.	E	TA												X
451	Boyd IW, McEwen J, Calcino LJ, Zhang JY, Walsh RL. Co-dispensing of contraindicated drugs with cisapride. Journal of Pharmacy Practice and Research 2008;38(1):23-27.	E	TA												X
452	Boyle KE, Hwang H, Janssen RC, DeVente JM, Barbour LA, Hernandez TL, et al. Gestational diabetes is characterized by reduced mitochondrial protein expression and altered calcium signaling proteins in skeletal muscle. PLoS One 2014;9(9):e106872.	E	TA												X
453	Boyne MS, Osmond C, Fraser RA, Reid M, Taylor-Bryan C, Soares-Wynter S, et al. Developmental origins of cardiovascular risk in Jamaican children: the Vulnerable Windows Cohort study. Br J Nutr 2010;104(7):1026-33.	E	TA												X
454	Boyne MS, Thame M, Osmond C, Fraser RA, Gabay L, Taylor-Bryan C, et al. The effect of earlier puberty on cardiometabolic risk factors in Afro-Caribbean children. J Pediatr Endocrinol Metab 2014;27(5-6):453-60.	E	TA												X
455	Boynton-Jarrett R, Rosenberg L, Palmer JR, Boggs DA, Wise LA. Child and Adolescent Abuse in Relation to Obesity in Adulthood: The Black Women's Health Study. Pediatrics 2012;130(2):245-253.	E	TA												X
456	Bozorgmanesh M, Hadaegh F, Azizi F. Diabetes prediction, lipid accumulation product, and adiposity measures; 6-year follow-up: Tehran lipid and glucose study. Lipids Health Dis 2010;9:45.	E	TA		X										X	baseline age >=20
457	Bradbury KE, Skeaff CM, Crowe FL, Green TJ, Hodson L. Serum fatty acid reference ranges: percentiles from a New Zealand national nutrition survey. Nutrients 2011;3(1):152-63.	E	TA												X
458	Bradman A, Castorina R, Sjodin A, Fenster L, Jones RS, Harley KG, et al. Factors associated with serum polybrominated diphenyl ether (PBDE) levels among school-age children in the CHAMACOS cohort. Environ Sci Technol 2012;46(13):7373-81.	E	TA												X
459	Brady TM, Schneider MF, Flynn JT, Cox C, Samuels J, Saland J, et al. Carotid intima-media thickness in children with CKD: results from the CKiD study. Clin J Am Soc Nephrol 2012;7(12):1930-7.	E	TA												X
460	Braga GC, Brito MB, Ferriani RA, Oliveira LC, Garcia AA, Pintao MC, et al. Oral anticoagulant therapy does not modify the bleeding pattern associated with the levonorgestrel-releasing intrauterine system in women with thrombophilia and/or a history of thrombosis. Contraception 2014;89(1):48-53.	E	TA												X
461	Brambilla P, Antolini L, Street ME, Giussani M, Galbiati S, Valsecchi MG, et al. Adiponectin and hypertension in normal-weight and obese children. American Journal of Hypertension 2013;26(2):257-264.	E	TA												X
462	Brambilla P, Manzoni P, Agostini G, Beccaria L, Ruotolo G, Sironi S, et al. Persisting obesity starting before puberty is associated with stable intraabdominal fat during adolescence. Int J Obes Relat Metab Disord 1999;23(3):299-303.	E	F												X	Longitudinal study of 16 obese adolescents
463	Brambilla P, Pietrobelli A. Behind and beyond the pediatric metabolic syndrome. Italian Journal of Pediatrics 2009;35(41).	E	F					X							X
464	Bramlage P, Bramlage C, Kirch W. [Antihypertensive drug utilization in obese patients]. Med Klin (Munich) 2005;100(12):804-9.	E	TA												X
465	Brancati F, D'Avanzo MG, Digilio MC, Sarkozy A, Biondi M, De Brasi D, et al. KBG syndrome in a cohort of Italian patients. American Journal of Medical Genetics Part A 2004;131A(2):144-149.	E	TA												X
466	Brancatisano A, Wahlroos S, Brancatisano R. Improvement in comorbid illness after placement of the Swedish Adjustable Gastric Band. Surgery for Obesity and Related Diseases 2008;4(3 SUPPL.):S39-S46.	E	TA												X
467	Brandao MP, Pimentel FL, Cardoso MF. Impact of academic exposure on health status of university students. Revista De Saude Publica 2011;45(1):49-58.	E	TA												X
468	Brandt S, Moß A, Koenig W, Rothenbacher D, Brenner H, Wabitsch M. Intrafamilial associations of cardiometabolic risk factors - Results of the Ulm Birth Cohort Study. Atherosclerosis 2015;240(1):174-183.	E	F												X
469	Brannon SD, Tershakovec AM, Shannon BM. The cost-effectiveness of alternative methods of nutrition education for hypercholesterolemic children. Am J Public Health 1997;87(12):1967-70.	E	TA												X
470	Brasil AS, Pereira AC, Wanderley LT, Kim CA, Malaquias AC, Jorge AAL, et al. PTPN11 and KRAS Gene Analysis in Patients with Noonan and Noonan-Like Syndromes. Genetic Testing and Molecular Biomarkers 2010;14(3):425-432.	E	TA												X
471	Brathwaite N, Fraser HS, Modeste N, Broome H, King R. Obesity, diabetes, hypertension, and vegetarian status among Seventh-Day Adventists in Barbados: preliminary results. Ethn Dis 2003;13(1):34-9.	E	TA												X
472	Braun JM, Hauser R. Bisphenol A and children's health. Current Opinion in Pediatrics 2011;23(2):233-239.	E	TA												X
473	Bray I, Gunnell D, Holly JMP, Middleton N, Smith GD, Martin RM. Associations of childhood and adulthood height and the components of height with insulin-like growth factor levels in adulthood: A 65-year follow-up of the Boyd Orr cohort. Journal of Clinical Endocrinology & Metabolism 2006;91(4):1382-1389.	E	TA												X
474	Bray M, Pomeroy J, Knowler WC, Bersamin A, Hopkins S, Brage S, et al. Simple anthropometrics are more correlated with health variables than are estimates of body composition in Yup'ik people. Obesity (Silver Spring) 2013;21(9):E435-8.	E	F		X
475	Brborovic O, Rukavina TV, Fazlic H, Vuletic S, Kern J, Pavlekovic G. Case oriented approach to co-occurrence of risk lifestyle behavior with overweight, excess abdominal fat and high blood pressure: the CroHort study. Coll Antropol 2012;36 Suppl 1:15-9.	E	TA												X
476	Brema I, Hatunic M, Finucane F, Burns N, Nolan JJ, Haider D, et al. Plasma visfatin is reduced after aerobic exercise in early onset type 2 diabetes mellitus. Diabetes, Obesity and Metabolism 2008;10(7):600-602.	E	TA												X
477	Breukhoven PE, Kerkhof GF, Willemsen RH, Hokken-Koelega AC. Fat mass and lipid profile in young adults born preterm. J Clin Endocrinol Metab 2012;97(4):1294-302.	E	TA												X
478	Brewin D, Nannini A. Using a life course model to examine racial disparities in low birth weight during adolescence and young adulthood. J Midwifery Womens Health 2014;59(4):417-27.	E	TA												X
479	Brienza C, Grandone A, Di Salvo G, Corona AM, Di Sessa A, Pascotto C, et al. Subclinical hypothyroidism and myocardial function in obese children. Nutr Metab Cardiovasc Dis 2013;23(9):898-902.	E	TA												X
480	Briesacher BA, Andrade SE, Fouayzi H, Chan A. Comparison of drug adherence rates among patients with seven different medical conditions. Pharmacotherapy 2008;28(4):437-443.	E	TA												X
481	Briese V, Muller H, Stiete H. [Cholesterol, HDL-cholesterol, triglycerides and beta-lipoprotein in diabetic pregnancy]. Zentralbl Gynakol 1995;117(1):17-22.	E	TA												X
482	Brisson D, Perron P, Kahn HS, Gaudet D, Bouchard L. The lipid accumulation product for the early prediction of gestational insulin resistance and glucose dysregulation. Journal of Women's Health 2013;22(4):362-367.	E	TA												X
483	Brite J, Laughon SK, Troendle J, Mills J. Maternal overweight and obesity and risk of congenital heart defects in offspring. Int J Obes (Lond) 2014;38(6):878-82.	E	TA												X
484	Brixval CS, Andersen LB, Heitmann BL. Fat intake and weight development from 9 to 16 years of age: the European youth heart study - a longitudinal study. Obes Facts 2009;2(3):166-70.	E	TA												X
485	Broderick JP, Viscoli CM, Brott T, Kernan WN, Brass LM, Feldmann E, et al. Major risk factors for aneurysmal subarachnoid hemorrhage in the young are modifiable. Stroke 2003;34(6):1375-81.	E	TA												X
486	Brodersen NH, Steptoe A, Boniface DR, Wardle J. Trends in physical activity and sedentary behaviour in adolescence: ethnic and socioeconomic differences. Br J Sports Med 2007;41(3):140-4.	E	TA												X
487	Brodie AM, Lucas RM, Harrison SL, van der Mei IAF, Armstrong B, Kricker A, et al. The AusD Study: A Population-based Study of the Determinants of Serum 25-Hydroxyvitamin D Concentration Across a Broad Latitude Range. American Journal of Epidemiology 2013;177(9):894-903.	E	TA												X
488	Broe R, Rasmussen ML, Frydkjaer-Olsen U, Olsen BS, Mortensen HB, Peto T, et al. Retinal vascular fractals predict long-term microvascular complications in type 1 diabetes mellitus: the Danish Cohort of Pediatric Diabetes 1987 (DCPD1987). Diabetologia 2014;57(10):2215-2221.	E	TA												X
489	Bronsky J, Mitrova K. Adiponectin, adipocyte fatty acid-binding protein and leptin in human breast milk and impact in the infant. In: Handbook of Dietary and Nutritional Aspects of Human Breast Milk; 2013. p. 387-400.	E	TA												X
490	Brothers J, McBride M, Paridon A, Zhang X, Paridon S. Fatness is not a factor of fitness: Analysis of cardiorespiratory data from healthy children over an 8-year period. Cardiology in the Young 2013;23(1):47-53.	E	F												X
491	Brotons C, Maiques A, Mostaza J, Pinto X, Vilaseca J. [Lipid control in secondary prevention: multicenter observational study in primary care]. Aten Primaria 2004;34(2):81-6.	E	TA												X
492	Brouwer BG, Visseren FLJ, Stolk RP, Van Der Graaf Y. Abdominal fat and risk of coronary heart disease in patients with peripheral arterial disease. Obesity 2007;15(6):1623-1630.	E	TA												X
493	Brown A, Carrington MJ, McGrady M, Lee G, Zeitz C, Krum H, et al. Cardiometabolic risk and disease in Indigenous Australians: The heart of the heart study. International Journal of Cardiology 2014;171(3):377-383.	E	TA												X
494	Brown CVR, Daigle JB, Foulkrod KH, Brouillette B, Clark A, Czysz C, et al. Risk Factors Associated With Early Reintubation in Trauma Patients: A Prospective Observational Study. Journal of Trauma-Injury Infection and Critical Care 2011;71(1):37-41.	E	TA												X
495	Brown DE, Mautz WJ, Warrington M, Allen L, Tefft HA, Gotshalk L, et al. Relation between C-reactive protein levels and body composition in a multiethnic sample of school children in Hawaii. Am J Hum Biol 2010;22(5):675-9.	E	TA												X
496	Brown KH, Akhtar NA, Robertson AD, Ahmed MG. Lactational capacity of marginally nourished mothers: relationships between maternal nutritional status and quantity and proximate composition of milk. Pediatrics 1986;78(5):909-19.	E	TA												X
497	Brown WJ, Mishra G, Kenardy J, Dobson A. Relationships between body mass index and well-being in young Australian women. Int J Obes Relat Metab Disord 2000;24(10):1360-8.	E	TA												X
498	Brown WM, Beck SR, Lange EM, Davis CC, Kay CM, Langefeld CD, et al. Age-stratified heritability estimation in the Framingham Heart Study families. BMC Genet 2003;4 Suppl 1:S32.	E	TA												X
499	Brownie E, Cusick RA, Perry DA, Allbery S, Azarow KS. Pathologic changes in biliary dyskinesia. J Pediatr Surg 2011;46(5):879-82.	E	TA												X
500	Brownlee IA, Moore C, Chatfield M, Richardson DP, Ashby P, Kuznesof SA, et al. Markers of cardiovascular risk are not changed by increased whole-grain intake: the WHOLEheart study, a randomised, controlled dietary intervention. Br J Nutr 2010;104(1):125-34.	E	TA												X
501	Brucato A, Astori MG, Cimaz R, Villa P, Destri ML, Chimini L, et al. Normal neuropsychological development in children with congenital complete heart block who may or may not be exposed to high-dose dexamethasone in utero. Annals of the Rheumatic Diseases 2006;65(11):1422-1426.	E	TA												X
502	Brucato A, Shinar Y, Brambilla G, Robbiolo L, Ferrioli G, Patrosso MC, et al. Idiopathic recurrent acute pericarditis: familial Mediterranean fever mutations and disease evolution in a large cohort of Caucasian patients. Lupus 2005;14(9):670-674.	E	TA												X
503	Bruce BB, Kedar S, Van Stavern GP, Corbett JJ, Newman NJ, Biousse V. Atypical idiopathic intracranial hypertension Normal BMI and older patients. Neurology 2010;74(22):1827-1832.	E	TA												X
504	Bruckert E, Hayem G, Dejager S, Yau C, Begaud B. Mild to moderate muscular symptoms with high-dosage statin therapy in hyperlipidemic patients - The PRIMO study. Cardiovascular Drugs and Therapy 2005;19(6):403-414.	E	TA												X
505	Bruckner R, Batschelet E, Hugenschmidt F. The Basel longitudinal study on aging (1955-1978). Ophthalmo-gerontological research results. Doc Ophthalmol 1986;64(3):235-310.	E	TA												X
506	Brumbaugh DE, Crume TL, Nadeau K, Scherzinger A, Dabelea D. Intramyocellular lipid is associated with visceral adiposity, markers of insulin resistance, and cardiovascular risk in prepubertal children: the EPOCH study. J Clin Endocrinol Metab 2012;97(7):E1099-105.	E	F												X	Children aged 6–13
507	Brumby S, Chandrasekara A, McCoombe S, Kremer P, Lewandowski P. Cardiovascular risk factors and psychological distress in Australian farming communities. Aust J Rural Health 2012;20(3):131-7.	E	TA												X
508	Brumby S, Chandrasekara A, McCoombe S, Torres S, Kremer P, Lewandowski P. Reducing psychological distress and obesity in Australian farmers by promoting physical activity. BMC Public Health 2011;11:362.	E	TA												X
509	Brumby S, Kennedy A, Chandrasekara A. Alcohol consumption, obesity, and psychological distress in farming communities-an Australian study. J Rural Health 2013;29(3):311-9.	E	TA												X
510	Brummett BH, Babyak MA, Siegler IC, Shanahan M, Harris KM, Elder GH, et al. Systolic blood pressure, socioeconomic status, and biobehavioral risk factors in a nationally representative US young adult sample. Hypertension 2011;58(2):161-6.	E	F		X
511	Brummett BH, Babyak MA, Singh A, Jiang R, Williams RB, Harris KM, et al. Socioeconomic indices as independent correlates of C-reactive protein in the National Longitudinal Study of Adolescent Health. Psychosom Med 2013;75(9):882-93.	E	TA												X
512	Brummett BH, Babyak MB, Siegler IC, Surwit R, Georgiades A, Boyle SH, et al. Systolic blood pressure and adiposity: examination by race and gender in a nationally representative sample of young adults. Am J Hypertens 2012;25(2):140-4.	E	F		X
513	Brunner E, Shipley MJ, Blane D, Davey Smith G, Marmot MG. When does cardiovascular risk start? Past and present socioeconomic circumstances and risk factors in adulthood. Journal of Epidemiology and Community Health 1999;53(12):757-764.	E	TA												X
514	Brunner J, Bronisch T, Pfister H, Jacobi F, Hofler M, Wittchen H-U. High cholesterol, triglycerides, and body-mass index in suicide attempters. Archives of suicide research : official journal of the International Academy for Suicide Research 2006;10(1):1-9.	E	F		X										X
515	Bruno G, Pagano G. Low prevalence of microalbuminuria in young Italian insulin-dependent diabetic patients with short duration of disease: A population-based study. Diabetic Medicine 1996;13(10):889-893.	E	TA												X
516	Bruschi Kelles SM, Barreto SM, Guerra HL. Mortality and Hospital Stay After Bariatric Surgery in 2,167 Patients: Influence of the Surgeon Expertise. Obesity Surgery 2009;19(9):1228-1235.	E	TA												X
517	Bruunsgaard H. A high plasma concentration of tnf-α is associated with dementia in centenarians. Journals of Gerontology - Series A Biological Sciences and Medical Sciences 1999;54(7):M357-M364.	E	TA												X
518	Bruunsgaard H, Pedersen AN, Schroll M, Skinhoj P, Pedersen BK. Impaired production of proinflammatory cytokines in response to lipopolysaccharide (LPS) stimulation in elderly humans. Clin Exp Immunol 1999;118(2):235-41.	E	TA												X
519	Bryan AD, Magnan RE, Hooper AE, Ciccolo JT, Marcus B, Hutchison KE. Colorado stride (COSTRIDE): testing genetic and physiological moderators of response to an intervention to increase physical activity. Int J Behav Nutr Phys Act 2013;10:139.	E	TA												X
520	Bryner RW, Toffle RC, Ullrich IH, Yeater RA. The effects of exercise intensity on body composition, weight loss, and dietary composition in women. J Am Coll Nutr 1997;16(1):68-73.	E	TA												X
521	Bryson GL, Chung F, Cox RG, Crowe MJ, Fuller J, Henderson C, et al. Patient selection in ambulatory anesthesia - An evidence-based review: Part II. Canadian Journal of Anesthesia 2004;51(8):782-794.	E	TA												X
522	Buber J, Assenza GE, Huang A, Valente AM, Emani SM, Gauvreau K, et al. Durability of large diameter right ventricular outflow tract conduits in adults with congenital heart disease. Int J Cardiol 2014;175(3):455-63.	E	TA												X
523	Bucher HC, Richter W, Glass TR, Magenta L, Wang Q, Cavassini M, et al. Small dense lipoproteins, apolipoprotein B, and risk of coronary events in HIV-infected patients on antiretroviral therapy: the Swiss HIV Cohort Study. J Acquir Immune Defic Syndr 2012;60(2):135-42.	E	TA												X
524	Buchsbaum GM, Chin M, Glantz C, Guzick D. Prevalence of urinary incontinence and associated risk factors in a cohort of nuns. Obstet Gynecol 2002;100(2):226-9.	E	TA												X
525	Buck Louis GM, Chen Z, Peterson CM, Hediger ML, Croughan MS, Sundaram R, et al. Persistent lipophilic environmental chemicals and endometriosis: the ENDO Study. Environ Health Perspect 2012;120(6):811-6.	E	TA												X
526	Buck Louis GM, Rios LI, McLain A, Cooney MA, Kostyniak PJ, Sundaram R. Persistent organochlorine pollutants and menstrual cycle characteristics. Chemosphere 2011;85(11):1742-8.	E	TA												X
527	Buck Louis GM, Sundaram R, Schisterman EF, Sweeney AM, Lynch CD, Gore-Langton RE, et al. Heavy metals and couple fecundity, the LIFE Study. Chemosphere 2012;87(11):1201-7.	E	TA												X
528	Buckalew Jr VM, Berg RL, Wang SR, Porush JG, Rauch S, Schulman G. Prevalence of hypertension in 1,795 subjects with chronic renal disease: The modification of diet in renal disease study baseline cohort. American Journal of Kidney Diseases 1996;28(6):811-821.	E	TA												X
529	Buckley J, Tucker G, Hugo G, Wittert G, Adams RJ, Wilson DH. The Australian baby boomer population--factors influencing changes to health-related quality of life over time. J Aging Health 2013;25(1):29-55.	E	TA												X
530	Buechel RR, Pazhenkottil AP, Herzog BA, Brueckner M, Nkoulou R, Ghadri JR, et al. Prognostic performance of low-dose coronary CT angiography with prospective ECG triggering. Heart 2011;97(17):1385-1390.	E	TA												X
531	Bueno AC, Espineira AR, Fernandes-Rosa FL, de Souza RM, de Castro M, Moreira AC, et al. Adiponectin: serum levels, promoter polymorphism, and associations with birth size and cardiometabolic outcome in young adults born large for gestational age. Eur J Endocrinol 2010;162(1):53-60.	E	TA												X
532	Buerba RA, Giles E, Webb ML, Fu MC, Gvozdyev B, Grauer JN. Increased Risk of Complications After Anterior Cervical Discectomy and Fusion in the Elderly. Spine 2014;39(25):2062-2069.	E	TA												X
533	Buergin-Wolff A, Signer E, Friess HM, Berger R, Birbaumer A, Just M. The Diagnostic Significance of Antibodies to Various Cows Milk Proteins Fluorescent Immuno Sorbent Test. European Journal of Pediatrics 1980;133(1):17-24.	E	TA												X
534	Buesst CJ, Bloomer LDS, Scurrah KJ, Ellis JA, Barnes TA, Charchar FJ, et al. The Epithelial Sodium Channel gamma-Subunit Gene and Blood Pressure Family Based Association, Renal Gene Expression, and Physiological Analyses. Hypertension 2011;58(6):1073-U209.	E	TA												X
535	Bueter M, Dubb SS, Gill A, Joannou L, Ahmed A, Frankel AH, et al. Renal cytokines improve early after bariatric surgery. Br J Surg 2010;97(12):1838-44.	E	TA												X
536	Buettner R, Bollheimer LC, Zietz B, Drobnik W, Lackner K, Schmitz G, et al. Definition and characterization of relative hypo- and hyperleptinemia in a large Caucasian population. Journal of Endocrinology 2002;175(3):745-756.	E	TA												X
537	Bugg GJ, Atwal GS, Maresh M. Grandmultiparae in a modern setting. BJOG: An International Journal of Obstetrics and Gynaecology 2002;109(3):249-253.	E	TA												X
538	Bulatova N, Yousef AM, Al-Khayyat G, Qosa H. Adverse effects of tacrolimus in renal transplant patients from living donors. Current Drug Safety 2011;6(1):3-11.	E	TA												X
539	Bullington N, Kartel J, Khoury P, Mitsnefes M. Left ventricular hypertrophy in pediatric kidney transplant recipients: long-term follow-up study. Pediatr Transplant 2006;10(7):811-5.	E	TA												X
540	Bulum T, Kolaric B, Duvnjak L. Insulin sensitivity modifies the relationship between thyroid function and lipid profile in euthyroid type 1 diabetic patients. Endocrine 2012;42(1):139-45.	E	TA												X
541	Burch LR, Donnelly LA, Doney ASF, Brady J, Tommasi AM, Whitley AL, et al. Peroxisome Proliferator-Activated Receptor-delta Genotype Influences Metabolic Phenotype and May Influence Lipid Response to Statin Therapy in Humans: A Genetics of Diabetes Audit and Research Tayside Study. Journal of Clinical Endocrinology & Metabolism 2010;95(4):1830-1837.	E	TA												X
542	Burgert TS, Taksali SE, Dziura J, Goodman TR, Yeckel CW, Papademetris X, et al. Alanine aminotransferase levels and fatty liver in childhood obesity: associations with insulin resistance, adiponectin, and visceral fat. J Clin Endocrinol Metab 2006;91(11):4287-94.	E	TA												X
543	Burgos PI, McGwin G, Jr., Reveille JD, Vila LM, Alarcon GS. Factors predictive of thrombotic events in LUMINA, a multi-ethnic cohort of SLE patients (LXXII). Rheumatology 2010;49(9):1720-1725.	E	TA												X
544	Burgos PI, McGwin G, Jr., Reveille JD, Vila LM, Brown EE, Alarcon GS. Is familial lupus different from sporadic lupus? Data from LUMINA (LXXIII), a multiethnic US cohort. Lupus 2010;19(11):1331-1336.	E	TA												X
545	Burgos PI, Vila LM, Reveille JD, Alarcon GS. Peripheral vascular damage in systemic lupus erythematosus: data from LUMINA, a large multi-ethnic US cohort (LXIX). Lupus 2009;18(14):1303-1308.	E	TA												X
546	Burke GL, Arcilla RA, Culpepper WS, Webber LS, Chiang YK, Berenson GS. Blood-Pressure and Echocardiographic Measures in Children - the Bogalusa Heart-Study. Circulation 1987;75(1):106-114.	E	F												X
547	Burke GL, Bild DE, Hilner JE, Folsom AR, Wagenknecht LE, Sidney S. Differences in weight gain in relation to race, gender, age and education in young adults: The CARDIA study. Ethnicity and Health 1996;1(4):327-335.	E	TA												X
548	Burke LE, Styn MA, Glanz K, Ewing LJ, Elci OU, Conroy MB, et al. SMART trial: A randomized clinical trial of self-monitoring in behavioral weight management-design and baseline findings. Contemporary Clinical Trials 2009;30(6):540-551.	E	TA												X
549	Burke V, Beilin LJ, Blake KV, Doherty D, Kendall GE, Newnham JP, et al. Indicators of fetal growth do not independently predict blood pressure in 8-year-old Australians: a prospective cohort study. Hypertension 2004;43(2):208-13.	E	TA												X
550	Burke V, Beilin LJ, Dunbar D, Kevan M. Changes in health-related behaviours and cardiovascular risk factors in young adults: associations with living with a partner. Prev Med 2004;39(4):722-30.	E	TA												X
551	Burke V, Beilin LJ, Dunbar D, Kevan M. Associations between blood pressure and overweight defined by new standards for body mass index in childhood. Prev Med 2004;38(5):558-64.	E	F												X	AGE 25 was inlcuded and not the BMI at one of the early ages
552	Burke V, Beilin LJ, Milligan R, Thompson C. Assessment of nutrition and physical activity education programmes in children. Clin Exp Pharmacol Physiol 1995;22(3):212-6.	E	TA												X
553	Burke V, Lee AH, Hunter E, Spargo R, Smith R, Beilin LJ, et al. Alcohol intake and incidence of coronary in Australian aborigines. Alcohol and Alcoholism 2007;42(1):49-54.	E	TA												X
554	Burns JC, Touma R, Song Y, Padilla RL, Tremoulet AH, Sidney J, et al. Fine specificities of natural regulatory T cells after IVIG therapy in patients with Kawasaki disease. Autoimmunity 2015;48(3):181-188.	E	TA												X
555	Burns JS, Williams PL, Korrick SA, Hauser R, Sergeyev O, Revich B, et al. Association between chlorinated pesticides in the serum of prepubertal Russian boys and longitudinal biomarkers of metabolic function. Am J Epidemiol 2014;180(9):909-19.	E	TA												X
556	Burns JS, Williams PL, Sergeyev O, Korrick S, Lee MM, Revich B, et al. Serum dioxins and polychlorinated biphenyls are associated with growth among Russian boys. Pediatrics 2011;127(1):e59-e68.	E	TA												X
557	Burns JS, Williams PL, Sergeyev O, Korrick S, Lee MM, Revich B, et al. Predictors of Serum Dioxins and PCBs among Peripubertal Russian Boys. Environmental Health Perspectives 2009;117(10):1593-1599.	E	TA												X
558	Burns JS, Williams PL, Sergeyev O, Korrick SA, Lee MM, Revich B, et al. Serum concentrations of organochlorine pesticides and growth among Russian boys. Environ Health Perspect 2012;120(2):303-8.	E	TA												X
559	Burns SF, Lee SJ, Arslanian SA. Surrogate lipid markers for small dense low-density lipoprotein particles in overweight youth. Journal of Pediatrics 2012;161(6):991-996.	E	F		X										X	ROC curve
560	Burns TL, Letuchy EM, Paulos R, Witt J. Childhood predictors of the metabolic syndrome in middle-aged adults: the Muscatine study. J Pediatr 2009;155(3):S5 e17-26.	E	F													Difficult to seperate the syndrom to BP and lipid profille
561	Burris HH, Rifas-Shiman SL, Huh SY, Kleinman K, Litonjua AA, Oken E, et al. Vitamin D status and hypertensive disorders in pregnancy. Ann Epidemiol 2014;24(5):399-403 e1.	E	TA												X
562	Burris J, Rietkerk W, Woolf K. Relationships of self-reported dietary factors and perceived acne severity in a cohort of New York young adults. J Acad Nutr Diet 2014;114(3):384-92.	E	TA												X
563	Burrowes JD, Russell GB, Unruh M, Rocco MV. Is nutritional status associated with self-reported sleep quality in the HEMO study cohort? J Ren Nutr 2012;22(5):461-71.	E	TA												X
564	Buscemi D, Kumar A, Nugent R, Nugent K. Short sleep times predict obesity in internal medicine clinic patients. Journal of Clinical Sleep Medicine 2007;3(7):681-688.	E	TA												X
565	Buscemi S, Batsis JA, Verga S, Carciola T, Mattina A, Citarda S, et al. Long-term effects of a multidisciplinary treatment of uncomplicated obesity on carotid intima-media thickness. Obesity (Silver Spring) 2011;19(6):1187-92.	E	TA												X
566	Buscemi S, Canino B, Batsis JA, Buscemi C, Calandrino V, Mattina A, et al. Relationships between maximal oxygen uptake and endothelial function in healthy male adults: a preliminary study. Acta Diabetol 2013;50(2):135-41.	E	TA												X
567	Buscemi S, Nicolucci A, Mattina A, Rosafio G, Massenti FM, Lucisano G, et al. Association of dietary patterns with insulin resistance and clinically silent carotid atherosclerosis in apparently healthy people. Eur J Clin Nutr 2013;67(12):1284-90.	E	TA												X
568	Buscemi S, Sprini D, Grosso G, Galvano F, Nicolucci A, Lucisano G, et al. Impact of lifestyle on metabolic syndrome in apparently healthy people. Eating and Weight Disorders 2014;19(2):225-232.	E	TA												X
569	Buscemi S, Verga S, Caimi G, Cerasola G. Low relative resting metabolic rate and body weight gain in adult Caucasian Italians. Int J Obes (Lond) 2005;29(3):287-91.	E	TA												X
570	Buse DC, Manack A, Serrano D, Turkel C, Lipton RB. Sociodemographic and comorbidity profiles of chronic migraine and episodic migraine sufferers. Journal of Neurology Neurosurgery and Psychiatry 2010;81(4):428-432.	E	TA												X
571	Buse JB, Rubin CJ, Frederich R, Viraswami-Appanna K, Lin KC, Montoro R, et al. Muraglitazar, a dual (alpha/gamma) PPAR activator: A randomized, double-blind, placebo-controlled, 24-week monotherapy trial in adult patients with type 2 diabetes. Clinical Therapeutics 2005;27(8):1181-1195.	E	TA												X
572	Busst CJ, Bloomer LD, Scurrah KJ, Ellis JA, Barnes TA, Charchar FJ, et al. The epithelial sodium channel gamma-subunit gene and blood pressure: family based association, renal gene expression, and physiological analyses. Hypertension 2011;58(6):1073-8.	E	TA												X
573	Büsst CJ, Bloomer LDS, Scurrah KJ, Ellis JA, Barnes TA, Charchar FJ, et al. The epithelial sodium channel γ-subunit gene and blood pressure: Family based association, renal gene expression, and physiological analyses. Hypertension 2011;58(6):1073-1078.	E	TA												X
574	Butler MG, Bittel DC, Kibiryeva N, Garg U. C-reactive protein levels in subjects with Prader-Willi syndrome and obesity. Genet Med 2006;8(4):243-8.	E	TA												X
575	Butte NF, Cai G, Cole SA, Comuzzie AG. Viva la Familia Study: Genetic and environmental contributions to childhood obesity and its comorbidities in the Hispanic population. American Journal of Clinical Nutrition 2006;84(3):646-654.	E	TA												X
576	Butwick AJ, Carvalho B, El-Sayed YY. Risk factors for obstetric morbidity in patients with uterine atony undergoing caesarean delivery. Br J Anaesth 2014;113(4):661-8.	E	TA												X
577	Buxton JL, Walters RG, Visvikis-Siest S, Meyre D, Froguel P, Blakemore AI. Childhood obesity is associated with shorter leukocyte telomere length. J Clin Endocrinol Metab 2011;96(5):1500-5.	E	TA												X
578	Byberg L, Kilander L, Lemming EW, Michaëlsson K, Vessby B. Cancer death is related to high palmitoleic acid in serum and to polymorphisms in the SCD-1 gene in healthy Swedish men. American Journal of Clinical Nutrition 2014;99(3):551-558.	E	TA												X
579	Byrne J, Fears TR, Mills JL, Zeltzer LK, Sklar C, Nicholson HS, et al. Fertility in women treated with cranial radiotherapy for childhood acute lymphoblastic leukemia. Pediatric Blood & Cancer 2004;42(7):589-597.	E	TA		X										X
580	Caballeria L, Antonia Auladell M, Toran P, Pera G, Miranda D, Aluma A, et al. Risk factors associated with non-alcoholic fatty liver disease in subjects from primary care units. A case-control study. Bmc Gastroenterology 2008;8.	E	TA												X
581	Cabrera de Leon A, Rodriguez Perez Mdel C, Almeida Gonzalez D, Dominguez Coello S, Aguirre Jaime A, Brito Diaz B, et al. [Presentation of the "CDC de Canarias" cohort: objectives, design and preliminary results]. Rev Esp Salud Publica 2008;82(5):519-34.	E	TA												X
582	Cadario F, Prodam F, Pasqualicchio S, Bellone S, Bonsignori I, Demarchi I, et al. Lipid profile and nutritional intake in children and adolescents with Type 1 diabetes improve after a structured dietician training to a Mediterranean-style diet. Journal of Endocrinological Investigation 2012;35(2):160-168.	E	TA												X
583	Cade JE, Burley VJ, Greenwood DC. The UK Women's Cohort Study: comparison of vegetarians, fish-eaters and meat-eaters. Public Health Nutr 2004;7(7):871-8.	E	TA												X
584	Caggiula AW, Mustad VA. Effects of dietary fat and fatty acids on coronary artery disease risk and total and lipoprotein cholesterol concentrations: epidemiologic studies. Am J Clin Nutr 1997;65(5 Suppl):1597S-1610S.	E	TA												X
585	Cahill AG, Roehl KA, Odibo AO, Macones GA. Association and prediction of neonatal acidemia. American Journal of Obstetrics and Gynecology 2012;207(3).	E	TA												X
586	Calderón-Larrañaga A, Hernández-Olivan P, González-Rubio F, Gimeno-Feliu LA, Poblador-Plou B, Prados-Torres A. Multimorbidity and weight loss in obese primary care patients: Longitudinal study based on electronic healthcare records. BMJ Open 2015;5(3).	E	F												X
587	Calhoun D, Beals J, Carter EA, Mete M, Welty TK, Fabsitz RR, et al. Relationship between glycemic control and depression among American Indians in the Strong Heart Study. J Diabetes Complications 2010;24(4):217-22.	E	TA												X
588	Cali AM, Zern TL, Taksali SE, de Oliveira AM, Dufour S, Otvos JD, et al. Intrahepatic fat accumulation and alterations in lipoprotein composition in obese adolescents: a perfect proatherogenic state. Diabetes Care 2007;30(12):3093-8.	E	TA		X
589	Cali AMG, Caprio S. Ectopic fat deposition and the metabolic syndrome in obese children and adolescents. Hormone Research 2009;71(SUPPL. 1):2-7.	E	TA		X
590	Caliendo M, Lee WS. Fat chance! Obesity and the transition from unemployment to employment. Economics and Human Biology 2013;11(2):121-133.	E	TA												X
591	Calkins K, Devaskar SU. Fetal Origins of Adult Disease. Current Problems in Pediatric and Adolescent Health Care 2011;41(6):158-176.	E	TA												X
592	Callewaert BL, Loeys BL, Ficcadenti A, Vermeer S, Landgren M, Kroes HY, et al. Comprehensive Clinical and Molecular Assessment of 32 Probands With Congenital Contractural Arachnodactyly: Report of 14 Novel Mutations and Review of the Literature. Human Mutation 2009;30(3):334-341.	E	TA												X
593	Camelo LV, Giatti L, Barbosa Neves JA, Lotufo PA, Bensenor IM, Chor D, et al. Life Course Socioeconomic Position and C-Reactive Protein: Mediating Role of Health-Risk Behaviors and Metabolic Alterations. The Brazilian Longitudinal Study of Adult Health (ELSA-Brasil). Plos One 2014;9(10).	E	TA												X
594	Cameron AJ, Zimmet PZ. What will it take to curb the rise in obesity? Medical Journal of Australia 2014;201(1):25-26.	E	TA	X											X
595	Camhi SM, Katzmarzyk PT. Tracking of cardiometabolic risk factor clustering from childhood to adulthood. International Journal of Pediatric Obesity 2010;5(2):122-129.	E	F	Sys-Review
596	Camhi SM, Katzmarzyk PT. Differences in body composition between metabolically healthy obese and metabolically abnormal obese adults. International Journal of Obesity 2014;38(8):1142-1145.	E	TA		X
597	Campbell CP, Barnett AT, Boyne MS, Soares-Wynter S, Osmond C, Fraser RA, et al. Predictors of physical activity energy expenditure in Afro-Caribbean children. Eur J Clin Nutr 2010;64(10):1093-100.	E	TA												X
598	Campbell S, Lynch J, Esterman A, McDermott R. Pre-pregnancy predictors linked to miscarriage among Aboriginal and Torres Strait Islander women in North Queensland. Aust N Z J Public Health 2011;35(4):343-51.	E	TA												X
599	Campbell SK, Lynch J, Esterman A, McDermott R. Pre-pregnancy predictors of diabetes in pregnancy among Aboriginal and Torres Strait Islander women in North Queensland, Australia. Matern Child Health J 2012;16(6):1284-92.	E	TA												X
600	Campbell SK, Lynch J, Esterman A, McDermott R. Pre-pregnancy predictors of hypertension in pregnancy among Aboriginal and Torres Strait Islander women in north Queensland, Australia; a prospective cohort study. BMC Public Health 2013;13:138.	E	TA												X
601	Campbell TS, Ditto B, Seguin JR, Assaad JM, Pihl RO, Nagin D, et al. A longitudinal study of pain sensitivity and blood pressure in adolescent boys: results from a 5-year follow-up. Health Psychol 2002;21(6):594-600.	E	TA												X
602	Campbell TS, Séguin JR, Vitaro F, Tremblay RE, Ditto B. Childhood socioeconomic position and blood pressure dipping in early adulthood: A longitudinal study. Annals of Behavioral Medicine 2013;46(2):227-231.	E	F												X
603	Campillo B, Bories PN, Pornin B, Devanlay M. Influence of liver failure, ascites, and energy expenditure on the response to oral nutrition in alcoholic liver cirrhosis. Nutrition 1997;13(7-8):613-21.	E	TA												X
604	Campitelli MA, Rosella LC, Kwong JC. The association between obesity and outpatient visits for acute respiratory infections in Ontario, Canada. International Journal of Obesity 2014;38(1):113-119.	E	TA												X
605	Candela S, Pergolizzi S, Ragni P, Cavuto S, Nobilio L, Di Mario S, et al. An early (3-6 weeks) active surveillance study to assess the safety of pandemic influenza vaccine Focetria® in a province of Emilia-Romagna region, Italy - Part One. Vaccine 2013;31(10):1431-1437.	E	TA												X
606	Candido AP, Ferreira S, Lima AA, de Carvalho Nicolato RL, de Freitas SN, Brandao P, et al. Lipoprotein(a) as a risk factor associated with ischemic heart disease: Ouro Preto Study. Atherosclerosis 2007;191(2):454-9.	E	TA												X
607	Canning KL, Brown RE, Jamnik VK, Kuk JL. Relationship between obesity and obesity-related morbidities weakens with aging. J Gerontol A Biol Sci Med Sci 2014;69(1):87-92.	E	TA		X										X
608	Cannon GW, Holden WL, Juhaeri J, Dai WJ, Scarazzini L, Stang P. Adverse events with disease modifying antirheumatic drugs (DMARD): A cohort study of leflunomide compared with other DMARD. Journal of Rheumatology 2004;31(10):1906-1911.	E	TA												X
609	Canoy D, Barber TM, Pouta A, Hartikainen AL, McCarthy MI, Franks S, et al. Serum sex hormone-binding globulin and testosterone in relation to cardiovascular disease risk factors in young men: a population-based study. Eur J Endocrinol 2014;170(6):863-72.	E	TA												X
610	Canoy D, Beral V, Balkwill A, Wright FL, Kroll ME, Reeves GK, et al. Age at menarche and risks of coronary heart and other vascular diseases in a large UK cohort. Circulation 2015;131(3):237-244.	E	TA												X
611	Canoy D, Pouta A, Ruokonen A, Hartikainen A-L, Saikku P, Jarvelin M-R. Weight at Birth and Infancy in Relation to Adult Leukocyte Count: A Population-Based Study of 5619 Men and Women Followed from the Fetal Period to Adulthood. Journal of Clinical Endocrinology & Metabolism 2009;94(6):1916-1922.	E	TA												X
612	Canpolat U, Aytemir K, Yorgun H, Şahiner L, Kaya EB, Oto A. A proposal for a new scoring system in the prediction of catheter ablation outcomes: Promising results from the Turkish Cryoablation Registry. International Journal of Cardiology 2013;169(3):201-206.	E	TA												X
613	Canuto K, Cargo M, Li M, D'Onise K, Esterman A, McDermott R. Pragmatic randomised trial of a 12-week exercise and nutrition program for Aboriginal and Torres Strait Islander women: clinical results immediate post and 3 months follow-up. BMC Public Health 2012;12:933.	E	TA												X
614	Capalbo D, Mattace Raso G, Esposito A, Di Mase R, Barbieri F, Meli R, et al. Cluster of cardiometabolic risk factors in children with GH deficiency: a prospective, case-control study. Clin Endocrinol (Oxf) 2014;80(6):856-62.	E	TA												X
615	Caprio S, Bronson M, Sherwin RS, Rife F, Tamborlane WV. Co-existence of severe insulin resistance and hyperinsulinaemia in pre-adolescent obese children. Diabetologia 1996;39(12):1489-97.	E	TA												X
616	Capristo E, Addolorato G, Mingrone G, De Gaetano A, Greco AV, Tataranni PA, et al. Changes in body composition, substrate oxidation, and resting metabolic rate in adult celiac disease patients after a 1-y gluten-free diet treatment. Am J Clin Nutr 2000;72(1):76-81.	E	TA												X
617	Carbayo Herencia JA, Simarro Rueda M, Artigao Rodenas LM, Divison Garrote JA, Caldevilla Bernardo D, Ponce Garcia I, et al. [Relationship between inflammation marker and all-cause and cardiovascular mortality in a prospective cohort study]. Clin Investig Arterioscler 2013;25(2):56-62.	E	TA												X
618	Carboni N, Mura M, Marrosu G, Cocco E, Marini S, Solla E, et al. Muscle Imaging Analogies in a Cohort of Patients with Different Clinical Phenotypes Caused by Lmna Gene Mutations. Muscle & Nerve 2010;41(4):458-463.	E	TA												X
619	Carbonnel F, Beaugerie L, Abou Rached A, D'Almagne H, Rozenbaum W, Le Quintrec Y, et al. Macronutrient intake and malabsorption in HIV infection: a comparison with other malabsorptive states. Gut 1997;41(6):805-10.	E	TA												X
620	Cardellini M, Andreozzi F, Laratta E, Marini MA, Lauro R, Hribal ML, et al. Plasma interleukin-6 levels are increased in subjects with impaired glucose tolerance but not in those with impaired fasting glucose in a cohort of Italian Caucasians. Diabetes/Metabolism Research and Reviews 2007;23(2):141-145.	E	TA												X
621	Cardomone Cusatis D, Chinchilli VM, Johnson-Rollings N, Kieselhorst K, Stallings VA, Lloyd T. Longitudinal nutrient intake patterns of U.S. adolescent women: The Penn State Young Women's Health Study. Journal of Adolescent Health 2000;26(7):194-204.	E	TA												X
622	Cardoso VC, Meritano J, Moura da Silva AA, Bettiol H, Barbieri MA, Grandi C. Size at birth and blood pressure in young adults: findings from a Brazilian birth cohort study. Revista De Saude Publica 2012;46(6):978-987.	E	F												X
623	Cardous-Ubbink MC, Geenen MM, Schade KJ, Heinen RC, Caron HN, Kremer LC, et al. Hypertension in long-term survivors of childhood cancer: a nested case-control study. Eur J Cancer 2010;46(4):782-90.	E	TA												X
624	Carel J-C, Ecosse E, Landier F, Meguellati-Hakkas D, Kaguelidou F, Rey G, et al. Long-Term Mortality after Recombinant Growth Hormone Treatment for Isolated Growth Hormone Deficiency or Childhood Short Stature: Preliminary Report of the French SAGhE Study. Journal of Clinical Endocrinology & Metabolism 2012;97(2):416-425.	E	TA												X
625	Carleton RA, Lasater TM, Assaf AR, Feldman HA, McKinlay S. The Pawtucket Heart Health Program: community changes in cardiovascular risk factors and projected disease risk. Am J Public Health 1995;85(6):777-85.	E	TA		X										X
626	Carlos Candido AP, Ferreira S, Lima AA, de Carvalho Nicolato RL, de Freitas SN, Brandao P, et al. Lipoprotein(a) as a risk factor associated with ischemic heart disease: Ouro Preto Study. Atherosclerosis 2007;191(2):454-459.	E	TA												X
627	Carlos Jaime-Perez J, Reyes-Escobedo A, Martinez-De La Garza KS, Luis Herrera-Garza J, Cantu-Rodriguez OG, Gutierrez-Aguirre H, et al. Chemotherapy Alone or HSCT After Reduced-Intensity Conditioning for Patients with Malignant Hematologic Diseases Are Not Associated to Metabolic Syndrome: A Cross-Sectional Observational Study. Nutrition and Cancer-an International Journal 2014;66(6):924-929.	E	TA												X
628	Carluccio A, Sundaram NK, Chablani S, Amrock LG, Lambert JK, Post KD, et al. Predictors of quality of life in 102 patients with treated Cushing's disease. Clinical Endocrinology 2015;82(3):404-411.	E	TA												X
629	Carmona M, Garcia-Olmos LM, Alberquilla A, Munoz A, Garcia-Sagredo P, Somolinos R, et al. Heart failure in the family practice: a study of the prevalence and co-morbidity. Fam Pract 2011;28(2):128-33.	E	TA												X
630	Carnethon MR, Gulati M, Greenland P. Prevalence and cardiovascular disease correlates of low cardiorespiratory fitness in adolescents and adults. JAMA 2005;294(23):2981-8.	E	TA												X
631	Carnethon MR, Jacobs DR, Sidney S, Sternfeld B, Gidding SS, Shoushtari C, et al. A longitudinal study of physical activity and heart rate recovery: CARDIA, 1987-1993. Medicine and Science in Sports and Exercise 2005;37(4):606-612.	E	TA												X
632	Carney CP, Jones LE. Medical comorbidity in women and men with bipolar disorders: a population-based controlled study. Psychosom Med 2006;68(5):684-91.	E	TA												X
633	Carpenter MW. Gestational diabetes, pregnancy hypertension, and late vascular disease. Diabetes Care 2007;30 Suppl 2:S246-50.	E	TA												X
634	Carr EJ, Clatworthy MR, Lowe CE, Todd JA, Wong A, Vyse TJ, et al. Contrasting genetic association of IL2RA with SLE and ANCA - associated vasculitis. Bmc Medical Genetics 2009;10.	E	TA												X
635	Carrasco F, Papapietro K, Csendes A, Salazar G, Echenique C, Lisboa C, et al. Changes in resting energy expenditure and body composition after weight loss following Roux-en-Y gastric bypass. Obes Surg 2007;17(5):608-16.	E	TA												X
636	Carrel AL, Myers SE, Whitman BY, Allen DB. Benefits of long-term GH therapy in Prader-Willi syndrome: a 4-year study. J Clin Endocrinol Metab 2002;87(4):1581-5.	E	TA												X
637	Carrel AL, Sledge JS, Ventura SJ, Clark RR, Peterson SE, Eickhoff JC, et al. Measuring aerobic cycling power as an assessment of childhood fitness. J Strength Cond Res 2008;22(1):192-5.	E	TA												X
638	Carroll D, Phillips AC, Der G. Body mass index, abdominal adiposity, obesity, and cardiovascular reactions to psychological stress in a large community sample. Psychosom Med 2008;70(6):653-60.	E	TA												X
639	Carvalho Rondo PH, Lemos JO, Pereira JA, Pacheco Souza JM. The relationship between cortisol concentrations in pregnancy and systemic vascular resistance in childhood. Early Human Development 2010;86(2):127-131.	E	TA												X
640	Casagranda L, Trombert-Paviot B, Faure-Conter C, Bertrand Y, Plantaz D, Berger C. Self-reported and record-collected late effects in long-term survivors of childhood cancer: A population-based cohort study of the childhood cancer registry of the rhône-alpes region (ARCERRA). Pediatric Hematology and Oncology 2013;30(3):195-207.	E	TA												X
641	Casazza K, Dulin-Keita A, Gower BA, Fernandez JR. Differential influence of diet and physical activity on components of metabolic syndrome in a multiethnic sample of children. J Am Diet Assoc 2009;109(2):236-44.	E	TA												X
642	Casey PH. Growth of low birth weight preterm children. Semin Perinatol 2008;32(1):20-7.	E	TA												X
643	Casiglia E, Tikhonoff V, Caffi S, Bascelli A, Schiavon L, Guidotti F, et al. Menopause does not affect blood pressure and risk profile, and menopausal women do not become similar to men. J Hypertens 2008;26(10):1983-92.	E	TA												X
644	Caspi A, Harrington H, Moffitt TE, Milne BJ, Poulton R. Socially isolated children 20 years later - Risk of cardiovascular disease. Archives of Pediatrics & Adolescent Medicine 2006;160(8):805-811.	E	TA												X
645	Castillo EH, Borges G, Talavera JO, Orozco R, Vargas-Alemán C, Huitrón-Bravo G, et al. Body Mass Index and the Prevalence of Metabolic Syndrome among Children and Adolescents in Two Mexican Populations. Journal of Adolescent Health 2007;40(6):521-526.	E	TA												X
646	Castori M, Dordoni C, Valiante M, Sperduti I, Ritelli M, Morlino S, et al. Nosology and Inheritance Pattern(s) of Joint Hypermobility Syndrome and Ehlers-Danlos Syndrome, Hypermobility Type: A Study of Intrafamilial and Interfamilial Variability in 23 Italian Pedigrees. American Journal of Medical Genetics Part A 2014;164A(12):3010-3020.	E	TA												X
647	Castorina R, Bradman A, Sjodin A, Fenster L, Jones RS, Harley KG, et al. Determinants of serum polybrominated diphenyl ether (PBDE) levels among pregnant women in the CHAMACOS cohort. Environ Sci Technol 2011;45(15):6553-60.	E	TA												X
648	Cataland SR, Holers VM, Geyer S, Yang S, Wu HM. Biomarkers of terminal complement activation confirm the diagnosis of aHUS and differentiate aHUS from TTP. Blood 2014;123(24):3733-3738.	E	TA												X
649	Catov JM, Lewis CE, Lee M, Wellons MF, Gunderson EP. Preterm birth and future maternal blood pressure, inflammation, and intimal-medial thickness: the CARDIA study. Hypertension 2013;61(3):641-6.	E	TA												X
650	Catov JM, Ness RB, Kip KE, Olsen J. Risk of early or severe pre-eclampsia related to pre-existing conditions. Int J Epidemiol 2007;36(2):412-9.	E	TA												X
651	Cave M, Appana S, Patel M, Falkner KC, McClain CJ, Brock G. Polychlorinated biphenyls, lead, and mercury are associated with liver disease in American adults: NHANES 2003-2004. Environ Health Perspect 2010;118(12):1735-42.	E	TA												X
652	Caviezel S, Dratva J, Schaffner E, Schindler C, Stutz EZ, de Groot E, et al. Sex-specific associations of cardiovascular risk factors with carotid stiffness - Results from the SAPALDIA Cohort Study. Atherosclerosis 2014;235(2):576-584.	E	TA												X
653	Cederholm J, Eeg-Olofsson K, Eliasson B, Zethelius B, Nilsson PM, Gudbjornsdottir S. Risk prediction of cardiovascular disease in type 2 diabetes: a risk equation from the Swedish National Diabetes Register. Diabetes Care 2008;31(10):2038-43.	E	TA												X
654	Cederholm M, Haglund B, Axelsson O. Maternal complications following amniocentesis and chorionic villus sampling for prenatal karyotyping. BJOG 2003;110(4):392-9.	E	TA												X
655	Cedillo M, Libman IM, Arena VC, Zhou L, Trucco M, Ize-Ludlow D, et al. Obesity, islet cell autoimmunity, and cardiovascular risk factors in youth at onset of type 1 autoimmune diabetes. Journal of Clinical Endocrinology and Metabolism 2015;100(1):E82-E86.	E	TA												X
656	Cervera R, Boffa MC, Khamashta MA, Hughes GRV. The Euro-Phospholipid project: epidemiology of the antiphospholipid syndrome in Europe. Lupus 2009;18(10):889-893.	E	TA												X
657	Cervera R, Doria A, Amoura Z, Khamashta M, Schneider M, Guillemin F, et al. Patterns of systemic lupus erythematosus expression in Europe. Autoimmunity Reviews 2014;13(6):621-629.	E	TA												X
658	Cervera R, Khamashta MA, Font J, Sebastiani GD, Gil A, Lavilla P, et al. Morbidity and mortality in systemic lupus erythematosus during a 10-year period - A comparison of early and late manifestations in a cohort of 1,000 patients. Medicine 2003;82(5):299-308.	E	TA												X
659	Cesana F, Nava S, Menni C, Boffi L, Varrenti M, Meani P, et al. Does the 9p region affect arterial stiffness? Results from a cohort of hypertensive individuals. Blood Press 2013;22(5):302-6.	E	TA												X
660	Cespedes J, Briceno G, Farkouh ME, Vedanthan R, Baxter J, Leal M, et al. Targeting preschool children to promote cardiovascular health: cluster randomized trial. Am J Med 2013;126(1):27-35 e3.	E	TA												X
661	Cha SW, Choi SM, Kim KS, Park BL, Kim JR, Kim JY, et al. Replication of genetic effects of FTO polymorphisms on BMI in a Korean population. Obesity (Silver Spring) 2008;16(9):2187-9.	E	TA												X
662	Chabbert-Buffet N, Amoura Z, Scarabin P-Y, Frances C, Levy DP, Galicier L, et al. Pregnane progestin contraception in systemic lupus erythematosus: a longitudinal study of 187 patients. Contraception 2011;83(3):229-237.	E	TA												X
663	Chadha DS, Gupta N, Goel K, Pandey RM, Kondal D, Ganjoo RK, et al. Impact of Obesity on the Left Ventricular Functions and Morphology of Healthy Asian Indians. Metabolic Syndrome and Related Disorders 2009;7(2):151-158.	E	TA												X
664	Chaix B, Jouven X, Thomas F, Leal C, Billaudeau N, Bean K, et al. Why socially deprived populations have a faster resting heart rate: impact of behaviour, life course anthropometry, and biology--the RECORD Cohort Study. Soc Sci Med 2011;73(10):1543-50.	E	TA												X
665	Champagne KA, John Kimoff R, Barriga PC, Schwartzman K. Sleep disordered breathing in women of childbearing age & during pregnancy. Indian Journal of Medical Research 2010;131(2):285-301.	E	TA												X
666	Chan DFY, Li AM, Chu WCW, Chan MHM, Wong EMC, Liu EKH, et al. Hepatic steatosis in obese Chinese children. International Journal of Obesity 2004;28(10):1257-1263.	E	TA												X
667	Chan JCN, So W, Ko G, Tong P, Yang X, Ma R, et al. The joint asia diabetes evaluation (JADE) program: A web-based program to translate evidence to clinical practice in type 2 diabetes. Diabetic Medicine 2009;26(7):693-699.	E	TA												X
668	Chan WB, Chan JC, Chow CC, Yeung VT, So WY, Li JK, et al. Glycaemic control in type 2 diabetes: the impact of body weight, beta-cell function and patient education. QJM 2000;93(3):183-90.	E	TA												X
669	Chan WB, Tong PCY, Chow CC, So WY, Ng MCY, Ma RCW, et al. The associations of body mass index, C-peptide and metabolic status in Chinese Type 2 diabetic patients. Diabetic Medicine 2004;21(4):349-353.	E	TA		X										X
670	Chandra A, Aragon-Martin JA, Hughes K, Gati S, Reddy MA, Deshpande C, et al. A Genotype-Phenotype Comparison of ADAMTSL4 and FBN1 in Isolated Ectopia Lentis. Investigative Ophthalmology & Visual Science 2012;53(8):4889-4896.	E	TA												X
671	Chandra V, Little C, Lee JT. Thoracic outlet syndrome in high-performance athletes. Journal of Vascular Surgery 2014;60(4):1012-1017.	E	TA												X
672	Chang A, Van Horn L, Jacobs DR, Jr., Liu K, Muntner P, Newsome B, et al. Lifestyle-related factors, obesity, and incident microalbuminuria: the CARDIA (Coronary Artery Risk Development in Young Adults) study. Am J Kidney Dis 2013;62(2):267-75.	E	TA												X
673	Chang CJ, Wu CH, Lu FH, Wu JS, Chiu NT, Yao WJ. Discriminating glucose tolerance status by regions of interest of dual-energy X-ray absorptiometry. Clinical implications of body fat distribution. Diabetes Care 1999;22(12):1938-43.	E	TA												X
674	Chang EI, Vaca L, Dalio AL, Festekjian JH, Crisera CA. Assessment of advanced age as a risk factor in microvascular breast reconstruction. Annals of Plastic Surgery 2011;67(3):255-259.	E	TA												X
675	Chang HS, Odongua N, Ohrr H, Sull JW, Nam CM. Reproductive risk factors for cardiovascular disease mortality among postmenopausal women in Korea: The Kangwha Cohort Study, 1985-2005. Menopause 2011;18(11):1205-1212.	E	TA												X
676	Chang IH, Han JH, Myung SC, Kwak KW, Kim TH, Park SW, et al. Association between metabolic syndrome and chronic kidney disease in the Korean population. Nephrology 2009;14(3):321-326.	E	TA												X
677	Chang SC, O'Brien KO, Nathanson MS, Mancini J, Witter FR. Hemoglobin concentrations influence birth outcomes in pregnant African-American adolescents. Journal of Nutrition 2003;133(7):2348-2355.	E	TA												X
678	Chang-Claude J, Frentzel-Beyme R. Dietary and lifestyle determinants of mortality among German vegetarians. Int J Epidemiol 1993;22(2):228-36.	E	TA												X
679	Chaouachi A, Coutts AJ, Chamari K, Wong P, Chaouachi M, Chtara M, et al. Effect of Ramadan intermittent fasting on aerobic and anaerobic performance and perception of fatigue in male elite judo athletes. Journal of strength and conditioning research / National Strength & Conditioning Association 2009;23(9):2702-2709.	E	TA												X
680	Chaouat A, Canuet M, Kraemer JP, Enache I, Ducolone A, Kessler R, et al. [Physiological functional tests to evaluate pulmonary arterial hypertension]. Rev Mal Respir 2005;22(6 Pt 1):991-7.	E	TA												X
681	Chaput J-P, Sjodin AM, Astrup A, Despres J-P, Bouchard C, Tremblay A. Risk Factors for Adult Overweight and Obesity: The Importance of Looking Beyond the 'Big Two'. Obesity Facts 2010;3(5):320-327.	E	F												X	baseline adult population 18-64 followed longit
682	Chaput JP, Bouchard C, Tremblay A. Change in sleep duration and visceral fat accumulation over 6 years in adults. Obesity 2014;22(5):E9-E12.	E	TA												X
683	Chaput JP, Leblanc C, Perusse L, Despres JP, Bouchard C, Tremblay A. Risk factors for adult overweight and obesity in the Quebec Family Study: have we been barking up the wrong tree? Obesity (Silver Spring) 2009;17(10):1964-70.	E	F												X	baseline adult population 18-64 followed longit
684	Chaput JP, McNeil J, Despres JP, Bouchard C, Tremblay A. Short sleep duration as a risk factor for the development of the metabolic syndrome in adults. Prev Med 2013;57(6):872-7.	E	F												X	baseline adult population 18-64 followed longit
685	Chaput JP, Visby T, Nyby S, Klingenberg L, Gregersen NT, Tremblay A, et al. Video game playing increases food intake in adolescents: A randomized crossover study. American Journal of Clinical Nutrition 2011;93(6):1196-1203.	E	TA												X
686	Charakida M, Khan T, Johnson W, Finer N, Woodside J, Whincup PH, et al. Lifelong patterns of BMI and cardiovascular phenotype in individuals aged 60-64 years in the 1946 British birth cohort study: An epidemiological study. The Lancet Diabetes and Endocrinology 2014;2(8):648-654.	E	F													Emailed author for data
687	Charchar FJ, Tomaszewski M, Lacka B, Zakrzewski J, Zukowska-Szczechowska E, Grzeszczak W, et al. Association of the human Y chromosome with cholesterol levels in the general population. Arteriosclerosis Thrombosis and Vascular Biology 2004;24(2):308-312.	E	TA												X
688	Charles MA. "Longitudinal changes in risk variables of insulin resistance syndrome from childhood to young adulthood in offspring of parents with type 2 diabetes: The Bogalusa Heart Study" by Srinivasan et al. Metabolism: Clinical and Experimental 2003;52(4):451-453.	E	TA												X
689	Charpak N, Ruiz JG. Breast milk composition in a cohort of pre-term infants' mothers followed in an ambulatory programme in Colombia. Acta Paediatrica, International Journal of Paediatrics 2007;96(12):1755-1759.	E	TA												X
690	Chateau-Degat M-L, Dewailly E, Charbonneau G, Laouan-Sidi EA, Tremblay A, Egeland GM. Obesity risks: towards an emerging Inuit pattern. International Journal of Circumpolar Health 2011;70(2):166-177.	E	TA												X
691	Chateau-Degat ML, Ferland A, Déry S, Dewailly É. Dietary sodium intake deleteriously affects blood pressure in a normotensive population. European Journal of Clinical Nutrition 2012;66(4):533-535.	E	TA												X
692	Chaturvedi N, Bandinelli S, Mangili R, Penno G, Rottiers RE, Fuller JH. Microalbuminuria in type 1 diabetes: rates, risk factors and glycemic threshold. Kidney Int 2001;60(1):219-27.	E	TA												X
693	Chaudhari S, Otiv M, Khairnar B, Pandit A, Hoge M, Sayyad M. Pune low birth weight study, growth from birth to adulthood. Indian Pediatr 2012;49(9):727-32.	E	TA												X	followed up till the age of 18 years
694	Chavarro JE, Minguez-Alarcon L, Mendiola J, Cutillas-Tolin A, Lopez-Espin JJ, Torres-Cantero AM. Trans fatty acid intake is inversely related to total sperm count in young healthy men. Hum Reprod 2014;29(3):429-40.	E	TA												X
695	Chawla A, Sprinz PG, Welch J, Heeney M, Usmani N, Pashankar F, et al. Weight status of children with sickle cell disease. Pediatrics 2013;131(4):e1168-e1173.	E	TA												X
696	Checkley W, West KP, Jr., Wise RA, Baldwin MR, Wu L, LeClerq SC, et al. Maternal Vitamin A Supplementation and Lung Function in Offspring. New England Journal of Medicine 2010;362(19):1784-1794.	E	TA												X
697	Chemaitilly W, Li Z, Huang S, Ness KK, Clark KL, Green DM, et al. Anterior Hypopituitarism in Adult Survivors of Childhood Cancers Treated With Cranial Radiotherapy: A Report From the St Jude Lifetime Cohort Study. Journal of Clinical Oncology 2015;33(5):492-U160.	E	TA												X
698	Chen CJ, Chiou HY, Chiang MH, Lin LJ, Tai TY. Dose-response relationship between ischemic heart disease mortality and long-term arsenic exposure. Arterioscler Thromb Vasc Biol 1996;16(4):504-10.	E	TA												X
699	Chen H-M, Lin C-C, Kang C-S, Lee C-T, Lin H-C, Chung S-D. Bladder pain syndrome/interstitial cystitis increase the risk of coronary heart disease. Neurourology and Urodynamics 2014;33(5):511-515.	E	TA												X
700	Chen J, Millar WJ. Health effects of physical activity. Health Rep 1999;11(1):21-30(Eng); 21-31(Fre).	E	TA												X
701	Chen LF, Chen HP, Huang YS, Huang KY, Chou P, Lee CC. Pneumococcal Pneumonia and the Risk of Stroke: A Population-Based Follow-Up Study. PLoS ONE 2012;7(12).	E	TA												X
702	Chen M-H, Chen M-H, Chen W-S, Chang PM-H, Lee H-T, Lin H-Y, et al. Thrombotic microangiopathy in systemic lupus erythematosus: a cohort study in North Taiwan. Rheumatology 2011;50(4):768-775.	E	TA												X
703	Chen N-H, Chuang L-P, Yang C-T, Kushida CA, Hsu S-C, Wang P-C, et al. The prevalence of restless legs syndrome in Taiwanese adults. Psychiatry and Clinical Neurosciences 2010;64(2):170-178.	E	TA												X
704	Chen R, Song Y, Hu Z, Brunner EJ. Predictors of diabetes in older people in urban China. PLoS One 2012;7(11):e50957.	E	TA												X
705	Chen S, Wu N, Fraser K, Boulanger L, Zhao Y. Opioid use and healthcare costs among patients with DPNP initiating duloxetine versus other treatments. Current Medical Research and Opinion 2010;26(10):2507-2516.	E	TA												X
706	Chen SY, Chen SM, Chang WH, Lai CH, Chen MC, Chou CH, et al. Effect of 2-month detraining on body composition and insulin sensitivity in young female dancers. Int J Obes (Lond) 2006;30(1):40-4.	E	TA												X
707	Chen W, Li S, Cook NR, Rosner BA, Srinivasan SR, Boerwinkle E, et al. An autosomal genome scan for loci influencing longitudinal burden of body mass index from childhood to young adulthood in white sibships: The Bogalusa Heart Study. Int J Obes Relat Metab Disord 2004;28(4):462-9.	E	TA												X
708	Chen W, Li S, Srinivasan SR, Boerwinkle E, Berenson GS. A genorne scan for loci influencing levels and trends of lipoprotein lipid-related traits since childhood: The Bogalusa Heart Study. Atherosclerosis 2007;190(2):248-255.	E	TA												X
709	Chen W, Li SX, Srinivasan SR, Boerwinkle E, Berenson GS. Autosomal genome scan for loci linked to blood pressure levels and trends since childhood - The Bogalusa Heart Study. Hypertension 2005;45(5):954-959.	E	TA												X
710	Chen W, Srinivasan SR, Bao W, Berenson GS. The magnitude of familial associations of cardiovascular risk factor variables between parents and offspring are influenced by age: the Bogalusa Heart Study. Ann Epidemiol 2001;11(8):522-8.	E	TA												X
711	Chen W, Srinivasan SR, Berenson GS. Amplification of the association between birthweight and blood pressure with age: the Bogalusa Heart Study. J Hypertens 2010;28(10):2046-52.	E	F												X
712	Chen W, Srinivasan SR, Boerwinkle E, Berenson GS. Hepatic lipase promoter C-514T polymorphism influences serial changes in HDL cholesterol levels since childhood: the Bogalusa Heart Study. Atherosclerosis 2003;169(1):175-82.	E	TA												X
713	Chen W, Srinivasan SR, Hallman DM, Berenson GS. The relationship between birthweight and longitudinal changes of blood pressure is modulated by beta-adrenergic receptor genes: the Bogalusa Heart Study. J Biomed Biotechnol 2010;2010:543514.	E	TA												X
714	Chen W, Srinivasan SR, Li S, Boerwinkle E, Berenson GS. Gender-specific influence of NO synthase gene on blood pressure since childhood: the Bogalusa Heart Study. Hypertension 2004;44(5):668-73.	E	TA												X
715	Chen W, Srinivasan SR, Li S, Xu J, Berenson GS. Metabolic syndrome variables at low levels in childhood are beneficially associated with adulthood cardiovascular risk: the Bogalusa Heart Study. Diabetes Care 2005;28(1):126-31.	E	TA												X
716	Chen W, Srinivasan SR, Li S, Xu J, Berenson GS. Clustering of long-term trends in metabolic syndrome variables from childhood to adulthood in Blacks and Whites: the Bogalusa Heart Study. Am J Epidemiol 2007;166(5):527-33.	E	F												X	Outcome: Mean arterial pressure and triglyceride:HDLC ratio
717	Chen W, Srinivasan SR, Ruan L, Mei H, Berenson GS. Adult hypertension is associated with blood pressure variability in childhood in blacks and whites: the bogalusa heart study. Am J Hypertens 2011;24(1):77-82.	E	F													Another study by BHS included
718	Chen W, Srinivasan SR, Xu J, Berenson GS. Black-white divergence in the relation of white blood cell count to metabolic syndrome in preadolescents, adolescents, and young adults: the Bogalusa Heart Study. Diabetes Care 2010;33(11):2474-6.	E	TA												X
719	Chen W, Yun M, Fernandez C, Li S, Sun D, Lai CC, et al. Secondhand smoke exposure is associated with increased carotid artery intima-media thickness: The Bogalusa Heart Study. Atherosclerosis 2015;240(2):374-379.	E	TA												X
720	Chen WJ, Liu PH, Ho YY, Chien KL, Lo MT, Shih WL, et al. Sibling recurrence risk ratio analysis of the metabolic syndrome and its components over time. BMC Genet 2003;4 Suppl 1:S33.	E	TA												X
721	Chen X-K, Lougheed J, Lawson ML, Gibb W, Walker RC, Wen SW, et al. Effects of repeated courses of antenatal corticosteroids on somatic development in children 6 to 10 years of age. American Journal of Perinatology 2008;25(1):21-28.	E	TA												X
722	Chen Y, Ahsan H, Parvez F, Howe GR. Validity of a food-frequency questionnaire for a large prospective cohort study in Bangladesh. British Journal of Nutrition 2004;92(5):851-859.	E	TA												X
723	Chen Y, Graziano JH, Parvez F, Liu M, Slavkovich V, Kalra T, et al. Arsenic exposure from drinking water and mortality from cardiovascular disease in Bangladesh: prospective cohort study. BMJ 2011;342:d2431.	E	TA												X
724	Chen Y, Jiang X-y, Xu L, Li X, Cao F-f, Li L, et al. Association of ER-Alpha Gene Polymorphism with Metabolic Phenotypes in Chinese Hans. Lipids 2009;44(8):719-723.	E	TA												X
725	Chen Y, Lu J, Li LM, He PP, Yu CQ. [Effects of diet and physical activity factors on blood pressure in nine provinces of China: a longitudinal analysis]. Zhonghua Liu Xing Bing Xue Za Zhi 2010;31(5):500-5.	E	TA												X
726	Chen Y-P, Xiao X-M, Li J, Reichetzeder C, Wang Z-N, Hocher B. Paternal Body Mass Index (BMI) Is Associated with Offspring Intrauterine Growth in a Gender Dependent Manner. Plos One 2012;7(5).	E	TA												X
727	Chen Y-Y, Lee Y-S, Wang J-P, Jiang Y-Y, Li H, An Y-L, et al. Longitudinal Study of Childhood Adiposity and the Risk of Developing Components of Metabolic Syndrome-The Da Qing Children Cohort Study. Pediatric Research 2011;70(3):307-312.	E	F												X	FU time 5 to 10 years
728	Cheng P, Neugaard B, Foulis P, Conlin PR. Hemoglobin A1c as a predictor of incident diabetes. Diabetes Care 2011;34(3):610-5.	E	TA												X
729	Cheng R, Park N, Hodge SE, Juo SH. Comparison of the linkage results of two phenotypic constructs from longitudinal data in the Framingham Heart Study: analyses on data measured at three time points and on the average of three measurements. BMC Genet 2003;4 Suppl 1:S20.	E	TA												X
730	Cheung LK, Lal LS, Chow DSL, Sherman V. Racial disparity in short-term outcomes after gastric bypass surgery. Obesity Surgery 2013;23(12):2096-2103.	E	TA												X
731	Cheung N, Rogers SL, Donaghue KC, Jenkins AJ, Tikellis G, Wong TY. Retinal arteriolar dilation predicts retinopathy in adolescents with type 1 diabetes. Diabetes Care 2008;31(9):1842-6.	E	TA												X
732	Cheung N, Saw SM, Islam FM, Rogers SL, Shankar A, de Haseth K, et al. BMI and retinal vascular caliber in children. Obesity (Silver Spring) 2007;15(1):209-15.	E	TA												X
733	Cheung N, Tikellis G, Saw SM, Amirul Islam FM, Mitchell P, Wang JJ, et al. Relationship of axial length and retinal vascular caliber in children. Am J Ophthalmol 2007;144(5):658-662.	E	TA												X
734	Cheung N, Tong L, Tikellis G, Saw SM, Mitchell P, Wang JJ, et al. Relationship of retinal vascular caliber with optic disc diameter in children. Invest Ophthalmol Vis Sci 2007;48(11):4945-8.	E	TA												X
735	Cheung YB, Machin D, Karlberg J, Khoo KS. A longitudinal study of pediatric body mass index values predicted health in middle age. J Clin Epidemiol 2004;57(12):1316-22.	E	TA												X	Outcome: obesity
736	Cheung YF. Arterial stiffness in children and teenagers: An emerging cardiovascular risk factor. Hong Kong Journal of Paediatrics 2005;10(4):299-306+314-315.	E	TA												X
737	Cheung YF, Ho MHK, Ip WK, Fok SFS, Yung TC, Lau YL. Modulating effects of mannose binding lectin genotype on arterial stiffness in children after Kawasaki disease. Pediatric Research 2004;56(4):591-596.	E	TA												X
738	Chidambaram V, Brewster PJ, Jordan KC, Hurdle JF. qDIET: toward an automated, self-sustaining knowledge base to facilitate linking point-of-sale grocery items to nutritional content. AMIA Annu Symp Proc 2013;2013:224-33.	E	TA												X
739	Chinali M, de Simone G, Roman MJ, Lee ET, Best LG, Howard BV, et al. Impact of obesity on cardiac geometry and function in a population of adolescents: the Strong Heart Study. J Am Coll Cardiol 2006;47(11):2267-73.	E	TA												X
740	Chiolero A, Paradis G, Lambert M. Accuracy of oscillometric devices in children and adults. Blood Pressure 2010;19(4):254-259.	E	TA												X
741	Chiowanich P, Mangklabruks A, Rerkasem A, Wongthanee A, Rerkasem K, Chiowanich P, et al. The risk factors of low birth weight infants in the Northern part of Thailand. Journal of the Medical Association of Thailand 2012;95(3):358-365.	E	TA												X
742	Chirico D, O'Leary D, Cairney J, Haluka K, Coverdale NS, Klentrou P, et al. Longitudinal assessment of left ventricular structure and function in adolescents with developmental coordination disorder. Res Dev Disabil 2012;33(2):717-25.	E	TA												X
743	Chiswick ML, Marcovitch H. Aging and paediatric practice. Archives of Disease in Childhood 1997;77(5):375-376.	E	TA												X
744	Chittleborough CR, Baldock KL, Phillips PJ, Taylor AW. Achievement of management targets associated with incident and long-term diagnosed diabetes among a representative population sample. Diabetes Res Clin Pract 2010;88(3):322-7.	E	TA												X
745	Chiu H-H, Wu M-H, Chen H-C, Kao F-Y, Huang S-K. Epidemiological Profile of Marfan Syndrome in a General Population: A National Database Study. Mayo Clinic Proceedings 2014;89(1):34-42.	E	TA												X
746	Cho B-S, Yahng S-A, Lee S-E, Eom K-S, Kim Y-J, Kim H-J, et al. Validation of Recently Proposed Consensus Criteria for Thrombotic Microangiopathy After Allogeneic Hematopoietic Stem-Cell Transplantation. Transplantation 2010;90(8):918-926.	E	TA												X
747	Cho HJ, Bower JE, Kiefe CI, Seeman TE, Irwin MR. Early life stress and inflammatory mechanisms of fatigue in the Coronary Artery Risk Development in Young Adults (CARDIA) study. Brain Behavior and Immunity 2012;26(6):859-865.	E	TA												X
748	Cho JH, Jae SY, Choo IH, Choo J. Health-promoting behaviour among women with abdominal obesity: A conceptual link to social support and perceived stress. Journal of Advanced Nursing 2014;70(6):1381-1390.	E	TA												X
749	Choh AC, Nahhas RW, Lee M, Choi YS, Chumlea WC, Duren DL, et al. Secular trends in blood pressure during early-to-middle adulthood: the Fels Longitudinal Study. J Hypertens 2011;29(5):838-45.	E	TA												X	Change of outcome overtime
750	Choi KM, Yannakoulia M, Park MS, Cho GJ, Kim JH, Lee SH, et al. Serum adipocyte fatty acid-binding protein, retinol-binding protein 4, and adiponectin concentrations in relation to the development of the metabolic syndrome in Korean boys: a 3-y prospective cohort study. Am J Clin Nutr 2011;93(1):19-26.	E	TA												X	Change of outcome overtime
751	Choi YS, Jang HB, Park JY, Lee HJ, Kang JH, Park KH, et al. Associations Between Estimated Desaturase Activity and Insulin Resistance in Korean Boys. Osong Public Health and Research Perspectives 2014;5(5):251-257.	E	TA												X
752	Chokshi N, Blumenschein SD, Ahmad Z, Garg A. Genotype-phenotype relationships in patients with type i hyperlipoproteinemia. Journal of Clinical Lipidology 2014;8(3):287-295.	E	TA												X
753	Choo J, Elci OU, Yang K, Turk MW, Styn MA, Sereika SM, et al. Longitudinal relationship between physical activity and cardiometabolic factors in overweight and obese adults. European Journal of Applied Physiology 2010;108(2):329-336.	E	TA												X
754	Choong E, Bondolfi G, Etter M, Jermann F, Aubry J-M, Bartolomei J, et al. Psychotropic drug-induced weight gain and other metabolic complications in a Swiss psychiatric population. Journal of Psychiatric Research 2012;46(4):540-548.	E	TA												X
755	Chopra I, Kamal KM. Factors associated with therapeutic goal attainment in patients with concomitant hypertension and dyslipidemia. Hospital practice (1995) 2014;42(2):77-88.	E	TA												X
756	Choquet H, Nelson J, Pawlikowska L, McCulloch CE, Akers A, Baca B, et al. Association of cardiovascular risk factors with disease severity in cerebral cavernous malformation type 1 subjects with the common Hispanic mutation. Cerebrovasc Dis 2014;37(1):57-63.	E	TA												X
757	Chou CH, Lin MC, Peng CL, Wu YC, Sung FC, Kao CH, et al. A nationwide population-based retrospective cohort study: increased risk of acute coronary syndrome in patients with ankylosing spondylitis. Scandinavian Journal of Rheumatology 2014;43(2):132-136.	E	TA												X
758	Chow EJ, Pihoker C, Hunt K, Wilkinson K, Friedman DL. Obesity and hypertension among children after treatment for acute lymphoblastic leukemia. Cancer 2007;110(10):2313-20.	E	TA												X
759	Chow EJ, Simmons JH, Roth CL, Baker KS, Hoffmeister PA, Sanders JE, et al. Increased cardiometabolic traits in pediatric survivors of acute lymphoblastic leukemia treated with total body irradiation. Biol Blood Marrow Transplant 2010;16(12):1674-81.	E	TA												X
760	Chow EJ, Wong K, Lee SJ, Cushing-Haugen KL, Flowers ME, Friedman DL, et al. Late cardiovascular complications after hematopoietic cell transplantation. Biol Blood Marrow Transplant 2014;20(6):794-800.	E	TA												X
761	Chowdhary VR, Crowson CS, Poterucha JJ, Moder KG. Liver Involvement in Systemic Lupus Erythematosus: Case Review of 40 Patients. Journal of Rheumatology 2008;35(11):2159-2164.	E	TA												X
762	Christen WG, Manson JE, Bubes V, Glynn RJ. Risk factors for progression of distal symmetric polyneuropathy in type 1 diabetes mellitus. Sorbinil Retinopathy Trial Research Group. Am J Epidemiol 1999;150(11):1142-51.	E	TA												X
763	Christensen R, Lorenzen JK, Svith CR, Bartels EM, Melanson EL, Saris WH, et al. Effect of calcium from dairy and dietary supplements on faecal fat excretion: a meta-analysis of randomized controlled trials. Obes Rev 2009;10(4):475-86.	E	TA												X
764	Christophers E. Psoriasis--epidemiology and clinical spectrum. Clin Exp Dermatol 2001;26(4):314-20.	E	TA												X
765	Chrysohoou C, Panagiotakos DB, Pitsavos C, Skoumas J, Krinos X, Chloptsios Y, et al. Long-term fish consumption is associated with protection against arrhythmia in healthy persons in a Mediterranean region--the ATTICA study. Am J Clin Nutr 2007;85(5):1385-91.	E	TA												X
766	Chrysohoou C, Pitsavos C, Skoumas J, Masoura C, Katinioti A, Panagiotakos D, et al. The emerging anti-inflammatory role of HDL-cholesterol, illustrated in cardiovascular disease free population; the ATTICA study. International Journal of Cardiology 2007;122(1):29-33.	E	TA												X
767	Chryssostalis A, Hubert D, Coste J, Kanaan R, Burgel P-R, Desmazes-Dufeu N, et al. Liver disease in adult patients with cystic fibrosis: A frequent and independent prognostic factor associated with death or lung transplantation. Journal of Hepatology 2011;55(6):1377-1382.	E	TA												X
768	Chu X, Erdman R, Susek M, Gerst H, Derr K, Al-Agha M, et al. Association of morbid obesity with FTO and INSIG2 allelic variants. Archives of Surgery 2008;143(3):235-240.	E	TA												X
769	Chuan F, Tang K, Jiang P, Zhou B, He X. Reliability and Validity of the Perfusion, Extent, Depth, Infection and Sensation (PEDIS) Classification System and Score in Patients with Diabetic Foot Ulcer. Plos One 2015;10(4).	E	TA												X
770	Chuang CH, Doyle P, Wang JD, Chang PJ, Lai JN, Chen PC. Herbal medicines used during the first trimester and major congenital malformations - An analysis of data from a pregnancy cohort study. Drug Safety 2006;29(6):537-548.	E	TA												X
771	Chuang LM, Tsai ST, Huang BY, Tai TY. The current state of diabetes management in Taiwan. Diabetes Res Clin Pract 2001;54 Suppl 1:S55-65.	E	TA												X
772	Chuhan R, Dahri GM, Murad S, Raza H, Akram S. Prevalence and incidence of diabetes mellitus in rural areas of sindh province of Pakistan. Pakistan Journal of Medical and Health Sciences 2010;4(3):263-265.	E	TA												X
773	Chung E, Yan H, De Young L, Brock GB. Penile Doppler sonographic and clinical characteristics in Peyronie's disease and/or erectile dysfunction: an analysis of 1500 men with male sexual dysfunction. Bju International 2012;110(8):1201-1205.	E	TA												X
774	Chung M, Ma J, Patel K, Berger S, Lau J, Lichtenstein AH. Fructose, high-fructose corn syrup, sucrose, and nonalcoholic fatty liver disease or indexes of liver health: a systematic review and meta-analysis. American Journal of Clinical Nutrition 2014;100(3):833-849.	E	TA												X
775	Chung RY, Schooling CM, Cowling BJ, Leung GM. How does socioeconomic development affect risk of mortality? An age-period-cohort analysis from a recently transitioned population in China. Am J Epidemiol 2010;171(3):345-56.	E	TA												X
776	Chung S-D, Lin C-C, Liu S-P, Lin H-C. Obstructive sleep apnea increases the risk of bladder pain syndrome/interstitial cystitis: A population-based matched-cohort study. Neurourology and Urodynamics 2014;33(3):278-282.	E	TA												X
777	Chung SA, Xie G, Roshandel D, Sherva R, Edberg JC, Kravitz M, et al. Meta-analysis of genetic polymorphisms in granulomatosis with polyangiitis (Wegener's) reveals shared susceptibility loci with rheumatoid arthritis. Arthritis and Rheumatism 2012;64(10):3463-3471.	E	TA												X
778	Chung SD, Lin CC, Liu SP, Lin HC. Obstructive sleep apnea increases the risk of bladder pain syndrome/interstitial cystitis: a population-based matched-cohort study. Neurourol Urodyn 2014;33(3):278-82.	Duplicate													Duplicate
779	Chung SD, Lin HC, Wang KH. Increased risk of pemphigoid following scabies: a population-based matched-cohort study. J Eur Acad Dermatol Venereol 2014;28(5):558-64.	E	TA												X
780	Chung WB, Hamburg NM, Holbrook M, Shenouda SM, Dohadwala MM, Terry DF, et al. The brachial artery remodels to maintain local shear stress despite the presence of cardiovascular risk factors. Arterioscler Thromb Vasc Biol 2009;29(4):606-12.	E	TA												X
781	Chyu L, McDade TW, Adam EK. Measured blood pressure and hypertension among young adults: a comparison between two nationally representative samples. Biodemography Soc Biol 2011;57(2):184-99.	E	TA												X
782	Ciacci C, Cirillo M, Giorgetti G, Alfinito F, Franchi A, Di Pietralata MM, et al. Low plasma cholesterol: A correlate of nondiagnosed celiac disease in adults with hypochromic anemia. American Journal of Gastroenterology 1999;94(7):1888-1891.	E	TA												X
783	Ciccacci C, Perricone C, Ceccarelli F, Rufini S, Di Fusco D, Alessandri C, et al. A Multilocus Genetic Study in a Cohort of Italian SLE Patients Confirms the Association with STAT4 Gene and Describes a New Association with HCP5 Gene. Plos One 2014;9(11).	E	TA												X
784	Ciccarelli O, Kaczmarek B, Roggen F, DeReyck C, Goffette P, Danse E, et al. Long-term medical complications and quality of life in adult recipients surviving 10 years or more after liver transplantation. Acta Gastro-Enterologica Belgica 2005;68(3):323-330.	E	TA												X
785	Cicero AF, D'Addato S, Reggi A, Marchesini G, Borghi C. Gender difference in hepatic steatosis index and lipid accumulation product ability to predict incident metabolic syndrome in the historical cohort of the Brisighella Heart Study. Metab Syndr Relat Disord 2013;11(6):412-6.	E	TA												X
786	Cicero AF, D'Addato S, Veronesi M, Rosticci M, Santi F, Dormi A, et al. Relationship between blood pressure, cholesterolemia and serum apolipoprotein B in a large population sample: the Brisighella Heart Study. J Hypertens 2012;30(3):492-6.	E	TA												X
787	Cicero AF, Dormi A, Nascetti S, Panourgia MP, Grandi E, D'Addato S, et al. Relative role of major risk factors for Type 2 diabetes development in the historical cohort of the Brisighella Heart Study: an 8-year follow-up. Diabet Med 2005;22(9):1263-6.	E	TA												X
788	Cicero AF, Reggi A, Tartagni E, Grandi E, D'Addato S, Borghi C. Dietary determinants of oxidized-low-density lipoprotein antibodies in a sample of pharmacologically untreated non-smoker subjects: data from the Brisighella heart study. Adv Clin Exp Med 2013;22(1):69-76.	E	TA												X
789	Cicero AFG, D'Addato S, Reggi A, Marchesini G, Borghi C. Gender difference in hepatic steatosis index and lipid accumulation product ability to predict incident metabolic syndrome in the historical cohort of the brisighella heart study. Metabolic Syndrome and Related Disorders 2013;11(6):412-416.	E	TA												X
790	Cicero AFG, Derosa G, Rosticci M, D'Addato S, Agnoletti D, Borghi C. Long-term predictors of impaired fasting glucose and type 2 diabetes in subjects with family history of type 2 diabetes: A 12-years follow-up of the Brisighella Heart Study historical cohort. Diabetes Research and Clinical Practice 2014;104(1):183-188.	E	TA												X
791	Cicero AFG, Magni P, Lentini P, Ruscica M, Dozio E, Strollo F, et al. Sex hormones and adipokines in healthy pre-menopausal, post-menopausal and elderly women, and in age-matched men: Data from the Brisighella Heart Study. Journal of Endocrinological Investigation 2011;34(7):E158-E162.	E	TA												X
792	Cicero AFG, Reggi A, Tartagni E, Grandi E, D'Addato S, Borghi C. Dietary determinants of oxidized-low-density lipoprotein antibodies in a sample of pharmacologically untreated non-smoker subjects: Data from the Brisighella heart study. Advances in Clinical and Experimental Medicine 2013;22(1):69-76.	E	TA												X
793	Cicero AFG, Rosticci M, Tocci G, Bacchelli S, Urso R, D'Addato S, et al. Serum uric acid and other short-term predictors of electrocardiographic alterations in the Brisighella Heart Study cohort. European Journal of Internal Medicine 2015;26(4):255-258.	E	TA												X
794	Cimaz R, Descloux E. Pediatric antiphospholipid syndrome. Rheumatic Disease Clinics of North America 2006;32(3):553-+.	E	TA												X
795	Cinar N, Gulcelik NE, Aydin K, Akin S, Usman A, Gurlek A. Serum vaspin levels in hypothyroid patients. Eur J Endocrinol 2011;165(4):563-9.	E	TA												X
796	Cinar N, Harmanci A, Bayraktar M, Yildiz BO. Ethinyl estradiol-drospirenone vs ethinyl estradiol-drospirenone plus metformin in the treatment of lean women with polycystic ovary syndrome. Clinical Endocrinology 2013;78(3):379-384.	E	TA												X
797	Cipkala-Gaffin J, Talbott EO, Song M-K, Bromberger J, Wilson J. Associations Between Psychologic Symptoms and Life Satisfaction in Women with Polycystic Ovary Syndrome. Journal of Womens Health 2012;21(2):179-187.	E	TA												X
798	Cirillo M, Stellato D, Lombardi C, De Santo NG, Covelli V. Headache and cardiovascular risk factors: positive association with hypertension. Headache 1999;39(6):409-16.	E	TA												X
799	Cisneros-Garza LE, Lopez-Hernandez PA, Munoz-Ramirez Mdel R, Castilla-Valdez MP, Sebastian-Ruiz MJ, Carmona-Martinez JG, et al. [Liver transplant at the UMAE 25 IMSS Monterrey]. Rev Invest Clin 2011;63 Suppl 1:67-72.	E	TA												X
800	Cizza G, Piaggi P, Lucassen EA, de Jonge L, Walter M, Mattingly MS, et al. Obstructive Sleep Apnea Is a Predictor of Abnormal Glucose Metabolism in Chronically Sleep Deprived Obese Adults. Plos One 2013;8(5).	E	TA												X
801	Claessen KM, Appelman-Dijkstra NM, Adoptie DM, Roelfsema F, Smit JW, Biermasz NR, et al. Metabolic profile in growth hormone-deficient (GHD) adults after long-term recombinant human growth hormone (rhGH) therapy. J Clin Endocrinol Metab 2013;98(1):352-61.	E	TA												X
802	Clark CJ, Alonso A, Spencer RA, Pencina M, Williams K, Everson-Rose SA. Predicted long-term cardiovascular risk among young adults in the national longitudinal study of adolescent health. Am J Public Health 2014;104(12):e108-15.	E	TA												X	average age: 28.9 years
803	Clark DA, Mosser EL, Foulds EL, Arnold EL, Wilson FH. Serum-Cholesterol Levels in Selected Air-Force Cadets Compared with Levels in the West-Point Study. Aviation Space and Environmental Medicine 1980;51(1):6-10.	E	TA												X
804	Clark EM, Ness AR, Tobias JH. Adipose tissue stimulates bone growth in prepubertal children. Journal of Clinical Endocrinology and Metabolism 2006;91(7):2534-2541.	E	TA												X
805	Clark MK, Dillon JS, Sowers M, Nichols S. Weight, fat mass, and central distribution of fat increase when women use depot-medroxyprogesterone acetate for contraception. International Journal of Obesity 2005;29(10):1252-1258.	E	TA												X
806	Clark ML, Bachand AM, Heiderscheidt JM, Yoder SA, Luna B, Volckens J, et al. Impact of a cleaner-burning cookstove intervention on blood pressure in Nicaraguan women. Indoor Air 2013;23(2):105-14.	E	TA												X
807	Clausen T, Burski TK, Oyen N, Godang K, Bollerslev J, Henriksen T. Maternal anthropometric and metabolic factors in the first half of pregnancy and risk of neonatal macrosomia in term pregnancies. A prospective study. Eur J Endocrinol 2005;153(6):887-94.	E	TA												X
808	Clausen T, Oyen N, Henriksen T. Pregnancy complications by overweight and residential area. A prospective study of an urban Norwegian cohort. Acta Obstet Gynecol Scand 2006;85(5):526-33.	E	TA												X
809	Clausen TD, Mathiesen ER, Hansen T, Pedersen O, Jensen DM, Lauenborg J, et al. Overweight and the metabolic syndrome in adult offspring of women with diet-treated gestational diabetes mellitus or type 1 diabetes. J Clin Endocrinol Metab 2009;94(7):2464-70.	E	TA												X
810	Clays E, Van Herck K, De Buyzere M, Kornitzer M, Kittel F, De Backer G, et al. Behavioural and psychosocial correlates of nondipping blood pressure pattern among middle-aged men and women at work. J Hum Hypertens 2012;26(6):381-7.	E	TA												X
811	Cleland VJ, Ball K, Magnussen C, Dwyer T, Venn A. Socioeconomic position and the tracking of physical activity and cardiorespiratory fitness from childhood to adulthood. American Journal of Epidemiology 2009;170(9):1069-1077.	E	TA												X
812	Climent VE, Pico A, Sogorb F, Aznar S, Lip GYH, Marin F. Growth hormone therapy and the heart. American Journal of Cardiology 2006;97(7):1097-1102.	E	TA												X
813	Clinton Smith J. The current epidemic of childhood obesity and its implications for future coronary heart disease. Pediatric Clinics of North America 2004;51(6 SPEC. ISS.):1679-1695.	E	TA	X
814	Closset J, Mehdi A, Barea M, Buedts K, Gelin M, Houben JJ. Results of silastic ring vertical gastroplasty more than 6 years after surgery: Analysis of a cohort of 214 patients. Obesity Surgery 2004;14(9):1233-1236.	E	TA												X
815	Coall DA, Chisholm JS. Evolutionary perspectives on pregnancy: maternal age at menarche and infant birth weight. Social Science & Medicine 2003;57(10):1771-1781.	E	TA												X
816	Cobas RA, Santos B, Da Silva PC, Neves R, Gomes MB. Progression to microalbuminuria in patients with type 1 diabetes: A seven-year prospective study. Diabetology and Metabolic Syndrome 2011;3(1).	E	TA												X
817	Cobourn C, Degboe A, Super PA, Torre M, Robinson J, Jin J, et al. Safety and effectiveness of LAP-BAND AP System: results of Helping Evaluate Reduction in Obesity (HERO) prospective registry study at 1 year. J Am Coll Surg 2013;217(5):907-18.	E	TA												X
818	Cocito D, Paolasso I, Antonini G, Benedetti L, Briani C, Comi C, et al. A nationwide retrospective analysis on the effect of immune therapies in patients with chronic inflammatory demyelinating polyradiculoneuropathy. European Journal of Neurology 2010;17(2):289-294.	E	TA												X
819	Cockerham WC. Health lifestyles in Russia. Soc Sci Med 2000;51(9):1313-24.	E	TA												X
820	Coelho Mde A, Katz L, Coutinho I, Hofmann A, Miranda L, Amorim M. Profile of women admitted at an obstetric ICU due to non-obstetric causes. Rev Assoc Med Bras 2012;58(2):160-7.	E	TA												X
821	Coggins CH, Breyer Lewis J, Caggiula AW, Castaldo LS, Klahr S, Wang SR. Differences between women and men with chronic renal disease. Nephrol Dial Transplant 1998;13(6):1430-7.	E	TA												X
822	Coghill AE, Hansen S, Littman AJ. Risk factors for eclampsia: a population-based study in Washington State, 1987-2007. American Journal of Obstetrics and Gynecology 2011;205(6).	E	TA												X
823	Cohen HW, Hailpern SM, Fang J, Alderman MH. Sodium intake and mortality in the NHANES II follow-up study. American Journal of Medicine 2006;119(3).	E	TA												X
824	Cohen M, Syme C, Deforest M, Wells G, Detzler G, Cheng HL, et al. Ectopic fat in youth: The contribution of hepatic and pancreatic fat to metabolic disturbances. Obesity 2014;22(5):1280-1286.	E	TA												X
825	Cohn HI, Xi Y, Pesant S, Harris DM, Hyslop T, Falkner B, et al. G protein-coupled receptor kinase 2 expression and activity are associated with blood pressure in black Americans. Hypertension 2009;54(1):71-6.	E	TA												X
826	Colao A, Pivonello R, Di Somma C, Tauchmanova L, Savastano S, Lombardi G. Growth hormone excess with onset in adolescence: clinical appearance and long-term treatment outcome. Clin Endocrinol (Oxf) 2007;66(5):714-22.	E	TA												X
827	Colao A, Spiezia S, Di Somma C, Pivonello R, Marzullo P, Rota F, et al. Circulating insulin-like growth factor-I levels are correlated with the atherosclerotic profile in healthy subjects independently of age. J Endocrinol Invest 2005;28(5):440-8.	E	TA												X
828	Collaku A, Rankinen T, Rice T, Leon AS, Rao DC, Skinner JS, et al. A genome-wide linkage scan for dietary energy and nutrient intakes: the Health, Risk Factors, Exercise Training, and Genetics (HERITAGE) Family Study. Am J Clin Nutr 2004;79(5):881-6.	E	TA												X
829	Collins RT, II, Phomakay V, Zarate YA, Tang X. Impact of Aortic Aneurysm on Hospitalizations in Patients with Marfan Syndrome: A Multi-Institutional Study. Pediatric Cardiology 2015;36(1):132-139.	E	TA												X
830	Collins TC, Petersen NJ, Menke TJ, Souchek J, Foster W, Ashton CM. Short-term, intermediate-term, and long-term mortality in patients hospitalized for stroke. Journal of Clinical Epidemiology 2003;56(1):81-87.	E	TA												X
831	Colmenares A, Pinto G, Taupin P, Giuseppe A, Odent T, Trivin C, et al. Effects on Growth and Metabolism of Growth Hormone Treatment for 3 Years in 36 Children with Prader-Willi Syndrome. Hormone Research in Paediatrics 2011;75(2):123-130.	E	TA												X
832	Colombo C, Costantini D, Rocchi A, Romano G, Rossi G, Bianchi ML, et al. Effects of liver transplantation on the nutritional status of patients with cystic fibrosis. Transpl Int 2005;18(2):246-55.	E	TA												X
833	Comi-Diaz C, Miralles-Garcia JM, Cabrerizo L, Perez M, Masramon X, De Pablos-Velasco P. [Cardiovascular risk factor control in a population with longstanding diabetes attending endocrinology departments]. Endocrinol Nutr 2010;57(10):472-8.	E	TA												X
834	Conde-Agudelo A, Belizan JM. Risk factors for pre-eclampsia in a large cohort of Latin American and Caribbean women. BJOG 2000;107(1):75-83.	E	TA												X
835	Conde-Agudelo A, Belizán JM, Díaz-Rossello JL. Epidemiology of fetal death in Latin America. Acta Obstetricia et Gynecologica Scandinavica 2000;79(5):371-378.	E	TA												X
836	Conen D, Adam M, Roche F, Barthelemy J-C, Dietrich DF, Imboden M, et al. Premature Atrial Contractions in the General Population Frequency and Risk Factors. Circulation 2012;126(19):2302-2308.	E	TA												X
837	Conen D, Glynn RJ, Ridker PM, Buring JE, Albert MA. Socioeconomic status, blood pressure progression, and incident hypertension in a prospective cohort of female health professionals. Eur Heart J 2009;30(11):1378-84.	E	TA												X
838	Conlisk AJ, Barnhart HX, Martorell R, Grajeda R, Stein AD. Maternal and child nutritional supplementation are inversely associated with fasting plasma glucose concentration in young Guatemalan adults. J Nutr 2004;134(4):890-7.	E	TA												X
839	Conti CR. Obesity Is Not only an Adult Problem. Clinical Cardiology 2004;27(4):183-184.	E	TA												X
840	Conti V, Esposito A, Cagliuso M, Fantauzzi A, Pastori D, Mezzaroma I, et al. Undifferentiated Connective Tissue Disease - an Unsolved Problem: Revision of Literature and Case Studies. International Journal of Immunopathology and Pharmacology 2010;23(1):271-278.	E	TA												X
841	Conus F, Allison DB, Rabasa-Lhoret R, St-Onge M, St-Pierre DH, Tremblay-Lebeau A, et al. Metabolic and behavioral characteristics of metabolically obese but normal-weight women. J Clin Endocrinol Metab 2004;89(10):5013-20.	E	TA												X
842	Conway B, Miller RG, Costacou T, Fried L, Kelsey S, Evans RW, et al. Double-edged relationship between adiposity and coronary artery calcification in type 1 diabetes. Diabetes and Vascular Disease Research 2007;4(4):332-339.	E	TA												X
843	Cook A, Osler T, Gaudet M, Berne J, Norwood S. Blunt Cerebrovascular Injury Is Poorly Predicted by Modeling With Other Injuries: Analysis of NTDB Data. Journal of Trauma-Injury Infection and Critical Care 2011;71(1):114-119.	E	TA												X
844	Cook DG, Mendall MA, Whincup PH, Carey IM, Ballam L, Morris JE, et al. C-reactive protein concentration in children: relationship to adiposity and other cardiovascular risk factors. Atherosclerosis 2000;149(1):139-50.	E	TA												X
845	Cook KA, Meyer BM. Blood pressure and body composition changes in women. Prev Med 1981;10(5):639-44.	E	TA												X	Baseline average age 41 years
846	Cook NR, Rosner BA, Chen W, Srinivasan SR, Berenson GS. Using the area under the curve to reduce measurement error in predicting young adult blood pressure from childhood measures. Stat Med 2004;23(22):3421-35.	E	F												X	Another study by BHS included
847	Cook S, Auinger P, Huang TTK. Growth Curves for Cardio-Metabolic Risk Factors in Children and Adolescents. Journal of Pediatrics 2009;155(3):S6.e15-S6.e26.	E	F												X
848	Cook-Huynh M, Ansong D, Steckelberg RC, Boakye I, Seligman K, Appiah L, et al. Prevalence of hypertension and diabetes mellitus in adults from a rural community in Ghana. Ethn Dis 2012;22(3):347-52.	E	TA												X
849	Cooper R, Atherton K, Power C. Gestational age and risk factors for cardiovascular disease: evidence from the 1958 British birth cohort followed to mid-life. Int J Epidemiol 2009;38(1):235-44.	E	TA												X
850	Cooper R, Pereira SMP, Power C, Hyppoenen E. Parental obesity and risk factors for cardiovascular disease among their offspring in mid-life: findings from the 1958 British Birth Cohort Study. International Journal of Obesity 2013;37(12):1590-1596.	E	F												X
851	Cooper WN, Khulan B, Owens S, Elks CE, Seidel V, Prentice AM, et al. DNA methylation profiling at imprinted loci after periconceptional micronutrient supplementation in humans: Results of a pilot randomized controlled trial. FASEB Journal 2012;26(5):1782-1790.	E	TA												X
852	Copeland WE, Shanahan L, Worthman C, Angold A, Costello EJ. Cumulative depression episodes predict later C-reactive protein levels: a prospective analysis. Biol Psychiatry 2012;71(1):15-21.	E	TA												X
853	Coppini LZ, Bertevello PL, Gama-Rodrigues J, Waitzberg DL. Changes in insulin sensitivity in morbidly obese patients with or without metabolic syndrome after gastric bypass. Obes Surg 2006;16(11):1520-5.	E	TA												X
854	Corbett JJ. The first Jacobson Lecture. Familial idiopathic intracranial hypertension. J Neuroophthalmol 2008;28(4):337-47.	E	TA												X
855	Corbett JJ. Familial idiopathic intracranial hypertension. Journal of Neuro-Ophthalmology 2008;28(4):337-347.	Duplicate													Duplicate
856	Corey KE, Stanley TL, Misdraji J, Scirica C, Pratt J, Hoppin A, et al. Prevalence and outcome of non-alcoholic fatty liver disease in adolescents and young adults undergoing weight loss surgery. Pediatric Obesity 2014;9(5):e91-e93.	E	TA												X
857	Cornean RE, Hindmarsh PC, Brook CG. Obesity in 21-hydroxylase deficient patients. Arch Dis Child 1998;78(3):261-3.	E	TA												X
858	Cornwall JW, Green RS, Nielsen JC, Gelb BD. Frequency of Aortic Dilation in Noonan Syndrome. American Journal of Cardiology 2014;113(2):368-371.	E	TA												X
859	Corona G, Monami M, Boddi V, Rastrelli G, Melani C, Balzi D, et al. Pulse pressure independently predicts major cardiovascular events in younger but not in older subjects with erectile dysfunction. J Sex Med 2011;8(1):247-54.	E	TA												X
860	Corona G, Rastrelli G, Monami M, Melani C, Balzi D, Sforza A, et al. Body mass index regulates hypogonadism-associated CV risk: Results from a cohort of subjects with erectile dysfunction. Journal of Sexual Medicine 2011;8(7):2098-2105.	E	TA												X
861	Corripio R, Gonzalez-Clemente J-M, Perez-Sanchez J, Naef S, Gallart L, Nosas R, et al. Weight loss in prepubertal obese children is associated with a decrease in adipocyte fatty-acid-binding protein without changes in lipocalin-2: a 2-year longitudinal study. European Journal of Endocrinology 2010;163(6):887-893.	E	TA												X
862	Corripio R, Gonzalez-Clemente J-M, Perez-Sanchez J, Naef S, Gallart L, Vendrell J, et al. Plasma brain-derived neurotrophic factor in prepubertal obese children: results from a 2-year lifestyle intervention programme. Clinical Endocrinology 2012;77(5):715-720.	E	TA												X
863	Cortez-Dias N, Martins SR, Belo A, Fiuza M. Association of metabolic risk factors with uncontrolled hypertension: comparison of the several definitions of metabolic syndrome. J Hypertens 2013;31(10):1991-7.	E	TA												X
864	Corti S, Bordoni A, Ronchi D, Musumeci O, Aguennouz M, Toscano A, et al. Clinical features and new molecular findings in carnitine palmitoyltransferase II (CPT II) deficiency. Journal of the Neurological Sciences 2008;266(1-2):97-103.	E	TA												X
865	Corvalan C, Uauy R, Kain J, Martorell R. Obesity indicators and cardiometabolic status in 4-y-old children. Am J Clin Nutr 2010;91(1):166-74.	E	TA		X										X
866	Corvalán C, Uauy R, Stein AD, Kain J, Martorell R. Effect of growth on cardiometabolic status at 4 y of age. American Journal of Clinical Nutrition 2009;90(3):547-555.	E	TA												X
867	Cosenzi A, Sacerdote A, Bocin E, Molino R, Seculin P, Plazzotta N, et al. Follow up of young people with high casual blood pressure. Journal of Human Hypertension 1996;10(SUPPL. 3):S71-S75.	E	Full												X	Special Population
868	Costacou T, Edmundowicz D, Prince C, Conway B, Orchard TJ. Progression of coronary artery calcium in type 1 diabetes mellitus. Am J Cardiol 2007;100(10):1543-7.	E	TA												X
869	Costacou T, Ferrell RE, Orchard TJ. Haptoglobin genotype: a determinant of cardiovascular complication risk in type 1 diabetes. Diabetes 2008;57(6):1702-6.	E	TA												X
870	Costacou T, Zgibor JC, Evans RW, Otvos J, Lopes-Virella MF, Tracy RP, et al. The prospective association between adiponectin and coronary artery disease among individuals with type 1 diabetes. The Pittsburgh Epidemiology of Diabetes Complications Study. Diabetologia 2005;48(1):41-8.	E	TA												X
871	Cotreau MM, Warren S, Ryan JL, Fleckenstein L, Vanapalli SR, Brown KR, et al. The antiparasitic moxidectin: Safety, tolerability, and pharmacokinetics in humans. Journal of Clinical Pharmacology 2003;43(10):1108-1115.	E	TA												X
872	Cottrell N, Abbott L. Cardiovascular. Journal of Pharmacy Practice and Research 2011;41(1):62-72.	E	TA												X
873	Couch SC, Crandell JL, Shah AS, Dolan LM, Merchant AT, Liese AD, et al. Fructose intake and cardiovascular risk factors in youth with type 1 diabetes: SEARCH for diabetes in youth study. Diabetes Research and Clinical Practice 2013;100(2):265-271.	E	TA												X
874	Couchoud C, Lassalle M, Stengel B, Jacquelinet C. [Renal Epidemiology and Information Network: 2007 annual report ]. Nephrol Ther 2009;5 Suppl 1:S3-144.	E	TA												X
875	Counil E, Dewailly E, Bjerregaard P, Julien P. Trans-polar-fat: all Inuit are not equal. British Journal of Nutrition 2008;100(4):703-706.	E	TA												X
876	Couper RT, Corey M, Durie PR, Forstner GG, Moore DJ. Longitudinal evaluation of serum trypsinogen measurement in pancreatic-insufficient and pancreatic-sufficient patients with cystic fibrosis. J Pediatr 1995;127(3):408-13.	E	TA												X
877	Courcoulas AP, Christian NJ, Belle SH, Berk PD, Flum DR, Garcia L, et al. Weight change and health outcomes at 3 years after bariatric surgery among individuals with severe obesity. JAMA 2013;310(22):2416-25.	E	TA												X
878	Cournot M, Bura A, Cambou JP, Taraszkiewicz D, Maloizel J, Galinier M, et al. Arterial ultrasound screening as a tool for coronary risk assessment in asymptomatic men and women. Angiology 2012;63(4):282-288.	E	TA												X
879	Courtillot C, Baudoin R, Du Souich T, Saatdjian L, Tejedor I, Pinto G, et al. Monocentric study of 112 consecutive patients with childhood onset GH deficiency around and after transition. European Journal of Endocrinology 2013;169(5):587-596.	E	TA												X
880	Cousins JH, Rubovits DS, Dunn JK, Reeves RS, Ramirez AG, Foreyt JP. Family versus individually oriented intervention for weight loss in Mexican American women. Public Health Reports 1992;107(5):549-555.	E	TA												X
881	Cousminer DL, Stergiakouli E, Berry DJ, Ang W, Groen-Blokhuis MM, Korner A, et al. Genome-wide association study of sexual maturation in males and females highlights a role for body mass and menarche loci in male puberty. Hum Mol Genet 2014;23(16):4452-64.	E	TA												X
882	Coyne KS, Kaplan SA, Chapple CR, Sexton CC, Kopp ZS, Bush EN, et al. Risk factors and comorbid conditions associated with lower urinary tract symptoms: EpiLUTS. Bju International 2009;103:24-32.	E	TA												X
883	Cozzi F, Marson P, Cardarelli S, Favaro M, Tison T, Tonello M, et al. Prognosis of scleroderma renal crisis: a long-term observational study. Nephrology Dialysis Transplantation 2012;27(12):4398-4403.	E	TA												X
884	Crankshaw DP, Chan C, Leslie K, Bjorksten AR. Remifentanil concentration during target-controlled infusion of propofol. Anaesth Intensive Care 2002;30(5):578-83.	E	TA												X
885	Crawford AG, Cote C, Couto J, Daskiran M, Gunnarsson C, Haas K, et al. Prevalence of obesity, type II diabetes mellitus, hyperlipidemia, and hypertension in the United States: findings from the GE Centricity Electronic Medical Record database. Popul Health Manag 2010;13(3):151-61.	E	TA		X										X
886	Crawford PB, Story M, Wang MC, Ritchie LD, Sabry ZI. Ethnic issues in the epidemiology of childhood obesity. Pediatr Clin North Am 2001;48(4):855-78.	E	TA												X
887	Cree-Green M, Newcomer BR, Coe G, Newnes L, Baumgartner A, Brown MS, et al. Peripheral insulin resistance in obese girls with hyperandrogenism is related to oxidative phosphorylation and elevated serum free fatty acids. American Journal of Physiology-Endocrinology and Metabolism 2015;308(9):E726-E733.	E	TA												X
888	Crispi F, Bijnens B, Figueras F, Bartrons J, Eixarch E, Le Noble F, et al. Fetal growth restriction results in remodeled and less efficient hearts in children. Circulation 2010;121(22):2427-36.	E	TA												X
889	Croft JB, Foster TA, Parker FC, Cresanta JL, Hunter SM, Webber LS, et al. Transitions of cardiovascular risk from adolescence to young adulthood - The Bogalusa Heart Study: II. Alterations in anthropometric blood pressure and serum lipoprotein variables. Journal of Chronic Diseases 1986;39(2):91-103.	E	TA												X	aged 11-15 at base-line followed 6 years later
890	Croteau SE, Kozakewich HPW, Perez-Atayde AR, Fishman SJ, Alomari AI, Chaudry G, et al. Kaposiform Lymphangiomatosis: A Distinct Aggressive Lymphatic Anomaly. Journal of Pediatrics 2014;164(2):383-388.	E	TA												X
891	Croteau-Chonka DC, Lange LA, Lee NR, Adair LS, Mohlke KL. Replication of LIN28B SNP association with age of menarche in young Filipino women. Pediatr Obes 2013;8(5):e50-3.	E	TA												X
892	Crow TA, Brown R, Hubbard EJ, Copeland LR. Assessing potential predisposition of elementary school children to heart disease. J Sch Health 1982;52(10):601-4.	E	TA		X										X
893	Crowe FL, Skeaff CM, Green TJ, Gray AR. Serum fatty acids as biomarkers of fat intake predict serum cholesterol concentrations in a population-based survey of New Zealand adolescents and adults. Am J Clin Nutr 2006;83(4):887-94.	E	TA												X
894	Cruickshank JK, Mzayek F, Liu L, Kieltyka L, Sherwin R, Webber LS, et al. Origins of the "black/white" difference in blood pressure: Roles of birth weight, postnatal growth, early blood pressure, and adolescent body size - The Bogalusa heart study. Circulation 2005;111(15):1932-1937.	E	F												X	FU-birth to 17 years
895	Cubeddu LX, Hoffmann IS. Metabolic Syndrome: An All or None or a Continuum Load of Risk? Metabolic Syndrome and Related Disorders 2012;10(1):14-19.	E	TA												X
896	Cunnane SC. Childhood origins of lifestyle-related risk factors for coronary heart disease in adulthood. Nutr Health 1993;9(2):107-15.	E	TA												X
897	Cunningham TJ, Seeman TE, Kawachi I, Gortmaker SL, Jacobs DR, Kiefe CI, et al. Racial/ethnic and gender differences in the association between self-reported experiences of racial/ethnic discrimination and inflammation in the CARDIA cohort of 4 US communities. Soc Sci Med 2012;75(5):922-31.	E	TA												X
898	Cunnington M, Webb D, Qizilbash N, Blum D, Mander A, Funk MJ, et al. Risk of ischaemic cardiovascular events from selective cyclooxygenase-2 inhibitors in osteoarthritis. Pharmacoepidemiology and Drug Safety 2008;17(6):601-608.	E	TA												X
899	Cupisti S, Giltay EJ, Gooren LJ, Kronawitter D, Oppelt PG, Beckmann MW, et al. The impact of testosterone administration to female-to-male transsexuals on insulin resistance and lipid parameters compared with women with polycystic ovary syndrome. Fertil Steril 2010;94(7):2647-53.	E	TA												X
900	Cupisti S, Haeberle L, Schell C, Richter H, Schulze C, Hildebrandt T, et al. The different phenotypes of polycystic ovary syndrome: no advantages for identifying women with aggravated insulin resistance or impaired lipids. Exp Clin Endocrinol Diabetes 2011;119(8):502-8.	E	TA												X
901	Cupul-Uicab LA, Hernandez-Avila M, Terrazas-Medina EA, Pennell ML, Longnecker MP. Prenatal exposure to the major DDT metabolite 1,1-dichloro-2,2-bis(p-chlorophenyl)ethylene (DDE) and growth in boys from Mexico. Environ Res 2010;110(6):595-603.	E	TA												X
902	Cupul-Uicab LA, Skjaerven R, Haug K, Melve KK, Engel SM, Longnecker MP. In utero exposure to maternal tobacco smoke and subsequent obesity, hypertension, and gestational diabetes among women in the MoBa cohort. Environ Health Perspect 2012;120(3):355-60.	E	TA												X
903	Cupul-Uicab LA, Skjaerven R, Haug K, Travlos GS, Wilson RE, Eggesbo M, et al. Exposure to tobacco smoke in utero and subsequent plasma lipids, ApoB, and CRP among adult women in the MoBa cohort. Environ Health Perspect 2012;120(11):1532-7.	E	TA												X
904	Curocichin G, Wu Y, McDade TW, Kuzawa CW, Borja JB, Qin L, et al. Single-nucleotide polymorphisms at five loci are associated with C-reactive protein levels in a cohort of Filipino young adults. J Hum Genet 2011;56(12):823-7.	E	TA												X
905	Curry TB, Somaraju M, Hines CN, Groenewald CB, Miles JM, Joyner MJ, et al. Sympathetic support of energy expenditure and sympathetic nervous system activity after gastric bypass surgery. Obesity (Silver Spring) 2013;21(3):480-5.	E	TA												X
906	Curtis JR, John A, Baser O. Dyslipidemia and changes in lipid profiles associated with rheumatoid arthritis and initiation of anti-tumor necrosis factor therapy. Arthritis Care & Research 2012;64(9):1282-1291.	E	TA												X
907	Cuspidi C, Meani S, Negri F, Giudici V, Valerio C, Sala C, et al. Indexation of left ventricular mass to body surface area and height to allometric power of 2.7: is the difference limited to obese hypertensives? J Hum Hypertens 2009;23(11):728-34.	E	TA												X
908	Czerwinski SA, Lee M, Choh AC, Wurzbacher K, Demerath EW, Towne B, et al. Genetic factors in physical growth and development and their relationship to subsequent health outcomes. Am J Hum Biol 2007;19(5):684-91.	E	TA												X
909	D'Alessandro C, Morelli E, Evangelisti I, Galetta F, Franzoni F, Lazzeri D, et al. Profiling the diet and body composition of subelite adolescent rhythmic gymnasts. Pediatr Exerc Sci 2007;19(2):215-27.	E	TA												X
910	D'Andrea A, Cocchia R, Riegler L, Salerno G, Scarafile R, Citro R, et al. Aortic Stiffness and Distensibility in Top-Level Athletes. Journal of the American Society of Echocardiography 2012;25(5):561-567.	E	TA												X
911	d'Avella D, Servadei F, Scerrati M, Tomei G, Brambilla G, Angileri FF, et al. Traumatic intracerebellar hemorrhage: Clinicoradiological analysis of 81 patients. Neurosurgery 2002;50(1):16-25.	E	TA												X
912	D'Onise K, Lynch JW, McDermott RA. Does an early childhood intervention affect cardiometabolic risk in adulthood? Evidence from a longitudinal study of preschool attendance in South Australia. Public Health 2012;126(8):682-9.	E	TA												X
913	D'Onise K, McDermott RA, Campbell SK. Benefits of modest weight or waist circumference loss in a remote North Queensland Indigenous population. Aust N Z J Public Health 2013;37(4):345-9.	E	TA												X
914	da Costa Rodrigues T, Pecis M, Azevedo MJd, Esteves JF, Gross JL. Ambulatory blood pressure monitoring and progression of retinopathy in normotensive, normoalbuminuric type 1 diabetic patients: A 6-year follow-up study. Diabetes Research and Clinical Practice 2006;74(2):135-140.	E	TA												X
915	da Rocha Araujo FD, de Andrade Goulart EM, Alves Meira ZM. Use of Doppler Echocardiography to Support the Decision to Discontinue Secondary Prophylaxis for Patients With Rheumatic Fever and Normal Cardiac Auscultation. Pediatric Cardiology 2013;34(5):1073-1080.	E	TA												X
916	da Rocha CM, Kac G. High dietary ratio of omega-6 to omega-3 polyunsaturated acids during pregnancy and prevalence of post-partum depression. Matern Child Nutr 2012;8(1):36-48.	E	TA												X
917	da Sliva B, Gapstur SM, Achenbach YH, Schuh TS, Kotlar TJ, Liu K, et al. Lack of association between the -308 polymorphism of the tumor necrosis factor-alpha gene and the insulin resistance syndrome. J Investig Med 2000;48(4):236-44.	E	TA												X
918	Daemers DOA, Wijnen HAA, Van Limbeek EBM, Budé LM, Nieuwenhuijze MJ, Spaanderman MEA, et al. The impact of obesity on outcomes of midwife-led pregnancy and childbirth in a primary care population: A prospective cohort study. BJOG: An International Journal of Obstetrics and Gynaecology 2014;121(11):1403-1413.	E	TA												X
919	Dagogo-Jack S, Edeoga C, Ebenibo S, Chapp-Jumbo E. Pathobiology of Prediabetes in a Biracial Cohort (POP-ABC) study: baseline characteristics of enrolled subjects. J Clin Endocrinol Metab 2013;98(1):120-8.	E	TA												X
920	Dahlman I, Dicker A, Jiao H, Kere J, Blomqvist L, Van Harmelen V, et al. A common haplotype in the G-protein-coupled receptor gene GPR74 is associated with leanness and increased lipolysis. American Journal of Human Genetics 2007;80(6):1115-1124.	E	TA												X
921	Dai S, Fulton JE, Harrist RB, Grunbaum JA, Steffen LM, Labarthe DR. Blood Lipids in Children: Age-Related Patterns and Association with Body-Fat Indices. Project HeartBeat! American Journal of Preventive Medicine 2009;37(1 SUPPL.):S56-S64.	E	F												X	No adult data
922	Dai S, Harrist RB, Rosenthal GL, Labarthe DR. Effects of body size and body fatness on left ventricular mass in children and adolescents: Project HeartBeat! Am J Prev Med 2009;37(1 Suppl):S97-104.	E	TA												X
923	Dai S, Labarthe DR, Grunbaum JA, Harrist RB, Mueller WH. Longitudinal analysis of changes in indices of obesity from age 8 years to age 18 years. Project HeartBeat! Am J Epidemiol 2002;156(8):720-9.	E	F												X	No link between childhood adiposity and adult cvd
924	Dalal S, Jose Beunza J, Volmink J, Adebamowo C, Bajunirwe F, Njelekela M, et al. Non-communicable diseases in sub-Saharan Africa: what we know now. International Journal of Epidemiology 2011;40(4):885-901.	E	TA												X
925	Dalfo Baque A, Badia Llach X, Roca-Cusachs Coll A, Aristegui Ruiz I, Roset Gamisans M. [Validation of the quality of life questionnaire in arterial hypertension (HQALY) for its use in Spain. Relationship between clinical variables and quality of life. Investigator Group of the HQALY study]. Aten Primaria 2000;26(2):96-103.	E	TA												X
926	Dallal RM, Hatalski A, Trang A, Chernoff A. Longitudinal analysis of cardiovascular parameters after gastric bypass surgery. Surg Obes Relat Dis 2012;8(6):703-9.	E	TA												X
927	Dalman C, Allebeck P, Cullberg J, Grunewald C, Koster M. Obstetric complications and the risk of schizophrenia - A longitudinal study of a national birth cohort. Archives of General Psychiatry 1999;56(3):234-240.	E	TA												X
928	Daly B, Scragg R, Schaaf D, Metcalf P. Low birth weight and cardiovascular risk factors in Auckland adolescents: a retrospective cohort study. N Z Med J 2005;118(1220):U1612.	E	TA												X
929	Danduran MJ, Earing MG, Sheridan DC, Ewalt LA, Frommelt PC. Chest pain: Characteristics of children/adolescents. Pediatric Cardiology 2008;29(4):775-781.	E	TA												X
930	Danese A, Moffitt TE, Harrington H, Milne BJ, Polanczyk G, Pariante CM, et al. Adverse childhood experiences and adult risk factors for age-related disease: depression, inflammation, and clustering of metabolic risk markers. Arch Pediatr Adolesc Med 2009;163(12):1135-43.	E	TA												X
931	Dangardt F, Chen Y, Berggren K, Osika W, Friberg P. Increased Rate of Arterial Stiffening with Obesity in Adolescents: A Five-Year Follow-Up Study. PLoS ONE 2013;8(2).	E	F												X
932	Daniel GW, Menis M, Sridhar G, Scott D, Wallace AE, Ovanesov MV, et al. Immune globulins and thrombotic adverse events as recorded in a large administrative database in 2008 through 2010. Transfusion 2012;52(10):2113-21.	E	TA												X
933	Danielsen I, Granstroem C, Rytter D, Hammer Bech B, Brink Henriksen T, Vaag AA, et al. Does physical activity during pregnancy adversely influence markers of the metabolic syndrome in adult offspring? A prospective study over two decades. Journal of Epidemiology and Community Health 2013;67(8):648-654.	E	TA												X
934	Danileviciute A, Grazuleviciene R, Paulauskas A, Nadisauskiene R, Nieuwenhuijsen MJ. Low level maternal smoking and infant birthweight reduction: genetic contributions of GSTT1 and GSTM1 polymorphisms. BMC Pregnancy Childbirth 2012;12:161.	E	TA												X
935	Dapena M, Jimenez B, Noguera-Julian A, Soler-Palacin P, Fortuny C, Lahoz R, et al. Metabolic disorders in vertically HIV-infected children: future adults at risk for cardiovascular disease. J Pediatr Endocrinol Metab 2012;25(5-6):529-35.	E	TA												X
936	Daraki V, Georgiou V, Papavasiliou S, Chalkiadaki G, Karahaliou M, Koinaki S, et al. Metabolic profile in early pregnancy is associated with offspring adiposity at 4 years of age: The Rhea pregnancy cohort Crete, Greece. PLoS ONE 2015;10(5).	E	TA												X
937	Daratha KB, Bindler RC. Effects of individual components, time, and sex on prevalence of metabolic syndrome in adolescents. Archives of Pediatrics and Adolescent Medicine 2009;163(4):365-370.	E	TA		X										X
938	Dasgupta K. Sex differences in the development of higher systolic blood pressure during adolescence. Cardiology Review 2008;25(5):54-57.	E	TA												X
939	Dasgupta K, O'Loughlin J, Chen S, Karp I, Paradis G, Tremblay J, et al. Emergence of sex differences in prevalence of high systolic blood pressure: analysis of a longitudinal adolescent cohort. Circulation 2006;114(24):2663-70.	E	F												X	No adult data. The mean (SD) age of participants in grades 7, 9, and 11 was 12.8 (0.6), 15.2 (0.4), and 17.0
940	Davey Smith G, Sterne JAC, Fraser A, Tynelius P, Lawlor DA, Rasmussen F. The association between BMI and mortality using offspring BMI as an indicator of own BMI: large intergenerational mortality study. BMJ (Clinical research ed.) 2009;339:b5043-b5043.	E	TA												X
941	David McIntyre H, Gibbons KS, Flenady VJ, Callaway LK. Overweight and obesity in Australian mothers: Epidemic or endemic? Medical Journal of Australia 2012;196(3):184-188.	E	TA												X
942	Davidson K, MacGregor MW, Stuhr J, Dixon K, MacLean D. Constructive anger verbal behavior predicts blood pressure in a population-based sample. Health Psychol 2000;19(1):55-64.	E	TA												X
943	Davies AA, Smith GD, Ben-Shlomo Y, Litchfield P. Low birth weight is associated with higher adult total cholesterol concentration in men: findings from an occupational cohort of 25,843 employees. Circulation 2004;110(10):1258-62.	E	TA												X
944	Daviglus ML, Pirzada A, Talavera GA. Cardiovascular disease risk factors in the Hispanic/Latino population: lessons from the Hispanic Community Health Study/Study of Latinos (HCHS/SOL). Prog Cardiovasc Dis 2014;57(3):230-6.	E	TA												X
945	Davila-Rodriguez MI, Torres-De la Cruz VM, Novelo-Huerta HI, Said-Fernandez S, Cerda-Flores RM, Cortes-Gutierrez EI. Total homocysteine levels in healthy children from the Monterrey metropolitan area, Mexico. Prague Med Rep 2010;111(2):135-41.	E	TA												X
946	Davis JN, Gunderson EP, Gyllenhammer LE, Goran MI. Impact of gestational diabetes mellitus on pubertal changes in adiposity and metabolic profiles in Latino offspring. J Pediatr 2013;162(4):741-5.	E	TA												X
947	Davis PH, Dawson JD, Riley WA, Lauer RM. Carotid intimal-medial thickness is related to cardiovascular risk factors measured from childhood through middle age: The Muscatine Study. Circulation 2001;104(23):2815-9.	E	TA												X
948	Davis SK, Gebreab S, Quarells R, Gibbons GH. Social determinants of cardiovascular health among black and white women residing in Stroke Belt and Buckle regions of the South. Ethn Dis 2014;24(2):133-43.	E	TA												X
949	Davison KA, Negrato CA, Cobas R, Matheus A, Tannus L, Palma CS, et al. Relationship between adherence to diet, glycemic control and cardiovascular risk factors in patients with type 1 diabetes: a nationwide survey in Brazil. Nutr J 2014;13:19.	E	TA												X
950	Dawson JD, Sonka M, Blecha MB, Lin W, Davis PH. Risk factors associated with aortic and carotid intima-media thickness in adolescents and young adults: the Muscatine Offspring Study. J Am Coll Cardiol 2009;53(24):2273-9.	E	TA												X
951	Dawson SI. Glucose tolerance in pregnancy and the long-term risk of cardiovascular disease. Diabetes Research and Clinical Practice 2009;85(1):14-19.	E	TA												X
952	De Boeck K, Weren M, Proesmans M, Kerem E. Pancreatitis among patients with cystic fibrosis: Correlation with pancreatic status and genotype. Pediatrics 2005;115(4):e463-e469.	E	TA												X
953	de Boer IH, Sibley SD, Kestenbaum B, Sampson JN, Young B, Cleary PA, et al. Central obesity, incident microalbuminuria, and change in creatinine clearance in the epidemiology of diabetes interventions and complications study. J Am Soc Nephrol 2007;18(1):235-43.	E	TA												X
954	de Boysson H, Zuber M, Naggara O, Neau J-P, Gray F, Bousser M-G, et al. Primary Angiitis of the Central Nervous System Description of the First Fifty-Two Adults Enrolled in the French Cohort of Patients With Primary Vasculitis of the Central Nervous System. Arthritis & Rheumatology 2014;66(5):1315-1326.	E	TA												X
955	De Bruin ML, Dorresteijn LDA, van't Veer MB, Krol ADG, van der Pal HJ, Kappelle AC, et al. Increased Risk of Stroke and Transient Ischemic Attack in 5-Year Survivors of Hodgkin Lymphoma. Journal of the National Cancer Institute 2009;101(13):928-937.	E	TA												X
956	De Caro E, Fioredda F, Calevo MG, Smeraldi A, Saitta M, Hanau G, et al. Exercise capacity in apparently healthy survivors of cancer. Arch Dis Child 2006;91(1):47-51.	E	TA												X
957	de Courten MP, Pettitt DJ, Knowler WC. Hypertension in Pima Indians: prevalence and predictors. Public Health Rep 1996;111 Suppl 2:40-3.	E	F												X	outcome: mean BP (not sbp or dbp)
958	de Groot S, Dallmeijer AJ, Post MW, Angenot EL, van den Berg-Emons RJ, van der Woude LH. Prospective analysis of lipid profiles in persons with a spinal cord injury during and 1 year after inpatient rehabilitation. Arch Phys Med Rehabil 2008;89(3):531-7.	E	TA												X
959	de Groot S, Post MW, Snoek GJ, Schuitemaker M, van der Woude LH. Longitudinal association between lifestyle and coronary heart disease risk factors among individuals with spinal cord injury. Spinal Cord 2013;51(4):314-8.	E	TA												X
960	De Hert M, Schreurs V, Sweers K, Van Eyck D, Hanssens L, Sinko S, et al. Typical and atypical antipsychotics differentially affect long-term incidence rates of the metabolic syndrome in first-episode patients with schizophrenia: a retrospective chart review. Schizophr Res 2008;101(1-3):295-303.	E	TA												X
961	De Jong A, Molinari N, Pouzeratte Y, Verzilli D, Chanques G, Jung B, et al. Difficult intubation in obese patients: incidence, risk factors, and complications in the operating theatre and in intensive care units. Br J Anaesth 2015;114(2):297-306.	E	TA												X
962	de Jongh BE, Paul DA, Hoffman M, Locke R. Effects of pre-pregnancy obesity, race/ethnicity and prematurity. Matern Child Health J 2014;18(3):511-7.	E	TA												X
963	De Kort SWK, Willemsen RH, Van Der Kaay DCM, Hokken-Koelega ACS. The effect of growth hormone treatment on metabolic and cardiovascular risk factors is similar in preterm and term short, small for gestational age children. Clinical Endocrinology 2009;71(1):65-73.	E	TA												X
964	de Kroon L, Drent G, van den Berg AP, Haagsma EB. Current health status of patients who have survived for more than 15 years after liver transplantation. Netherlands Journal of Medicine 2007;65(7):252-258.	E	TA												X
965	de Kroon ML, Renders CM, Kuipers EC, van Wouwe JP, van Buuren S, de Jonge GA, et al. Identifying metabolic syndrome without blood tests in young adults--the Terneuzen Birth Cohort. Eur J Public Health 2008;18(6):656-60.	E	TA												X
966	de Kroon ML, Renders CM, van Wouwe JP, van Buuren S, Hirasing RA. The Terneuzen Birth Cohort: BMI change between 2 and 6 years is most predictive of adult cardiometabolic risk. PLoS One 2010;5(11):e13966.	E	F												X	Exposure change overtime
967	De La Cruz-Muñoz N, Lopez-Mitnik G, Arheart KL, Miller TL, Lipshultz SE, Messiah SE. Effectiveness of bariatric surgery in reducing weight and body mass index among hispanic adolescents. Obesity Surgery 2013;23(2):150-156.	E	TA												X
968	De Lauzon B, Romon M, Deschamps V, Lafay L, Borys JM, Karlsson J, et al. The Three-Factor Eating Questionnaire-R18 is able to distinguish among different eating patterns in a general population. Journal of Nutrition 2004;134(9):2372-2380.	E	TA												X
969	de Leeuw K, Smit AJ, de Groot E, van Roon AM, Kallenberg CG, Bijl M. Longitudinal study on premature atherosclerosis in patients with systemic lupus erythematosus. Atherosclerosis 2009;206(2):546-550.	E	TA												X
970	de Lima SG, de Albuquerque Mde F, de Oliveira JR, Ayres CF, da Cunha JE, de Oliveira DF, et al. Exaggerated blood pressure response during exercise treadmill testing: functional and hemodynamic features, and risk factors. Hypertens Res 2012;35(7):733-8.	E	TA												X
971	De Lucia D, Napolitano M, Di Micco P, Niglio A, Fontanella A, Di Lorio G. Benign intracranial hypertension associated to blood coagulation derangements. Thrombosis Journal 2006;4.	E	TA												X
972	de Mattos AM, Prather J, Olyaei AJ, Shibagaki Y, Keith DS, Mori M, et al. Cardiovascular events following renal transplantation: role of traditional and transplant-specific risk factors. Kidney Int 2006;70(4):757-64.	E	TA												X
973	De Mello ED, Luft VC, Meyer F. Childhood obesity - Towards effectiveness. Jornal de Pediatria 2004;80(3):173-182.	E	TA												X
974	de Mello MT, de Piano A, Carnier J, Sanches PDL, Corrêa FA, Tock L, et al. Long-Term Effects of Aerobic Plus Resistance Training on the Metabolic Syndrome and Adiponectinemia in Obese Adolescents. Journal of Clinical Hypertension 2011;13(5):343-350.	E	TA												X
975	de Menthon M, Lambert M, Guiard E, Tognarelli S, Bienvenu B, Karras A, et al. Excessive Interleukin-15 Transpresentation Endows NKG2D+CD4+T Cells With Innate-like Capacity to Lyse Vascular Endothelium in Granulomatosis With Polyangiitis (Wegener's). Arthritis and Rheumatism 2011;63(7):2116-2126.	E	TA												X
976	de Mestral C, Dueck AD, Gomez D, Haas B, Nathens AB. Associated injuries, management, and outcomes of blunt abdominal aortic injury. Journal of Vascular Surgery 2012;56(3):656-660.	E	TA												X
977	de Mutsert R, Sun Q, Willett WC, Hu FB, van Dam RM. Overweight in early adulthood, adult weight change, and risk of type 2 diabetes, cardiovascular diseases, and certain cancers in men: a cohort study. Am J Epidemiol 2014;179(11):1353-65.	E	F												X	No childhood data. Baseline age 21; Exposure change overtime
978	De P, Otterstatter MC, Semenciw R, Ellison LF, Marrett LD, Dryer D. Trends in incidence, mortality, and survival for kidney cancer in Canada, 1986–2007. Cancer Causes and Control 2014;25(10):1271-1281.	E	TA												X
979	De Paepe B, Smet J, Leroy JG, Seneca S, George E, Matthys D, et al. Diagnostic value of immunostaining in cultured skin fibroblasts from patients with oxidative phosphorylation defects. Pediatric Research 2006;59(1):2-6.	E	TA												X
980	De Pergola G, Ciampolillo A, Paolotti S, Trerotoli P, Giorgino R. Free triiodothyronine and thyroid stimulating hormone are directly associated with waist circumference, independently of insulin resistance, metabolic parameters and blood pressure in overweight and obese women. Clin Endocrinol (Oxf) 2007;67(2):265-9.	E	TA												X
981	De Pergola G, Giorgino F, Benigno R, Guida P, Giorgino R. Independent influence of insulin, catecholamines, and thyroid hormones on metabolic syndrome. Obesity (Silver Spring) 2008;16(11):2405-11.	E	TA												X
982	De Pergola G, Nitti A, Bartolomeo N, Gesuita A, Giagulli VA, Triggiani V, et al. Possible role of hyperinsulinemia and insulin resistance in lower vitamin D levels in overweight and obese patients. Biomed Res Int 2013;2013:921348.	E	TA												X
983	De Rezende LFM, Lopes MR, Rey-Loṕez JP, Matsudo VKR, Luiz ODC. Sedentary behavior and health outcomes: An overview of systematic reviews. PLoS ONE 2014;9(8).	E	TA												X
984	De Simone M, Verrotti A, Cappa M, Iughetti L, Di Cesare E, Palumbo M, et al. Lipoprotein (a) in childhood: correlations with family history of cardiovascular disease. J Endocrinol Invest 2003;26(5):414-9.	E	TA												X
985	de Souza LJ, Souto Filho JT, de Souza TF, Reis AF, Gicovate Neto C, Bastos DA, et al. Prevalence of dyslipidemia and risk factors in Campos dos Goytacazes, in the Brazilian state of Rio de Janeiro. Arq Bras Cardiol 2003;81(3):249-64.	E	TA												X
986	De Vente W, Post GB, Twisk JWR, Kemper HCG, Van Mechelen W. Effects of health measurements and health information in youth and young adulthood in dietary intake - 20-y study results from the Amsterdam Growth and Health Longitudinal Study. European Journal of Clinical Nutrition 2001;55(10):819-823.	E	TA												X
987	de Vries PS, Gielen M, Rizopoulos D, Rump P, Godschalk R, Hornstra G, et al. Association between polyunsaturated fatty acid concentrations in maternal plasma phospholipids during pregnancy and offspring adiposity at age 7: the MEFAB cohort. Prostaglandins Leukot Essent Fatty Acids 2014;91(3):81-5.	E	TA												X
988	de Wilde JA, van Dommelen P, Middelkoop BJC. Appropriate Body Mass Index Cut-Offs to Determine Thinness, Overweight and Obesity in South Asian Children in The Netherlands. Plos One 2013;8(12).	E	TA												X
989	de Wit NJW, Ijssennagger N, Oosterink E, Keshtkar S, Hooiveld GJEJ, Mensink RP, et al. Oit1/Fam3D, a gut-secreted protein displaying nutritional status-dependent regulation. Journal of Nutritional Biochemistry 2012;23(11):1425-1433.	E	TA												X
990	Deal CL, Tony M, Hoÿbye C, Allen DB, Tauber M, Christiansen JS, et al. Growth hormone research society workshop summary: Consensus guidelines for recombinant human growth hormone therapy in Prader-Willi syndrome. Journal of Clinical Endocrinology and Metabolism 2013;98(6):E1072-E1087.	E	TA												X
991	Deardorff J, Fyfe M, Ekwaru JP, Kushi LH, Greenspan LC, Yen IH. Does neighborhood environment influence girls' pubertal onset? findings from a cohort study. BMC Pediatr 2012;12:27.	E	TA												X
992	DeBoer MD, Chen D, Burt DR, Ramirez-Zea M, Guerrant RL, Stein AD, et al. Early childhood diarrhea and cardiometabolic risk factors in adulthood: the Institute of Nutrition of Central America and Panama Nutritional Supplementation Longitudinal Study. Ann Epidemiol 2013;23(6):314-20.	E	TA												X
993	Deen ME, Ruurda LG, Wang J, Dekker GA. Risk factors for preeclampsia in multiparous women: primipaternity versus the birth interval hypothesis. J Matern Fetal Neonatal Med 2006;19(2):79-84.	E	TA												X
994	DeFina LF, Vega GL, Leonard D, Grundy SM. Fasting glucose, obesity, and metabolic syndrome as predictors of type 2 diabetes: the Cooper Center Longitudinal Study. J Investig Med 2012;60(8):1164-8.	E	TA												X
995	Dekkers C, Treiber FA, Kapuku G, van den Oord E, Snieder H. Growth of left ventricular mass in African American and European American youth. Hypertension 2002;39(5):943-951.	E	TA												X
996	Dekkers JC, Podolsky RH, Treiber FA, Barbeau P, Gutin B, Snieder H. Development of general and central obesity from childhood into early adulthood in African American and European American males and females with a family history of cardiovascular disease. Am J Clin Nutr 2004;79(4):661-8.	E	TA												X
997	Dekkers JC, Snieder H, Van Den Oord EJ, Treiber FA. Moderators of blood pressure development from childhood to adulthood: a 10-year longitudinal study. J Pediatr 2002;141(6):770-9.	E	F												X	Exposure change overtime
998	Dekkers JC, Treiber FA, Kapuku G, Snieder H. Differential influence of family history of hypertension and premature myocardial infarction on systolic blood pressure and left ventricular mass trajectories in youth. Pediatrics 2003;111(6 Pt 1):1387-93.	E	TA												X
999	DeLeon MM, Magliato KE, Roughneen PT, Graham L, Kudukis TM, DeLeon SY. Simultaneous repair of pectus excavatum and congenital heart disease. Annals of Thoracic Surgery 1997;64(2):557-559.	E	TA												X
1000	Delgado-Lista J, Garcia-Rios A, Perez-Martinez P, Solivera J, Yubero-Serrano EM, Fuentes F, et al. Interleukin 1B variant -1473G/C (rs1143623) influences triglyceride and interleukin 6 metabolism. Journal of Clinical Endocrinology and Metabolism 2011;96(5):E816-E820.	E	TA												X
1001	Delisle H, Agueh V, Fayomi B. Partnership research on nutrition transition and chronic diseases in West Africa - trends, outcomes and impacts. BMC Int Health Hum Rights 2011;11 Suppl 2:S10.	E	TA												X
1002	Delitala AP, Orrù M, Filigheddu F, Pilia MG, Delitala G, Ganau A, et al. Serum free thyroxine levels are positively associated with arterial stiffness in the SardiNIA study. Clinical Endocrinology 2015;82(4):592-597.	E	TA												X
1003	Dell'Agnolo CM, Carvalho MD, Pelloso SM. Pregnancy after bariatric surgery: implications for mother and newborn. Obes Surg 2011;21(6):699-706.	E	TA												X
1004	Dello Russo M, Ahrens W, De Vriendt T, Marild S, Molnar D, Moreno LA, et al. Gestational weight gain and adiposity, fat distribution, metabolic profile, and blood pressure in offspring: The IDEFICS project. International Journal of Obesity 2013;37(7):914-919.	E	TA												X
1005	DeLoach S, Keith SW, Gidding SS, Falkner B. Obesity associated inflammation in African American adolescents and adults. Am J Med Sci 2014;347(5):357-63.	E	TA												X
1006	Delvaux K, Philippaerts R, Lysens R, Vanhees L, Thomis M, Claessens AL, et al. Evaluation of the influence of cardiorespiratory fitness on diverse health risk factors, independent of waist circumference, in 40-year-old Flemish males. Obes Res 2000;8(8):553-8.	E	TA												X
1007	DeMarco MAM, Maynard JW, Huizinga MM, Baer AN, Köttgen A, Gelber AC, et al. Obesity and younger age at gout onset in a community-based cohort. Arthritis Care and Research 2011;63(8):1108-1114.	E	TA												X
1008	Demerath EW, Guan W, Grove ML, Aslibekyan S, Mendelson M, Zhou YH, et al. Epigenome-wide association study (EWAS) of BMI, BMI change and waist circumference in African American adults identifies multiple replicated loci. Hum Mol Genet 2015.	E	TA												X
1009	Demirci C, Ozkahya M, Demirci MS, Asci G, Kose T, Colak T, et al. Effects of three times weekly eight-hour nocturnal hemodialysis on volume and nutritional status. Am J Nephrol 2013;37(6):559-67.	E	TA												X
1010	Demirel A, Demirel OF, Emul M, Duran A, Ugur M. Relationships between IGF-1, schizophrenia, and treatment of metabolic syndrome. Comprehensive Psychiatry 2014;55(6):1391-1397.	E	TA												X
1011	Dempsey JC, Williams MA, Leisenring WM, Shy K, Luthy DA. Maternal birth weight in relation to plasma lipid concentrations in early pregnancy. Am J Obstet Gynecol 2004;190(5):1359-68.	E	TA												X
1012	Denburg MR, Pradhan M, Shults J, Jones A, Palmer JA, Baluarte HJ, et al. Longitudinal relations between obesity and hypertension following pediatric renal transplantation. Pediatr Nephrol 2010;25(10):2129-39.	E	TA												X	Special Pop
1013	Dencker M, Thorsson O, Karlsson MK, Linden C, Andersen LB, Wollmer P. Body fat, abdominal fat, and body fat distribution is related to left atrial diameter in young children. Obesity (Silver Spring) 2012;20(5):1104-8.	E	TA		X										X
1014	Dengel DR, Jacobs Jr DR, Steinberger J, Moran AM, Sinaiko AR. Gender differences in vascular function and insulin sensitivity in young adults. Clinical Science 2011;120(4):153-160.	E	TA												X
1015	Dennedy MC, Avalos G, O'Reilly MW, O'Sullivan EP, Dunne FP. The impact of maternal obesity on gestational outcomes. Ir Med J 2012;105(5 Suppl):23-5.	E	TA												X
1016	Dennedy MC, Avalos G, O'Reilly MW, O'Sullivan EP, Gaffney G, Dunne F. ATLANTIC-DIP: raised maternal body mass index (BMI) adversely affects maternal and fetal outcomes in glucose-tolerant women according to International Association of Diabetes and Pregnancy Study Groups (IADPSG) criteria. J Clin Endocrinol Metab 2012;97(4):E608-12.	E	TA												X
1017	Denti L, Pasolini G, Sanfelici L, Benedetti R, Cecchetti A, Ceda GP, et al. Aging-related decline of gonadal function in healthy men: correlation with body composition and lipoproteins. J Am Geriatr Soc 2000;48(1):51-8.	E	TA												X
1018	Denzer C, Karges B, Naeke A, Rosenbauer J, Schober E, Schwab KO, et al. Subclinical hypothyroidism and dyslipidemia in children and adolescents with type 1 diabetes mellitus. European Journal of Endocrinology 2013;168(4):601-608.	E	TA												X
1019	Derks M, Anzures-Cabrera J, Turnbull L, Phelan M. Safety, tolerability and pharmacokinetics of dalcetrapib following single and multiple ascending doses in healthy subjects: A randomized, double-blind, placebo-controlled, Phase i study. Clinical Drug Investigation 2011;31(5):325-335.	E	TA												X
1020	Derks M, Fowler S, Kuhlmann O. A single-center, open-label, one-sequence study of dalcetrapib coadministered with ketoconazole, and an in vitro study of the S-methyl metabolite of dalcetrapib. Clin Ther 2009;31(3):586-99.	E	TA												X
1021	Derks TGJ, Reijngoud DJ, Waterham HR, Gerver WJM, van den Berg MP, Sauer PJJ, et al. The natural history of medium-chain acyl CoA dehydrogenase deficiency in the Netherlands: Clinical presentation and outcome. Journal of Pediatrics 2006;148(5):665-670.	E	TA												X
1022	Desai MM, De Castro Abreu AL, Leslie S, Cai J, Huang EYH, Lewandowski PM, et al. Robotic partial nephrectomy with superselective versus main artery clamping: A retrospective comparison. European Urology 2014;66(4):713-719.	E	TA												X
1023	Desai PC, Deal AM, Brittain JE, Jones S, Hinderliter A, Ataga KI. Decades after the cooperative study: a re-examination of systemic blood pressure in sickle cell disease. Am J Hematol 2012;87(10):E65-8.	E	TA												X
1024	DeSanto Iennaco J, Cullen MR, Cantley L, Slade MD, Fiellin M, Kasl SV. Effects of externally rated job demand and control on depression diagnosis claims in an industrial cohort. Am J Epidemiol 2010;171(3):303-11.	E	TA												X
1025	Deshmukh-Taskar, P., et al. (2006). "Tracking of overweight status from childhood to young adulthood: the Bogalusa Heart Study." Eur J Clin Nutr 60(1): 48-57.	E	TA												X
1026	Desimone G, Devereux RB, Roman MJ, Schlussel Y, Alderman MH, Laragh JH. Echocardiographic Left-Ventricular Mass and Electrolyte Intake Predict Arterial-Hypertension. Annals of Internal Medicine 1991;114(3):202-209.	E	TA												X
1027	Desmeules A, Couillard C, Tchernof A, Bergeron J, Rankinen T, Leon AS, et al. Post-heparin lipolytic enzyme activities, sex hormones and sex hormone-binding globulin (SHBG) in men and women: The HERITAGE Family Study. Atherosclerosis 2003;171(2):343-50.	E	TA												X
1028	Detaille SI, Heerkens YF, Engels JA, van der Gulden JWJ, van Dijk FJH. Common prognostic factors of work disability among employees with a chronic somatic disease: a systematic review of cohort studies. Scandinavian Journal of Work Environment & Health 2009;35(4):261-281.	E	TA												X
1029	DeVader SR, Neeley HL, Myles TD, Leet TL. Evaluation of gestational weight gain guidelines for women with normal prepregnancy body mass index. Obstetrics and Gynecology 2007;110(4):745-751.	E	TA												X
1030	Devan AE, Eskurza I, Pierce GL, Walker AE, Jablonski KL, Kaplon RE, et al. Regular aerobic exercise protects against impaired fasting plasma glucose-associated vascular endothelial dysfunction with aging. Clinical Science 2013;124(5):325-331.	E	TA												X
1031	Devereux G. Session 1: Allergic disease - Nutrition as a potential determinant of asthma. Proceedings of the Nutrition Society 2010;69(1):1-10.	E	TA												X
1032	Devereux RB, de Simone G, Koren MJ, Roman MJ, Laragh JH. Left ventricular mass as a predictor of development of hypertension. Am J Hypertens 1991;4(11):603S-607S.	E	TA												X
1033	Devi K, Malleshappa K, Jeyalakshmi L. Association of acylation stimulating protein with endogenous sex hormones & lipid profile during menstrual cycle. Indian J Physiol Pharmacol 2012;56(2):147-53.	E	TA												X
1034	DeVore S, Kohli R, Lake K, Nicholas L, Dietrich K, Balistreri WF, et al. A multidisciplinary clinical program is effective in stabilizing BMI and reducing transaminase levels in pediatric patients with NAFLD. J Pediatr Gastroenterol Nutr 2013;57(1):119-23.	E	TA												X
1035	Deya-Martinez A, Noguera-Julian A, Vila J, Vila A, Valls A, Sanchez E, et al. The role of albuminuria in the follow-up of HIV-infected pediatric patients. Pediatr Nephrol 2014;29(9):1561-6.	E	TA												X
1036	Dhawale AA, Gjolaj JP, Holmes L, Jr., Sands LR, Temple HT, Eismont FJ. Sacrectomy and Adjuvant Radiotherapy for the Treatment of Sacral Chordomas. Spine 2014;39(5):E353-E359.	E	TA												X
1037	Dhingra R, Sullivan L, Jacques PF, Wang TJ, Fox CS, Meigs JB, et al. Soft drink consumption and risk of developing cardiometabolic risk factors and the metabolic syndrome in middle-aged adults in the community. Circulation 2007;116(5):480-8.	E	TA												X
1038	Di Biagio A, Rosso R, Maggi P, Mazzei D, Bernardini C, Nulvesu L, et al. Inflammation markers correlate with common carotid intima-media thickness in patients perinatally infected with human immunodeficiency virus 1. J Ultrasound Med 2013;32(5):763-8.	E	TA												X
1039	Di Bonito P, Forziato C, Sanguigno E, Di Fraia T, Saitta F, Iardino MR, et al. Prevalence of the metabolic syndrome using ATP-derived definitions and its relation to insulin-resistance in a cohort of Italian outpatient children. Journal of Endocrinological Investigation 2010;33(11):806-809.	E	TA												X
1040	Di Bonito P, Valerio G, Grugni G, Licenziati MR, Maffeis C, Manco M, et al. Comparison of non-HDL-cholesterol versus triglycerides-to-HDL-cholesterol ratio in relation to cardiometabolic risk factors and preclinical organ damage in overweight/obese children: The CARITALY study. Nutrition, Metabolism and Cardiovascular Diseases 2015;25(5):489-494.	E	TA		X										X
1041	Di Carli MF, Charytan D, McMahon GT, Ganz P, Dorbala S, Schelbert HR. Coronary circulatory function in patients with the metabolic syndrome. J Nucl Med 2011;52(9):1369-77.	E	TA												X
1042	Di Iorgi N, Mittelman SD, Gilsanz V. Differential effect of marrow adiposity and visceral and subcutaneous fat on cardiovascular risk in young, healthy adults. Int J Obes (Lond) 2008;32(12):1854-60.	E	TA		X										X
1043	di Iorgi N, Secco A, Napoli F, Tinelli C, Calcagno A, Fratangeli N, et al. Deterioration of growth hormone (GH) response and anterior pituitary function in young adults with childhood-onset GH deficiency and ectopic posterior pituitary: a two-year prospective follow-up study. J Clin Endocrinol Metab 2007;92(10):3875-84.	E	TA												X
1044	Di Minno G, Mannucci PM, Tufano A, Palareti G, Moia M, Baccaglini U, et al. The first ambulatory screening on thromboembolism: A multicentre, cross-sectional, observational study on risk factors for venous thromboembolism. Journal of Thrombosis and Haemostasis 2005;3(7):1459-1466.	E	TA												X
1045	Di Somma C, Pivonello R, Pizza G, De Rosa A, Lombardi G, Colao A, et al. Prevalence of the metabolic syndrome in moderately-severely obese subjects with and without growth hormone deficiency. Journal of Endocrinological Investigation 2010;33(3):171-177.	E	TA												X
1046	Diamond JM, Lee JC, Kawut SM, Shah RJ, Localio AR, Bellamy SL, et al. Clinical risk factors for primary graft dysfunction after lung transplantation. Am J Respir Crit Care Med 2013;187(5):527-34.	E	TA												X
1047	Diaz Beloso RM. [Nutritional and metabolic pattern]. Rev Enferm 2010;33(12):56-64.	E	TA												X
1048	Diaz-Castro L, Cabello-Rangel H, Cuevas-Pineda GJ, Reza-Garduno H, Castaneda-Gonzalez CJ. Prevalence of the metabolic syndrome in a psychiatric hospital in Mexico. Actas Esp Psiquiatr 2011;39(2):115-22.	E	TA												X
1049	Dierkes F, Andriopoulos N, Sucker C, Kuhr K, Hollenbeck M, Hetzel GR, et al. Indicators of Acute and Persistent Renal Damage in Adult Thrombotic Microangiopathy. Plos One 2012;7(1).	E	TA												X
1050	Dietz WH. Therapeutic strategies in childhood obesity. Horm Res 1993;39 Suppl 3:86-90.	E	TA												X
1051	DiGiorgi M, Daud A, Inabnet WB, Schrope B, Urban-Skuro M, Restuccia N, et al. Markers of bone and calcium metabolism following gastric bypass and laparoscopic adjustable gastric banding. Obes Surg 2008;18(9):1144-8.	E	TA												X
1052	Dik VK, Peters MJ, Dijkmans PA, Van der Weijden MA, De Vries MK, Dijkmans BA, et al. The relationship between disease-related characteristics and conduction disturbances in ankylosing spondylitis. Scand J Rheumatol 2010;39(1):38-41.	E	TA												X
1053	Dimock D, Thomas V, Cushing A, Purdy JB, Worrell C, Kopp JB, et al. Longitudinal assessment of metabolic abnormalities in adolescents and young adults with HIV-infection acquired perinatally or in early childhood. Metabolism 2011;60(6):874-80.	E	TA												X
1054	Ding WQ, Yan YK, Zhang MX, Cheng H, Zhao XY, Hou DQ, et al. Hypertension outcomes in metabolically unhealthy normal-weight and metabolically healthy obese children and adolescents. J Hum Hypertens 2015.	E	F												X	no adult data
1055	Dion JM, McKee C, Tobias JD, Sohner P, Herz D, Teich S, et al. Ventilation during laparoscopic-assisted bariatric surgery: volume-controlled, pressure-controlled or volume-guaranteed pressure-regulated modes. International Journal of Clinical and Experimental Medicine 2014;7(8):2242-2247.	E	TA												X
1056	Dior UP, Lawrence GM, Sitlani C, Enquobahrie D, Manor O, Siscovick DS, et al. Parental smoking during pregnancy and offspring cardio-metabolic risk factors at ages 17 and 32. Atherosclerosis 2014;235(2):430-7.	E	F												X	No association between childhood adiposity and adult cvd. The regression model did not have the child's BMI
1057	Diouf I, Botton J, Charles MA, Morel O, Forhan A, Kaminski M, et al. Specific role of maternal weight change in the first trimester of pregnancy on birth size. Maternal and Child Nutrition 2014;10(3):315-326.	E	TA												X
1058	Diouf I, Charles MA, Thiebaugeorges O, Forhan A, Kaminski M, Heude B. Maternal weight change before pregnancy in relation to birthweight and risks of adverse pregnancy outcomes. Eur J Epidemiol 2011;26(10):789-96.	E	TA												X
1059	DiPietro L, Mossberg HO, Stunkard AJ. A 40-year history of overweight children in Stockholm: life-time overweight, morbidity, and mortality. Int J Obes Relat Metab Disord 1994;18(9):585-90.	E	TA												X
1060	Disabella E, Grasso M, Gambarin FI, Narula N, Dore R, Favalli V, et al. Risk of dissection in thoracic aneurysms associated with mutations of smooth muscle alpha-actin 2 (ACTA2). Heart 2011;97(4):321-326.	E	TA												X
1061	Divasta AD, Feldman HA, Brown JN, Giancaterino C, Holick MF, Gordon CM. Bioavailability of vitamin D in malnourished adolescents with anorexia nervosa. J Clin Endocrinol Metab 2011;96(8):2575-80.	E	TA												X
1062	DiVasta AD, Walls CE, Feldman HA, Quach AE, Woods ER, Gordon CM, et al. Malnutrition and hemodynamic status in adolescents hospitalized for anorexia nervosa. Arch Pediatr Adolesc Med 2010;164(8):706-13.	E	TA												X
1063	Dixon JB, Chuang L-M, Chong K, Chen S-C, Lambert GW, Straznicky NE, et al. Predicting the Glycemic Response to Gastric Bypass Surgery in Patients With Type 2 Diabetes. Diabetes Care 2013;36(1):20-26.	E	TA												X
1064	Dixon JB, Dixon ME, O'Brien PE. Birth outcomes in obese women after laparoscopic adjustable gastric banding. Obstetrics and Gynecology 2005;106(5 I):965-972.	E	TA												X
1065	Dixon JB, O'Brien P. A disparity between conventional lipid and insulin resistance markers at body mass index levels greater than 34 kg/m2. International Journal of Obesity 2001;25(6):793-797.	E	TA												X
1066	Dixon LB, Pellizzon MA, Jawad AF, Tershakovec AM. Calcium and dairy intake and measures of obesity in hyper- and normocholesterolemic children. Obes Res 2005;13(10):1727-38.	E	TA												X
1067	Djukanovic L, Lezaic V, Blagojevic R, Radivojevic D, Stosovic M, Jovanovic N, et al. Co-morbidity and kidney graft failure-two main causes of malnutrition in kidney transplant patients. Nephrol Dial Transplant 2003;18 Suppl 5:v68-70.	E	TA												X
1068	Do Carmo I, Dos Santos O, Camolas J, Vieira J, Carreira M, Medina L, et al. Overweight and obesity in Portugal: National prevalence in 2003-2005. Obesity Reviews 2008;9(1):11-19.	E	TA												X
1069	Do Rego AT, Klop B, Birnie E, Elte JWF, Cachofeiro Ramos V, Walther Alvarez-Sala LA, et al. Diurnal triglyceridemia in relation to alcohol intake in men. Nutrients 2013;5(12):5114-5126.	E	TA												X
1070	Dobiasova M, Raslova K, Rauchova H, Vohnout B, Ptackova K, Frohlich J. Atherogenic lipoprotein profile in families with and without history of early myocardial infarction. Physiol Res 2001;50(1):1-8.	E	TA												X
1071	Doherty DA, Magann EF, Chauhan SP, O'Boyle AL, Busch JM, Morrison JC. Factors affecting caesarean operative time and the effect of operative time on pregnancy outcomes. Aust N Z J Obstet Gynaecol 2008;48(3):286-91.	E	TA												X
1072	Dokras A. Cardiovascular disease risk in women with PCOS. Steroids 2013;78(8):773-6.	E	TA												X
1073	Dolcetti A, Silversides CK, Marshall CR, Lionel AC, Stavropoulos DJ, Scherer SW, et al. 1q21.1 Microduplication expression in adults. Genetics in Medicine 2013;15(4):282-289.	E	TA												X
1074	Dolezalova P, Young SP, Bacon PA, Southwood TR. Nailfold capillary microscopy in healthy children and in childhood rheumatic diseases: a prospective single blind observational study. Annals of the Rheumatic Diseases 2003;62(5):444-449.	E	TA												X
1075	Dolinsky DH, Armstrong SC, Walter EB, Kemper AR. The effectiveness of a primary care-based pediatric obesity program. Clin Pediatr (Phila) 2012;51(4):345-53.	E	TA												X
1076	Dominguez F, Beekley AC, Huffer LL, Gentlesk PJ, Eckart RE. High-velocity penetrating thoracic trauma with suspected cardiac involvement in a combat support hospital. Gen Thorac Cardiovasc Surg 2011;59(8):547-52.	E	TA												X
1077	Donahue RP, Prineas RJ, Gomez O, Hong CP. Familial resemblance of body fat distribution: the Minneapolis Children's Blood Pressure Study. Int J Obes Relat Metab Disord 1992;16(3):161-7.	E	TA												X
1078	Donahue SMA, Rifas-Shiman SL, Gold DR, Jouni ZE, Gillman MW, Oken E. Prenatal fatty acid status and child adiposity at age 3 y: Results from a US pregnancy cohort. American Journal of Clinical Nutrition 2011;93(4):780-788.	E	TA												X
1079	Dong L, He JG, Shan GL, Lu XL, Zeng WJ, Liu ZH, et al. [Clinical analysis of 150 patients with idiopathic pulmonary arterial hypertension]. Zhonghua Xin Xue Guan Bing Za Zhi 2012;40(8):657-61.	E	TA												X
1080	Dong M, Giles WH, Felitti VJ, Dube SR, Williams JE, Chapman DP, et al. Insights into causal pathways for ischemic heart disease: adverse childhood experiences study. Circulation 2004;110(13):1761-6.	E	TA												X
1081	Donini LM, Cuzzolaro M, Gnessi L, Lubrano C, Migliaccio S, Aversa A, et al. Obesity treatment: results after 4 years of a Nutritional and Psycho-Physical Rehabilitation Program in an outpatient setting. Eat Weight Disord 2014;19(2):249-60.	E	TA												X
1082	Donkor J, Sparks LM, Xie H, Smith SR, Reue K. Adipose tissue lipin-1 expression is correlated with peroxisome proliferator-activated receptor alpha gene expression and insulin sensitivity in healthy young men. J Clin Endocrinol Metab 2008;93(1):233-9.	E	TA												X
1083	Donnelly JE, Sullivan DK, Smith BK, Jacobsen DJ, Washburn RA, Johnson SL, et al. Alteration of dietary fat intake to prevent weight gain: Jayhawk Observed Eating Trial. Obesity (Silver Spring) 2008;16(1):107-12.	E	TA												X
1084	Dontje ML, de Greef MHG, Krijnen WP, Corpeleijn E, Kok T, Bakker SJL, et al. Longitudinal measurement of physical activity following kidney transplantation. Clinical Transplantation 2014;28(4):394-402.	E	TA												X
1085	Dorchy H, Roggemans MP, Willems D. Glycated hemoglobin and related factors in diabetic children and adolescents under 18 years of age: A Belgian experience. Diabetes Care 1997;20(1):2-6.	E	TA												X
1086	Dores H, Santos P, Salvador F, Maia J, Paixao L, Pereira R, et al. Blood pressure in young adults. Rev Port Cardiol 2010;29(10):1495-508.	E	TA												X
1087	Dorgan JF, Liu L, Barton BA, Deshmukh S, Snetselaar LG, Van Horn L, et al. Adolescent diet and metabolic syndrome in young women: results of the Dietary Intervention Study in Children (DISC) follow-up study. J Clin Endocrinol Metab 2011;96(12):E1999-2008.	E	TA												X
1088	Dorgan JF, McMahon RP, Aronson L, Van Horn FL, Snetselaar LG, Kwiterovich PO, Jr., et al. Diet and sex hormones in boys: Findings from the dietary intervention study in children. Journal of Clinical Endocrinology & Metabolism 2006;91(10):3992-3996.	E	TA												X
1089	Doshi N, Perrin EM, Lazorick S, Esserman D, Steiner MJ. Short-term change in body mass index in overweight adolescents following cholesterol screening. Archives of Pediatrics and Adolescent Medicine 2009;163(9):812-817.	E	TA												X
1090	Doyon A, Kracht D, Bayazit AK, Deveci M, Duzova A, Krmar RT, et al. Carotid Artery Intima-Media Thickness and Distensibility in Children and Adolescents: Reference Values and Role of Body Dimensions. Hypertension 2013;62(3):550-556.	E	F												X
1091	Drago G, Comisi F, Termini C. [The validity of screening for hypertension in school-age children. A cross-sectional study of a sample of 861 pupils of the towns of Local Health Unit No. 22 of Vittoria (Sicily)]. Pediatr Med Chir 1994;16(4):363-7.	E	TA		X										X
1092	Draper N, Echwald SM, Lavery GG, Walker EA, Fraser R, Davies E, et al. Association studies between microsatellite markers within the gene encoding human 11beta-hydroxysteroid dehydrogenase type 1 and body mass index, waist to hip ratio, and glucocorticoid metabolism. J Clin Endocrinol Metab 2002;87(11):4984-90.	E	TA												X
1093	Dratva J, Probst-Hensch N, Schmidt-Trucksäss A, Caviezel S, de Groot E, Bettschart R, et al. Atherogenesis in youth - Early consequence of adolescent smoking. Atherosclerosis 2013;230(2):304-309.	E	TA												X
1094	Driver DI, Gogtay N, Rapoport JL. Childhood Onset Schizophrenia and Early Onset Schizophrenia Spectrum Disorders. Child and Adolescent Psychiatric Clinics of North America 2013;22(4):539-555.	E	TA												X
1095	Drouillet P, Forhan A, De Lauzon-Guillain B, Thiebaugeorges O, Goua V, Magnin G, et al. Maternal fatty acid intake and fetal growth: evidence for an association in overweight women. The 'EDEN mother-child' cohort (study of pre- and early postnatal determinants of the child's development and health). British Journal of Nutrition 2009;101(4):583-591.	E	TA												X
1096	Drouillet P, Kaminski M, De Lauzon-Guillain B, Forhan A, Ducimetiere P, Schweitzer M, et al. Association between maternal seafood consumption before pregnancy and fetal growth: evidence for an association in overweight women. The EDEN mother-child cohort. Paediatr Perinat Epidemiol 2009;23(1):76-86.	E	TA												X
1097	Du X, Zhu B, Hu G, Mao W, Wang S, Zhang H, et al. U-shape association between white blood cell count and the risk of diabetes in young Chinese adults. Diabetic Medicine 2009;26(10):955-960.	E	TA												X
1098	Dubern B, Aggoun Y, Boule M, Fauroux B, Bonnet D, Tounian P. Arterial alterations in severely obese children with obstructive sleep apnoea. Int J Pediatr Obes 2010;5(3):230-6.	E	TA												X
1099	Dubey S, Kabra M, Bajpai A, Pandey RM, Hasan M, Gautam RK, et al. Serum leptin levels in obese Indian children: Relation to clinical and biochemical parameters. Indian Pediatrics 2007;44(4):257-262.	E	TA												X
1100	Ducarme G, Rodrigues A, Aissaoui F, Davitian C, Pharisien I, Uzan M. [Pregnancy in obese patients: which risks is it necessary to fear?]. Gynecol Obstet Fertil 2007;35(1):19-24.	E	TA												X
1101	Ducher M, Fauvel JP, Cerutti C. [Risk profiles of hypertension in normotensive subjects]. Arch Mal Coeur Vaiss 2003;96(7-8):754-7.	E	TA												X
1102	Ducorps M, Bauduceau B, Mayaudon H, Sonnet E, Groussin L, Castagne C. [Prevalence of hypertension in a black African diabetic population]. Arch Mal Coeur Vaiss 1996;89(8):1069-73.	E	TA												X
1103	Dudding T, Heron J, Thakkinstian A, Nurk E, Golding J, Pembrey M, et al. Factor V Leiden is associated with pre-eclampsia but not with fetal growth restriction: A genetic association study and meta-analysis. Journal of Thrombosis and Haemostasis 2008;6(11):1868-1875.	E	TA												X
1104	Duffey KJ, Gordon-Larsen P, Steffen LM, Jacobs DR, Jr., Popkin BM. Drinking caloric beverages increases the risk of adverse cardiometabolic outcomes in the Coronary Artery Risk Development in Young Adults (CARDIA) Study. American Journal of Clinical Nutrition 2010;92(4):954-959.	E	TA												X
1105	Duggan A, Huffman FG. Validation of serum transthyretin (prealbumin) as a nutritional parameter in hemodialysis patients. J Ren Nutr 1998;8(3):142-9.	E	TA												X
1106	Dulloo AG, Jacquet J, Seydoux J, Montani JP. The thrifty 'catch-up fat' phenotype: Its impact on insulin sensitivity during growth trajectories to obesity and metabolic syndrome. International Journal of Obesity 2006;30(SUPPL. 4):S23-S35.	E	TA												X
1107	Duncan AF, Heyne RJ, Morgan JS, Ahmad N, Rosenfeld CR. Elevated systolic blood pressure in preterm very-low-birth-weight infants ≤3 years of life. Pediatric Nephrology 2011;26(7):1115-1121.	E	TA												X
1108	Duncan MJ, Martins C, Silva G, Ribeiro JC, Oliveira J, Pizarro A, et al. Examining the Utility of Thresholds for Aerobic Fitness Related to Resting Blood Pressure and BMI in Portuguese Children. American Journal of Human Biology 2015;27(2):226-227.	E	TA												X
1109	Dunder T, Kuikka L, Turtinen J, Räsänen L, Uhari M. Diet, serum fatty acids, and atopic diseases in childhood. Allergy: European Journal of Allergy and Clinical Immunology 2001;56(5):425-428.	E	TA												X
1110	Durand G, Tsismenakis AJ, Jahnke SA, Baur DM, Christophi CA, Kales SN. Firefighters' Physical Activity: Relation to Fitness and Cardiovascular Disease Risk. Medicine and Science in Sports and Exercise 2011;43(9):1752-1759.	E	TA												X
1111	Duzova A, Yalcinkaya F, Baskin E, Bakkaloglu A, Soylemezoglu O. Prevalence of hypertension and decreased glomerular filtration rate in obese children: results of a population-based field study. Nephrol Dial Transplant 2013;28 Suppl 4:iv166-71.	E	TA												X
1112	Dwyer JT, Gardner J, Halvorsen K, Krall EA, Cohen A, Valadian I. Memory of Food-Intake in the Distant Past. American Journal of Epidemiology 1989;130(5):1033-1046.	E	TA												X
1113	Dwyer T, Blizzard L, Venn A, Stankovich JM, Ponsonby AL, Morley R. Syndrome X in 8-y-old Australian children: stronger associations with current body fatness than with infant size or growth. Int J Obes Relat Metab Disord 2002;26(10):1301-9.	E	TA												X	FU-birth to 8 years
1114	Dwyer T, Magnussen CG, Schmidt MD, Ukoumunne OC, Ponsonby AL, Raitakari OT, et al. Decline in physical fitness from childhood to adulthood associated with increased obesity and insulin resistance in adults. Diabetes Care 2009;32(4):683-7.	E	TA												X
1115	Dwyer T, Sun C, Magnussen CG, Raitakari OT, Schork NJ, Venn A, et al. Cohort Profile: the international childhood cardiovascular cohort (i3C) consortium. Int J Epidemiol 2013;42(1):86-96.	E	F	Meta-Analysis
1116	Dyer AR, Stamler J, Garside DB, Greenland P. Long-term consequences of body mass index for cardiovascular mortality: The Chicago heart association detection project in industry study. Annals of Epidemiology 2004;14(2):101-108.	E	F												X	study population: 18 years or older
1117	Eaker ED, Sullivan LM, Kelly-Hayes M, D'Agostino RB, Sr., Benjamin EJ. Does job strain increase the risk for coronary heart disease or death in men and women? The Framingham Offspring Study. Am J Epidemiol 2004;159(10):950-8.	E	TA												X
1118	Eaker ED, Sullivan LM, Kelly-Hayes M, D'Agostino Sr RB, Benjamin EJ. Marital status, marital strain, and risk of coronary heart disease or total mortality: The Framingham Offspring Study. Psychosomatic Medicine 2007;69(6):509-513.	E	TA												X
1119	Ebbeling CB, Leidig MM, Feldman HA, Lovesky MM, Ludwig DS. Effects of a low-glycemic load vs low-fat diet in obese young adults: a randomized trial. JAMA 2007;297(19):2092-102.	E	TA												X
1120	Echenique Sarah J, Rodriguez Osiac L, Pizarro Quevedo T, Martin MA, Atalah Samur E. [Impact of a national treatment program in overweight adults women in primary care centers]. Nutr Hosp 2011;26(6):1372-7.	E	TA												X
1121	Eck LH, Klesges RC, Hanson CL, Slawson D. Children at familial risk for obesity: an examination of dietary intake, physical activity and weight status. Int J Obes Relat Metab Disord 1992;16(2):71-8.	E	TA												X
1122	Eck LH, Pascale RW, Klesges RC, Ray JAW, Klesges LM. Predictors of Waist Circumference Change in Healthy-Young Adults. International Journal of Obesity 1995;19(11):765-769.	E	TA												X
1123	Eckard AR, Tangpricha V, Seydafkan S, O'Riordan MA, Storer N, Labbato D, et al. The relationship between vitamin D status and HIV-related complications in HIV-infected children and young adults. Pediatr Infect Dis J 2013;32(11):1224-9.	E	TA												X
1124	Eckel RH, York DA, Rössner S, Van H, Caterson I, St. Jeor ST, et al. Prevention conference VII: Obesity, a worldwide epidemic related to heart disease and stroke executive summary. Circulation 2004;110(18):2968-2975.	E	TA									Conference Proceeding
1125	Edinger C, Song J, Robbins K. Acanthosis nigricans in hawaiian children vs non-hawaiian children. Ethnicity and Disease 2008;18(2 SUPPL. 1):S126-S127.	E	TA												X
1126	Edlinger M, Strohmaier S, Jonsson H, Bjørge T, Manjer J, Borena WT, et al. Blood pressure and other metabolic syndrome factors and risk of brain tumour in the large population-based Me-Can cohort study. Journal of Hypertension 2012;30(2):290-296.	E	TA												X
1127	Edmundsson D, Svensson O, Toolanen G. Intermittent claudication in diabetes mellitus due to chronic exertional compartment syndrome of the leg - An observational study of 17 patients. Acta Orthopaedica 2008;79(4):534-539.	E	TA												X
1128	Ehrenthal DB, Maiden K, Rao A, West DW, Gidding SS, Bartoshesky L, et al. Independent relation of maternal prenatal factors to early childhood obesity in the offspring. Obstet Gynecol 2013;121(1):115-21.	E	TA												X
1129	Ehrlich SF, Rosas LG, Ferrara A, King JC, Abrams B, Harley KG, et al. Pregnancy glucose levels in women without diabetes or gestational diabetes and childhood cardiometabolic risk at 7 years of age. Journal of Pediatrics 2012;161(6):1016-1021.	E	TA												X
1130	Eichhorn V, Maerz A, Salomon G, Blanc IF, Reuter DA, Goetz AE. Hemodynamic effects of orally administered delta-ALA during radical prostatectomy. World Journal of Urology 2013;31(2):371-376.	E	TA												X
1131	Eide MG, Skaerven R, Irgens LM, Bjerkedal T, Oyen N. Associations of birth defects with adult intellectual performance, disability and mortality: Population-based cohort study. Pediatric Research 2006;59(6):848-853.	E	TA												X
1132	Eilat-Adar S, Goldbourt U. Nutritional recommendations for preventing coronary heart disease in women: evidence concerning whole foods and supplements. Nutr Metab Cardiovasc Dis 2010;20(6):459-66.	E	TA												X
1133	Einecke D. [Elderly patients in the family doctor's office. Almost every patient has more than one risk factor]. MMW Fortschr Med 2005;147(45):43-4, 46.	E	TA												X
1134	Eisenmann JC. Physical activity and cardiovascular disease risk factors in children and adolescents: an overview. Can J Cardiol 2004;20(3):295-301.	E	TA												X
1135	Eisenmann JC, Welk GJ, Wickel EE, Blair SN. Stability of variables associated with the metabolic syndrome from adolescence to adulthood: the Aerobics Center Longitudinal Study. Am J Hum Biol 2004;16(6):690-6.	E	F												X	change overtime
1136	Eisenmann JC, Welk GJ, Wickel EE, Blair SN. Combined influence of cardiorespiratory fitness and body mass index on cardiovascular disease risk factors among 8-18 year old youth: The Aerobics Center Longitudinal Study. International Journal of Pediatric Obesity 2007;2(2):66-72.	E	TA												X	Age: 8 to 18
1138	Eisenring CV, Neidert MC, Bove DS, Held L, Sarnthein J, Krayenbuhl N. Reduction of Thromboembolic Events in Meningioma Surgery: A Cohort Study of 724 Consecutive Patients. Plos One 2013;8(11).	E	TA												X
1139	Eissa MA, Wen E, Mihalopoulos NL, Grunbaum JA, Labarthe DR. Evaluation of AAP Guidelines for Cholesterol Screening in Youth. Project HeartBeat! American Journal of Preventive Medicine 2009;37(1 SUPPL.):S71-S77.	E	TA												X
1140	Ekelund U, Ong KK, Linne Y, Neovius M, Brage S, Dunger DB, et al. Association of weight gain in infancy and early childhood with metabolic risk in young adults. J Clin Endocrinol Metab 2007;92(1):98-103.	E	TA												X	FU: Birth to 17 years
1141	El Rahman MA, Haase D, Rentzsch A, Olchvary J, Schaefers H-J, Henn W, et al. Left Ventricular Systolic Dysfunction in Asymptomatic Marfan Syndrome Patients Is Related to the Severity of Gene Mutation: Insights from the Novel Three Dimensional Speckle Tracking Echocardiography. Plos One 2015;10(4).	E	TA												X
1142	El-Gilany A-H, Hammad S. Body mass index and obstetric outcomes in Saudi Arabia: a prospective cohort study. Annals of Saudi Medicine 2010;30(5):376-380.	E	TA												X
1143	El-Sayed Moustafa JS, Eleftherohorinou H, de Smith AJ, Andersson-Assarsson JC, Alves AC, Hadjigeorgiou E, et al. Novel association approach for variable number tandem repeats (VNTRs) identifies DOCK5 as a susceptibility gene for severe obesity. Hum Mol Genet 2012;21(16):3727-38.	E	TA												X
1144	Elabbassi WN, Haddad HA. The epidemic of the metabolic syndrome. Saudi Med J 2005;26(3):373-5.	E	TA												X
1145	Eldar-Geva T, Srebnik N, Altarescu G, Varshaver I, Brooks B, Levy-Lahad E, et al. Neonatal outcome after preimplantation genetic diagnosis. Fertility and Sterility 2014;102(4):1016-1021.	E	TA												X
1146	Elisaf M, Papanikolaou N, Letzaris G, Siamopoulos KC. Smoking habit in female students of northwestern Greece: Relation to other cardiovascular risk factors. Journal of the Royal Society of Health 1996;116(2):87-90.	E	TA												X
1147	Elizabeth KE, Krishnan V, Zachariah P. Auxologic, biochemical and clinical (ABC) profile of low birth weight babies- a 2-year prospective study. J Trop Pediatr 2007;53(6):374-82.	E	TA												X
1148	Elliott JM, O'Leary S, Sterling M, Hendrikz J, Pedler A, Jull G. Magnetic resonance imaging findings of fatty infiltrate in the cervical flexors in chronic whiplash. Spine 2010;35(9):948-954.	E	TA												X
1149	Elliott MA, Letendre L, Tefferi A, Hogan WJ, Hook C, Kaufmann SH, et al. Therapy-related acute promyelocytic leukemia: observations relating to APL pathogenesis and therapy. Eur J Haematol 2012;88(3):237-43.	E	TA												X
1150	Ellis JA, Ponsonby A-L, Pezic A, Williamson E, Cochrane JA, Dickinson JL, et al. APOE Genotype and Cardio-Respiratory Fitness Interact to Determine Adiposity in 8-Year-Old Children from the Tasmanian Infant Health Survey. Plos One 2011;6(11).	E	TA												X
1151	Ellis KJ, Grund B, Visnegarwala F, Thackeray L, Miller CG, Chesson CE, et al. Visceral and subcutaneous adiposity measurements in adults: influence of measurement site. Obesity (Silver Spring) 2007;15(6):1441-7.	E	TA												X
1152	Elloumi H, Hefaiedh R, Gargouri D, Chedly-Debbiche A, Khayat O, Bel Hadj N, et al. Hepatic steatosis in chronic hepatitis B: contributing factors and effect on fibrosis. Tunis Med 2008;86(11):1000-3.	E	TA												X
1153	Ellsworth DL, Coady SA, Chen W, Srinivasan SR, Boerwinkle E, Berenson GS. Interactive effects between polymorphisms in the beta-adrenergic receptors and longitudinal changes in obesity. Obes Res 2005;13(3):519-26.	E	TA												X
1154	Ellsworth DL, Coady SA, Chen W, Srinivasan SR, Elkasabany A, Gustat J, et al. Influence of the beta2-adrenergic receptor Arg16Gly polymorphism on longitudinal changes in obesity from childhood through young adulthood in a biracial cohort: the Bogalusa Heart Study. Int J Obes Relat Metab Disord 2002;26(7):928-37.	E	TA												X
1155	Elovainio M, Ferrie JE, Singh-Manoux A, Shipley M, Batty GD, Head J, et al. Socioeconomic differences in cardiometabolic factors: Social causation or health-related selection? Evidence from the whitehall II cohort study, 1991-2004. American Journal of Epidemiology 2011;174(7):779-789.	E	TA												X
1156	Elstgeest LEM, Mishra GD, Dobson AJ. Transitions in living arrangements are associated with changes in dietary patterns in young women. Journal of Nutrition 2012;142(8):1561-1567.	E	TA												X
1157	Elwood PC, Givens DI, Beswick AD, Fehily AM, Pickering JE, Gallacher J. The Survival Advantage of Milk and Dairy Consumption: an Overview of Evidence from Cohort Studies of Vascular Diseases, Diabetes and Cancer. Journal of the American College of Nutrition 2008;27(6):723S-734S.	E	TA												X
1158	Elzik ME, Dirschl DR, Dahners LE. Hemorrhage in pelvic fractures does not correlate with fracture length. Journal of Trauma-Injury Infection and Critical Care 2008;65(2):436-441.	E	TA												X
1159	Emma F, Sesto A, Rizzoni G. Long-term linear growth of children with severe steroid-responsive nephrotic syndrome. Pediatric Nephrology 2003;18(8):783-788.	E	TA												X
1160	Eng DS, Lee JM, Gebremariam A, Meeker JD, Peterson K, Padmanabhan V. Bisphenol A and chronic disease risk factors in US children. Pediatrics 2013;132(3):e637-e645.	E	TA												X
1161	Enger C, Gately R, Ming EE, Niemcryk SJ, Williams L, McAfee AT. Pharmacoepidemiology Safety Study of Fibrate and Statin Concomitant Therapy. American Journal of Cardiology 2010;106(11):1594-1601.	E	TA												X
1162	Enright PL, Goodwin JL, Sherrill DL, Quan JR, Quan SF. Blood pressure elevation associated with sleep-related breathing disorder in a community sample of white and Hispanic children: the Tucson Children's Assessment of Sleep Apnea study. Arch Pediatr Adolesc Med 2003;157(9):901-4.	E	TA												X
1163	Ensenauer R, Gmach J, Nehring I, Von Kries R. Increased hemoglobin A1c in obese pregnant women after exclusion of gestational diabetes. Clinical Chemistry 2012;58(7):1152-1154.	E	TA												X
1164	Epstein LH, Gordy CC, Raynor HA, Beddome M, Kilanowski CK, Paluch R. Increasing fruit and vegetable intake and decreasing fat and sugar intake in families at risk for childhood obesity. Obes Res 2001;9(3):171-8.	E	TA												X
1165	Erasmus RT, Sinha AK, Nathaniel K. Serum lipid concentrations in the Koki community: a preliminary report. P N G Med J 1993;36(4):306-10.	E	TA												X
1166	Erbey JR, Robbins D, Forrest KY, Orchard TJ. Low-density lipoprotein particle size and coronary artery disease in a childhood-onset type 1 diabetes population. Metabolism 1999;48(4):531-4.	E	TA												X
1167	Erceg M, Ivičević-Uhernik A, Kern J, Vuletić S. Five-year cumulative incidence of hypertension in adult Croatian population: The CroHort study. Collegium Antropologicum 2012;36(SUPPL. 1):83-87.	E	TA												X
1168	Erfurth EM. Endocrine aspects and sequel in patients with craniopharyngioma. Journal of Pediatric Endocrinology and Metabolism 2015;28(1-2):19-26.	E	TA												X
1169	Erfurth EM, Holmer H, Fjalldal SB. Mortality and morbidity in adult craniopharyngioma. Pituitary 2013;16(1):46-55.	E	TA												X
1170	Ergin S, Altan E, Pilanci O, Sirekbasan S, Cortuk O, Cizmecigil U, et al. The role of adenovirus 36 as a risk factor in obesity: The first clinical study made in the fatty tissues of adults in Turkey. Microbial Pathogenesis 2015;80:57-62.	E	TA												X
1171	Eriksson J, Forsen T, Tuomilehto J, Osmond C, Barker D. Fetal and childhood growth and hypertension in adult life. Hypertension 2000;36(5):790-4.	E	F												X	Outcome: HT
1172	Eriksson JG. Early growth, and coronary heart disease and type 2 diabetes: experiences from the Helsinki Birth Cohort Studies. International Journal of Obesity 2006;30:S18-S22.	E	TA												X
1173	Eriksson JG. Epidemiology, genes and the environment: lessons learned from the Helsinki Birth Cohort Study. Journal of Internal Medicine 2007;261(5):418-425.	E	TA												X
1174	Eriksson JG. Early growth and coronary heart disease and type 2 diabetes: findings from the Helsinki Birth Cohort Study (HBCS). Am J Clin Nutr 2011;94(6 Suppl):1799S-1802S.	E	F												X
1175	Eriksson JG, Forsen T, Tuomilehto J, Jaddoe VW, Osmond C, Barker DJ. Effects of size at birth and childhood growth on the insulin resistance syndrome in elderly individuals. Diabetologia 2002;45(3):342-8.	E	TA												X
1176	Eriksson JG, Forsen T, Tuomilehto J, Osmond C, Barker DJP. Early growth and coronary heart disease in later life: longitudinal study. British Medical Journal 2001;322(7292):949-953.	E	TA												X
1177	Eriksson JG, Forsen T, Tuomilehto J, Winter PD, Osmond C, Barker DJP. Catch-up growth in childhood and death from coronary heart disease: longitudinal study. British Medical Journal 1999;318(7181):427-431.	E	TA												X
1178	Eriksson JG, Forsén TJ, Kajantie E, Osmond C, Barker DJP. Childhood growth and hypertension in later life. Hypertension 2007;49(6):1415-1421.	E	F												X	Outcome: HT
1179	Eriksson JG, Sandboge S, Salonen M, Kajantie E, Osmond C. Maternal weight in pregnancy and offspring body composition in late adulthood: Findings from the Helsinki Birth Cohort Study (HBCS). Annals of Medicine 2015;47(2):94-99.	E	TA												X
1180	Eriksson JG, Sandboge S, Salonen MK, Kajantie E, Osmond C. Long-term consequences of maternal overweight in pregnancy on offspring later health: Findings from the Helsinki Birth Cohort Study. Annals of Medicine 2014;46(6):434-438.	E	TA												X
1181	Eriksson UK, van Bodegom D, May L, Boef AGC, Westendorp RGJ. Low C-Reactive Protein Levels in a Traditional West-African Population Living in a Malaria Endemic Area. Plos One 2013;8(7).	E	TA												X
1182	Erlichman J, Kerbey AL, James WPT. Physical activity and its impact on health outcomes. Paper 2: Prevention of unhealthy weight gain and obesity by physical activity: An analysis of the evidence. Obesity Reviews 2002;3(4):273-287.	E	TA												X
1183	Erman A, Veilleux A, Tchernof A, Goodyer CG. Human growth hormone receptor (GHR) expression in obesity: I. GHR mRNA expression in omental and subcutaneous adipose tissues of obese women. International Journal of Obesity 2011;35(12):1511-1519.	E	TA												X
1184	Ernst ND, Obarzanek E. Child health and nutrition: obesity and high blood cholesterol. Prev Med 1994;23(4):427-36.	E	TA	X											X
1185	Ervasti J, Vahtera J, Pentti J, Oksanen T, Ahola K, Kivekas T, et al. Return to Work After Depression-Related Absence by Employees With and Without Other Health Conditions: A Cohort Study. Psychosomatic Medicine 2015;77(2):126-135.	E	TA												X
1186	Esbenshade AJ, Simmons JH, Koyama T, Koehler E, Whitlock JA, Friedman DL. Body mass index and blood pressure changes over the course of treatment of pediatric acute lymphoblastic leukemia. Pediatr Blood Cancer 2011;56(3):372-8.	E	TA												X
1187	Esbenshade AJ, Simmons JH, Koyama T, Lindell RB, Friedman DL. Obesity and insulin resistance in pediatric acute lymphoblastic leukemia worsens during maintenance therapy. Pediatr Blood Cancer 2013;60(8):1287-91.	E	TA												X
1188	Eschalier R, Chenaf C, Mulliez A, Yalioua A, Clerfond G, Authier N, et al. Impact of Clinical Characteristics and Management on the Prognosis of Unselected Heart Failure Patients. Cardiovascular Drugs and Therapy 2015;29(1):89-98.	E	TA												X
1189	Eshaghian S, Horwich TB, Fonarow GC. Relation of loop diuretic dose to mortality in advanced heart failure. Am J Cardiol 2006;97(12):1759-64.	E	TA												X
1190	Esmaillzadeh A, Mirmiran P, Azizi F. Whole-grain consumption and the metabolic syndrome: a favorable association in Tehranian adults. Eur J Clin Nutr 2005;59(3):353-62.	E	TA												X
1191	Espino-Lorenzo P, Manrique-Arija S, Urena I, Jimenez-Nunez FG, Lopez-Lasanta M, Romero-Barco CM, et al. Baseline comorbidities in patients with rheumatoid arthritis who have been prescribed biological therapy: a case control study. Reumatol Clin 2013;9(1):18-23.	E	TA												X
1192	Espinola-Zavaleta N, Casanova-Garces JM, Castellanos LM, Ibanez F, Keirns C, Amezcua-Guerra LM, et al. Echocardiometric evaluation of cardiovascular abnormalities in Marfan syndrome. Archivos de Cardiologia de Mexico 2005;75(2):133-140.	E	TA												X
1193	Espinosa-de-Los-Monteros AL, Sosa E, Martinez N, Mercado M. Persistence of Cushing's disease symptoms and comorbidities after surgical cure: a long-term, integral evaluation. Endocr Pract 2013;19(2):252-8.	E	TA												X
1194	Esposito T, Lea RA, Maher BH, Moses D, Cox HC, Magliocca S, et al. Unique X-linked familial FSGS with co-segregating heart block disorder is associated with a mutation in the NXF5 gene. Human Molecular Genetics 2013;22(18):3654-3666.	E	TA												X
1195	Estrada V, Geijo P, Fuentes-Ferrer M, Alcalde MLG, Rodrigo M, Galindo MJ, et al. Dyslipidaemia in HIV-infected women on antiretroviral therapy. Analysis of 922 patients from the Spanish VACH cohort. BMC Women's Health 2011;11.	E	TA												X
1196	Etemadi A, Abnet CC, Kamangar F, Islami F, Khademi H, Pourshams A, et al. Impact of body size and physical activity during adolescence and adult life on overall and cause-specific mortality in a large cohort study from Iran. Eur J Epidemiol 2014;29(2):95-109.	E	TA												X
1197	Etminan M, Bird ST, Delaney JA, Bressler B, Brophy JM. Isotretinoin and risk for inflammatory bowel disease: A nested case-control study and meta-analysis of published and unpublished data. JAMA Dermatology 2013;149(2):216-220.	E	TA												X
1198	Evans M, Fryzek JP, Elinder CG, Cohen SS, McLaughlin JK, Nyren O, et al. The natural history of chronic renal failure: results from an unselected, population-based, inception cohort in Sweden. Am J Kidney Dis 2005;46(5):863-70.	E	TA												X
1199	Even J, McCullough K, Braly B, Hohl J, Song Y, Lee J, et al. Clinical indications for arterial imaging in cervical trauma. Spine (Phila Pa 1976) 2012;37(4):286-91.	E	TA												X
1200	Evensen KA, Steinshamn S, Tjonna AE, Stolen T, Hoydal MA, Wisloff U, et al. Effects of preterm birth and fetal growth retardation on cardiovascular risk factors in young adulthood. Early Hum Dev 2009;85(4):239-45.	E	TA												X
1201	Evia-Viscarra ML, Rodea-Montero ER, Apolinar-Jiménez E, Munoz-Noriega N, García-Morales LM, Leanos-Pérez C, et al. The effects of metformin on infl ammatory mediators in obese adolescents with insulin resistance: Controlled randomized clinical trial. Journal of Pediatric Endocrinology and Metabolism 2012;25(1-2):41-49.	E	TA												X
1202	Eyzaguirre F, Bancalari R, Román R, Silva R, Youlton R, Urquidi C, et al. Prevalence of components of the metabolic syndrome according to birthweight among overweight and obese children and adolescents. Journal of Pediatric Endocrinology and Metabolism 2012;25(1-2):51-56.	E	TA												X
1203	Ezzat S, Forster MJ, Berchtold P, Redelmeier DA, Boerlin V, Harris AG. Acromegaly. Clinical and biochemical features in 500 patients. Medicine (Baltimore) 1994;73(5):233-40.	E	TA												X
1204	Fabbrini E, Tamboli RA, Magkos F, Marks-Shulman PA, Eckhauser AW, Richards WO, et al. Surgical Removal of Omental Fat Does Not Improve Insulin Sensitivity and Cardiovascular Risk Factors in Obese Adults. Gastroenterology 2010;139(2):448-455.	E	TA												X
1205	Fabris C, Vandelli C, Toniutto P, Minisini R, Colletta C, Falleti E, et al. Apolipoprotein E genotypes modulate fibrosis progression in patients with chronic hepatitis C and persistently normal transaminases. J Gastroenterol Hepatol 2011;26(2):328-33.	E	TA												X
1206	Facco FL, Ouyang DW, Zee PC, Grobman WA. Development of a pregnancy-specific screening tool for sleep apnea. J Clin Sleep Med 2012;8(4):389-94.	E	TA												X
1207	Fadzlina AA, Harun F, Haniza MYN, Al Sadat N, Murray L, Cantwell MM, et al. Metabolic syndrome among 13 year old adolescents: prevalence and risk factors. Bmc Public Health 2014;14.	E	TA												X
1208	Fährmann ER, Adkins L, Loader CJ, Han H, Rice KM, Denvir J, et al. Severe hypoglycemia and coronary artery calcification during the diabetes control and complications trial/epidemiology of diabetes interventions and complications (DCCT/EDIC) study. Diabetes Research and Clinical Practice 2015;107(2):280-289.	E	TA												X
1209	Faienza MF, Santoro N, Lauciello R, Calabro R, Giordani L, Di Salvo G, et al. IGF2 gene variants and risk of hypertension in obese children and adolescents. Pediatr Res 2010;67(4):340-4.	E	TA												X
1210	Faintuch J, Yamaguchi CM, Dias MCG, Santo MA, Faintuch JJ, Cecconello I. Biochemical correlates of bariatric-responsive diabetes. Diabetes Technology and Therapeutics 2010;12(9):707-715.	E	TA												X
1211	Fakhouri F, Bocquet N, Taupin P, Presne C, Gagnadoux MF, Landais P, et al. Steroid-sensitive nephrotic syndrome: From childhood to adulthood. American Journal of Kidney Diseases 2003;41(3):550-557.	E	TA												X
1212	Falaschetti E, Hingorani AD, Jones A, Charakida M, Finer N, Whincup P, et al. Adiposity and cardiovascular risk factors in a large contemporary population of pre-pubertal children. Eur Heart J 2010;31(24):3063-72.	E	TA												X
1213	Falcini F, Nacci F. Systemic lupus erythematosus in the young: The importance of a transition clinic. Lupus 2007;16(8):613-617.	E	TA												X
1214	Falhammar H, Nyström HF, Ekström U, Granberg S, Wedell A, Thorén M. Fertility, sexuality and testicular adrenal rest tumors in adult males with congenital adrenal hyperplasia. European Journal of Endocrinology 2012;166(3):441-449.	E	TA												X
1215	Falkner B, Hulman S, Kushner H. Birth weight versus childhood growth as determinants of adult blood pressure. Hypertension 1998;31(1 I):145-150.	E	F												X	no bl data on adiposiy in childhood
1216	Falkner KL, McCann SE, Trevisan M. Participant characteristics and quality of recall of physical activity in the distant past. American Journal of Epidemiology 2001;154(9):865-872.	E	TA												X
1217	Falkstedt D, Hemmingsson T, Rasmussen F, Lundberg I. Body mass index in late adolescence and its association with coronary heart disease and stroke in middle age among Swedish men. Int J Obes (Lond) 2007;31(5):777-83.	E	TA												X
1218	Falkstedt D, Koupil I, Hemmingsson T. Blood pressure in late adolescence and early incidence of coronary heart disease and stroke in the Swedish 1969 conscription cohort. J Hypertens 2008;26(7):1313-20.	E	TA												X
1219	Fall C. Maternal nutrition: effects on health in the next generation. Indian J Med Res 2009;130(5):593-9.	E	TA												X
1220	Fall CH, Borja JB, Osmond C, Richter L, Bhargava SK, Martorell R, et al. Infant-feeding patterns and cardiovascular risk factors in young adulthood: data from five cohorts in low- and middle-income countries. Int J Epidemiol 2011;40(1):47-62.	E	TA												X
1221	Fall CH, Sachdev HS, Osmond C, Lakshmy R, Biswas SD, Prabhakaran D, et al. Adult metabolic syndrome and impaired glucose tolerance are associated with different patterns of BMI gain during infancy: Data from the New Delhi Birth Cohort. Diabetes Care 2008;31(12):2349-56.	E	F												X	Exposure change overtime
1222	Fan Z, Wang H, Zhang B, Yu W, Zhai F. [Effect of nutritional status in childhood on health status in adulthood]. Wei Sheng Yan Jiu 2012;41(3):414-8.	E	TA								Chinese
1223	Farley J, Gona P, Crain M, Cervia J, Oleske J, Seage G, et al. Prevalence of elevated cholesterol and associated risk factors among perinatally HIV-infected children (4-19 years old) in Pediatric AIDS Clinical Trials Group 219C. J Acquir Immune Defic Syndr 2005;38(4):480-7.	E	TA												X
1224	Farquhar JW, Fortmann SP, Maccoby N, Haskell WL, Williams PT, Flora JA, et al. The Stanford Five-City Project: design and methods. Am J Epidemiol 1985;122(2):323-34.	E	TA												X
1225	Farrell SW, Finley CE, Jackson AW, Vega GL, Morrow JR, Jr. Association of Multiple Adiposity Exposures and Cardiorespiratory Fitness With All-Cause Mortality in Men: The Cooper Center Longitudinal Study. Mayo Clinic Proceedings 2014;89(6):772-780.	E	TA												X
1226	Farris RP, Cresanta JL, Frank GC, Webber LS, Berenson GS. Dietary studies of children from a biracial population: intakes of fat and fatty acids in 10- and 13-year olds. Am J Clin Nutr 1984;39(1):114-28.	E	TA												X
1227	Farzadfar F, Murray CJL, Gakidou E, Bossert T, Namdaritabar H, Alikhani S, et al. Effectiveness of diabetes and hypertension management by rural primary health-care workers (Behvarz workers) in Iran: a nationally representative observational study. Lancet 2012;379(9810):47-54.	E	TA												X
1228	Faurschou M, Sorensen IJ, Mellemkjaer L, Loft AGR, Thomsen BS, Tvede N, et al. Malignancies in Wegener's granulomatosis: Incidence and relation to cyclophosphamide therapy in a cohort of 293 patients. Journal of Rheumatology 2008;35(1):100-105.	E	TA												X
1229	Faurschou M, Westman K, Rasmussen N, de Groot K, Flossmann O, Hoglund P, et al. Brief Report: Long-term outcome of a randomized clinical trial comparing methotrexate to cyclophosphamide for remission induction in early systemic antineutrophil cytoplasmic antibody-associated vasculitis. Arthritis and Rheumatism 2012;64(10):3472-3477.	E	TA												X
1230	Fauvel JP, M'Pio I, Quelin P, Rigaud JP, Laville M, Ducher M. Neither perceived job stress nor individual cardiovascular reactivity predict high blood pressure. Hypertension 2003;42(6):1112-6.	E	TA												X
1231	Fauvel JP, Mpio I, Quelin P, Rigaud JP, Laville M, Ducher ML. [Professional stress and blood pressure reactivity to stress do not predict blood pressure at 5 years]. Arch Mal Coeur Vaiss 2004;97(7-8):767-71.	E	TA												X
1232	Fawwad A, Alvi SF, Basit A, Ahmed K, Ahmedani MY, Hakeem R. Changing pattern in the risk factors for diabetes in young adults from the rural area of Baluchistan. J Pak Med Assoc 2013;63(9):1089-93.	E	TA												X
1233	Feeley AB, Norris SA. Added sugar and dietary sodium intake from purchased fast food, confectionery, sweetened beverages and snacks among Sowetan adolescents. SAJCH South African Journal of Child Health 2014;8(3):88-91.	E	TA												X
1234	Feig DS, Shah BR, Lipscombe LL, Wu CF, Ray JG, Lowe J, et al. Preeclampsia as a Risk Factor for Diabetes: A Population-Based Cohort Study. PLoS Medicine 2013;10(4).	E	TA												X
1235	Feldstein AE, Charatcharoenwitthaya P, Treeprasertsuk S, Benson JT, Enders FB, Angulo P. The natural history of non-alcoholic fatty liver disease in children: A follow-up study for up to 20 years. Gut 2009;58(11):1538-1544.	E	TA												X
1236	Feldt K, Raikkonen K, Eriksson JG, Andersson S, Osmond C, Barker DJ, et al. Childhood growth and cardiovascular reactivity to psychological stressors in late adulthood. J Intern Med 2008;264(1):72-82.	E	TA												X
1237	Felgentreff K, Siepe M, Kotthoff S, von Kodolitsch Y, Schachtrup K, Notarangelo LD, et al. Severe eczema and Hyper-IgE in Loeys-Dietz-syndrome - Contribution to new findings of immune dysregulation in connective tissue disorders. Clinical Immunology 2014;150(1):43-50.	E	TA												X
1238	Ferguson TF, Funkhouser E, Roseman J. Factor analysis of metabolic syndrome components in the Coronary Artery Risk Development in Young Adults (CARDIA) study: examination of factors by race-sex groups and across time. Ann Epidemiol 2010;20(3):194-200.	E	TA												X
1239	Ferguson TS, Tulloch-Reid MK, Younger NO, Knight-Madden JM, Samms-Vaughan M, Ashley D, et al. Prevalence of the metabolic syndrome and its components in relation to socioeconomic status among Jamaican young adults: a cross-sectional study. BMC Public Health 2010;10:307.	E	TA		X										X
1240	Ferini-Strambi L, Fantini ML, Castronovo C. Epidemiology of obstructive sleep apnea syndrome. Minerva Med 2004;95(3):187-202.	E	TA												X
1241	Ferket BS, van Kempen BJH, Heeringa J, Spronk S, Fleischmann KE, Nijhuis RLG, et al. Personalized Prediction of Lifetime Benefits with Statin Therapy for Asymptomatic Individuals: A Modeling Study. Plos Medicine 2012;9(12).	E	TA												X
1242	Fernald LC, Grantham-McGregor SM. Stress response in school-age children who have been growth retarded since early childhood. American Journal of Clinical Nutrition 1998;68(3):691-698.	E	TA												X
1243	Fernandes J, Vogt J, Wolever TMS. Kinetic model of acetate metabolism in healthy and hyperinsulinaemic humans. European Journal of Clinical Nutrition 2014;68(9):1067-1071.	E	TA												X
1244	Fernandez MF, Parera J, Arrebola JP, Marina LS, Vrijheid M, Llop S, et al. Levels of polychlorinated dibenzo-p-dioxins, dibenzofurans and dioxin-like polychlorinated biphenyls in placentas from the Spanish INMA birth cohort study. Sci Total Environ 2012;441:49-56.	E	TA												X
1245	Fernández-De-Las-peñas C, Hernández-Barrera V, Carrasco-Garrido P, Alonso-Blanco C, Palacios-Ceña D, Jiménez-Sánchez S, et al. Population-based study of migraine in Spanish adults: Relation to socio-demographic factors, lifestyle and co-morbidity with other conditions. Journal of Headache and Pain 2010;11(2):97-104.	E	TA												X
1246	Fernandez-Egea E, Miller B, Garcia-Rizo C, Bernardo M, Kirkpatrick B. Metabolic effects of olanzapine in patients with newly diagnosed psychosis. J Clin Psychopharmacol 2011;31(2):154-9.	E	TA												X
1247	Fernandez-Torres RM, Paradela S, Fonseca E. Psoriasis in patients older than 65 years. A comparative study with younger adult psoriatic patients. J Nutr Health Aging 2012;16(6):586-91.	E	TA												X
1248	Fernberg P, Odenbro A, Bellocco R, Beffetta P, Pawitan Y, Zendehdel K, et al. Tobacco use, body mass index, and the risk of leukemia and multiple myeloma: A nationwide cohort study in Sweden. Cancer Research 2007;67(12):5983-5986.	E	TA												X
1249	Ferns SJ, Wehrmacher WH, Serratto M. Effects of obesity and gender on exercise capacity in urban children. Gend Med 2011;8(4):224-30.	E	TA												X
1250	Ferrannini E. Syndrome-X. Hormone Research 1993;39:107-111.	E	TA												X
1251	Ferrannini E, Massari M, Nannipieri M, Natali A, Lopez Ridaura R, Gonzales-Villalpando C. Plasma glucose levels as predictors of diabetes: The Mexico City diabetes study. Diabetologia 2009;52(5):818-824.	E	TA												X
1252	Ferraresso M, Ghio L, Raiteri M, Belingheri M, Beretta C, Martina V, et al. Pediatric Kidney Transplantation: A Snapshot 10 Years Later. Transplantation Proceedings 2008;40(6):1852-1853.	E	TA												X
1253	Ferrari SL, Deutsch S, Choudhury U, Chevalley T, Bonjour JP, Dermitzakis ET, et al. Polymorphisms in the low-density lipoprotein receptor-related protein 5 (LRP5) gene are associated with variation in vertebral bone mass, vertebral bone size, and stature in whites. American Journal of Human Genetics 2004;74(5):866-875.	E	TA												X
1254	Ferreira Barbosa KB, Pinheiro Volp AC, Marques-Rocha JL, Rocha Ribeiro SM, Navarro-Blasco I, Angeles Zulet M, et al. Modulators of erythrocyte glutathione peroxidase activity in healthy adults: An observational study. Redox Report 2014;19(6):251-258.	E	TA												X
1255	Ferreira CH, Naldoni LM, Ribeiro Jdos S, Meirelles MC, Cavalli Rde C, Bo K. Maternal blood pressure and heart rate response to pelvic floor muscle training during pregnancy. Acta Obstet Gynecol Scand 2014;93(7):678-83.	E	TA												X
1256	Ferreira I, Henry RMA, Twisk JWR, van Mechelen W, Kemper HCG, Stehouwer CDA. The metabolic syndrome, cardiopulmonary fitness, and subcutaneous trunk fat as independent determinants of arterial stiffness - The amsterdam growth and health longitudinal study. Archives of Internal Medicine 2005;165(8):875-882.	E	TA		X										X
1257	Ferreira I, Snijder MB, Twisk JW, van Mechelen W, Kemper HC, Seidell JC, et al. Central fat mass versus peripheral fat and lean mass: opposite (adverse versus favorable) associations with arterial stiffness? The Amsterdam Growth and Health Longitudinal Study. J Clin Endocrinol Metab 2004;89(6):2632-9.	E	TA												X
1258	Ferreira I, Twisk JW, van Mechelen W, Kemper HC, Stehouwer CD. Development of fatness, fitness, and lifestyle from adolescence to the age of 36 years: determinants of the metabolic syndrome in young adults: the amsterdam growth and health longitudinal study. Arch Intern Med 2005;165(1):42-8.	E	F												X	No data on individual components of MetS and its association with adolesent adiposity
1259	Ferreira I, Twisk JWR, Van Mechelen W, Kemper HCG, Seidell JC, Stehouwer CDA. Current and adolescent body fatness and fat distribution: Relationships with carotid intima-media thickness and large artery stiffness at the age of 36 years. Journal of Hypertension 2004;22(1):145-155.	E	F												X
1260	Ferreira I, van de Laar RJ, Prins MH, Twisk JW, Stehouwer CD. Carotid stiffness in young adults: a life-course analysis of its early determinants: the Amsterdam Growth and Health Longitudinal Study. Hypertension 2012;59(1):54-61.	E	F												X	outcome: carotid stiffness
1261	Ferreira Santana L, Silva De Sá MF, Ferriani RA, De Moura MD, Foss MC, Dos Reis RM. Effect of metformin on the clinical and metabolic assessment of women with polycystic ovary syndrome. Gynecological Endocrinology 2004;19(2):88-96.	E	F												X
1262	Ferrer M, Fernández-Britto JE, Bacallao J, Pérez H. Development of hypertension in a cohort of Cuban adolescents. MEDICC Review 2015;17(1):41-47.	E	F												X	Predictors at age 12-15 and outcome at 16-19
1263	Ferris M, Hogan SL, Chin H, Shoham DA, Gipson DS, Gibson K, et al. Obesity, albuminuria, and urinalysis findings in US young adults from the Add Health Wave III study. Clin J Am Soc Nephrol 2007;2(6):1207-14.	E	TA												X
1264	Ferris PA, Kline TJB, Bourdage JS. He said, she said: Work, biopsychosocial, and lifestyle contributions to coronary heart disease risk. Health Psychology 2012;31(4):503-511.	E	TA												X
1265	Fialkowski MK, McCrory MA, Roberts SM, Tracy JK, Grattan LM, Boushey CJ. Estimated Nutrient Intakes from Food Generally Do Not Meet Dietary Reference Intakes among Adult Members of Pacific Northwest Tribal Nations. Journal of Nutrition 2010;140(5):992-998.	E	TA												X
1266	Fieffe S, Morange I, Petrossians P, Chanson P, Rohmer V, Cortet C, et al. Diabetes in acromegaly, prevalence, risk factors, and evolution: data from the French Acromegaly Registry. European Journal of Endocrinology 2011;164(6):877-884.	E	TA												X
1267	Field AE, Malspeis S, Willett WC. Weight cycling and mortality among middle-aged or older women. Arch Intern Med 2009;169(9):881-6.	E	TA												X
1268	Field AE, Willett WC, Lissner L, Colditz GA. Dietary fat and weight gain among women in the Nurses' Health Study. Obesity (Silver Spring) 2007;15(4):967-76.	E	TA												X
1269	Figarska SM, Boezen HM, Vonk JM. Dyspnea severity, changes in dyspnea status and mortality in the general population: The Vlagtwedde/Vlaardingen study. European Journal of Epidemiology 2012;27(11):867-876.	E	TA												X
1270	Figueras F, Oros D, Cruz-Martinez R, Padilla N, Hernandez-Andrade E, Botet F, et al. Neurobehavior in term, small-for-gestational age infants with normal placental function. Pediatrics 2009;124(5):e934-41.	E	TA												X
1271	Figueroa V, Milla C, Parks EJ, Schwarzenberg SJ, Moran A. Abnormal lipid concentrations in cystic fibrosis. Am J Clin Nutr 2002;75(6):1005-11.	E	TA												X
1272	Filho JA, Salvetti XM, de Mello MT, da Silva AC, Filho BL. Coronary risk in a cohort of Paralympic athletes. Br J Sports Med 2006;40(11):918-22.	E	TA												X
1273	Filiberto AC, Mumford SL, Pollack AZ, Zhang C, Yeung EH, Perkins NJ, et al. Habitual dietary isoflavone intake is associated with decreased C-reactive protein concentrations among healthy premenopausal women. J Nutr 2013;143(6):900-6.	E	TA												X
1274	Filik R, Sipos A, Kehoe PG, Burns T, Cooper SJ, Stevens H, et al. The cardiovascular and respiratory health of people with schizophrenia. Acta Psychiatr Scand 2006;113(4):298-305.	E	TA												X
1275	Filippi E, Sentinelli F, Romeo S, Arca M, Berni A, Tiberti C, et al. The adiponectin gene SNP+276G>T associates with early-onset coronary artery disease and with lower levels of adiponectin in younger coronary artery disease patients (age ≤50 years). Journal of Molecular Medicine 2005;83(9):711-719.	E	TA												X
1276	Filler G, Yasin A, Kesarwani P, Garg AX, Lindsay R, Sharma AP. Big mother or small baby: which predicts hypertension? J Clin Hypertens (Greenwich) 2011;13(1):35-41.	E	TA												X
1277	Fineberg SJ, Oglesby M, Patel AA, Singh K. Incidence and mortality of perioperative cardiac events in cervical spine surgery. Spine 2013;38(15):1268-1274.	E	TA												X
1278	Finger RP, Issa PC, Ladewig M, Goetting C, Holz FG, Scholl HPN. Fundus Autofluorescence in Pseudoxanthoma Elasticum. Retina-the Journal of Retinal and Vitreous Diseases 2009;29(10):1496-1505.	E	TA												X
1279	Finken MJJ, Meulenbelt I, Dekker FW, Frolich M, Romijn JA, Slagboom PE, et al. The 23K variant of the R23K polymorphism in the glucocorticoid receptor gene protects against postnatal growth failure and insulin resistance after preterm birth. Journal of Clinical Endocrinology & Metabolism 2007;92(12):4777-4782.	E	TA												X
1280	Finkielstain GP, Kim MS, Sinaii N, Nishitani M, Van Ryzin C, Hill SC, et al. Clinical characteristics of a cohort of 244 patients with congenital adrenal hyperplasia. J Clin Endocrinol Metab 2012;97(12):4429-38.	E	TA												X
1281	Fisch IR, Frank J. Oral contraceptives and blood pressure. JAMA 1977;237(23):2499-503.	E	TA												X
1282	Fischer ME, Cruickshanks KJ, Schubert CR, Pinto A, Huang GH, Klein BEK, et al. The association of taste with change in adiposity-related health measures. Journal of the Academy of Nutrition and Dietetics 2014;114(8):1195-1202.	E	TA												X
1283	Flamm M, Panisch S, Winkler H, Johansson T, Weitgasser R, Soennichsen AC. Effectiveness of the Austrian disease management programme "Therapie Aktiv" for type 2 diabetes regarding the improvement of metabolic control, risk profile and guideline adherence: 2 years of follow up. Wiener Klinische Wochenschrift 2012;124(17-18):639-646.	E	TA												X
1284	Flannery CA, Rackow B, Cong X, Duran E, Selen DJ, Burgert TS. Polycystic ovary syndrome in adolescence: impaired glucose tolerance occurs across the spectrum of BMI. Pediatr Diabetes 2013;14(1):42-9.	E	TA												X
1285	Flax VL, Bentley ME, Chasela CS, Kayira D, Hudgens MG, Knight RJ, et al. Use of lipid-based nutrient supplements by HIV-infected malawian women during lactation has no effect on infant growth from 0 to 24 weeks. Journal of Nutrition 2012;142(7):1350-1356.	E	TA												X
1286	Flechtner-Mors M, Schick A, Oeztuerk S, Haenle MM, Wilhelm M, Koenig W, et al. Associations of fatty liver disease and other factors affecting serum SHBG concentrations: a population based study on 1657 subjects. Horm Metab Res 2014;46(4):287-93.	E	TA												X
1287	Flegal KM. The obesity epidemic in children and adults: current evidence and research issues. Med Sci Sports Exerc 1999;31(11 Suppl):S509-14.	E	TA	X											X
1288	Fletcher HM, Wharfe G, Williams NP, Pedican M, Brooks A, Scott P, et al. Venous thromboembolism in Jamaican women: experience in a university hospital in Kingston. West Indian Med J 2009;58(3):243-9.	E	TA												X
1289	Flint J, Kothare SV, Zihlif M, Suarez E, Adams R, Legido A, et al. Association between Inadequate Sleep and Insulin Resistance in Obese Children. Journal of Pediatrics 2007;150(4):364-369.	E	TA												X
1290	Flood-Nichols SK, Tinnemore D, Huang RR, Napolitano PG, Ippolito DL. Vitamin D Deficiency in Early Pregnancy. Plos One 2015;10(4).	E	TA												X
1291	Flores G, Lin H. Factors predicting severe childhood obesity in kindergarteners. Int J Obes (Lond) 2013;37(1):31-9.	E	TA												X
1292	Florin TA, Fryer GE, Miyoshi T, Weitzman M, Mertens AC, Hudson MM, et al. Physical inactivity in adult survivors of childhood acute lymphoblastic leukemia: a report from the childhood cancer survivor study. Cancer Epidemiol Biomarkers Prev 2007;16(7):1356-63.	E	TA												X
1293	Flum DR, Belle SH, King WC, Wahed AS, Berk P, Chapman W, et al. Perioperative Safety in the Longitudinal Assessment of Bariatric Surgery. New England Journal of Medicine 2009;361(5):445-454.	E	TA												X
1294	Focant J-F, Frery N, Bidondo M-L, Eppe G, Scholl G, Saoudi A, et al. Levels of polychlorinated dibenzo-p-dioxins, polychlorinated dibenzofurans and polychlorinated biphenyls in human milk from different regions of France. Science of the Total Environment 2013;452:155-162.	E	TA												X
1295	Foeldvari I, Nihtyanova SI, Wierk A, Denton CP. Characteristics of Patients with Juvenile Onset Systemic Sclerosis in an Adult Single-center Cohort. Journal of Rheumatology 2010;37(11):2422-2426.	E	TA												X
1296	Fogarty AW, Glancy C, Jones S, Lewis SA, McKeever TM, Britton JR. A prospective study of weight change and systemic inflammation over 9 y. Am J Clin Nutr 2008;87(1):30-5.	E	TA												X
1297	Fogelholm M. How physical activity can work? Int J Pediatr Obes 2008;3 Suppl 1:10-4.	E	TA												X
1298	Foldemo A, Wardig R, Bachrach-Lindstrom M, Edman G, Holmberg T, Lindstrom T, et al. Health-related quality of life and metabolic risk in patients with psychosis. Schizophr Res 2014;152(1):295-9.	E	TA												X
1299	Foley RN, Collins AJ, Herzog CA, Ishani A, Kalra PA. Serum Phosphate and Left Ventricular Hypertrophy in Young Adults: The Coronary Artery Risk Development in Young Adults Study. Kidney & Blood Pressure Research 2009;32(1):37-44.	E	TA												X
1300	Folsom AR, Burke GL, Ballew C, Jacobs DR, Haskell WL, Donahue RP, et al. Relation of body fatness and its distribution to cardiovascular risk factors in young blacks and whites: The role of insulin. American Journal of Epidemiology 1989;130(5):911-924.	E	TA		X										X
1301	Fonseca FL, Brandão AA, Pozzan R, Campana ÉMG, Pizzi OL, Magalhães MEC, et al. Overweight and cardiovascular risk among young adults followed-up for 17 years: The Rio de Janeiro study, Brazil. Arquivos Brasileiros de Cardiologia 2010;94(2):196-204+193-201+207-215.	E	TA												X	Exposure combined with adult bmi categories
1302	Ford CA, Nonnemaker JM, Wirth KE. The influence of adolescent body mass index, physical activity, and tobacco use on blood pressure and cholesterol in young adulthood. J Adolesc Health 2008;43(6):576-83.	E	F											X
1303	Ford DE, Erlinger TP. Depression and C-reactive protein in US adults: data from the Third National Health and Nutrition Examination Survey. Arch Intern Med 2004;164(9):1010-4.	E	TA												X
1304	Ford JL, Browning CR. Effects of exposure to violence with a weapon during adolescence on adult hypertension. Ann Epidemiol 2014;24(3):193-8.	E	TA												X
1305	Forget G, Doyon M, Lacerte G, Labonte M, Brown C, Carpentier AC, et al. Adoption of American Heart Association 2020 Ideal Healthy Diet Recommendations Prevents Weight Gain in Young Adults. Journal of the Academy of Nutrition and Dietetics 2013;113(11):1517-1522.	E	TA												X
1306	Forman MR, Cantwell MM, Ronckers C, Zhang YW. Through the looking glass at early-life exposures and breast cancer risk. Cancer Investigation 2005;23(7):609-624.	E	TA												X
1307	Fornage M, Jacobs Jr DR, Steffes MW, Gross MD, Bray MS, Schreiner PJ. Inverse effects of the PPARγ2 Pro12Ala polymorphism on measures of adiposity over 15 years in African Americans and whites: The CARDIA study. Metabolism: Clinical and Experimental 2005;54(7):910-917.	E	TA												X
1308	Fornage M, Papanicolaou G, Lewis CE, Boerwinkle E, Siscovick DS. Common INSIG2 polymorphisms are associated with age-related changes in body size and high-density lipoprotein cholesterol from young adulthood to middle age. Metabolism 2010;59(8):1084-91.	E	TA												X
1309	Forsen T, Eriksson JG, Tuomilehto J, Osmond C, Barker DJ. Growth in utero and during childhood among women who develop coronary heart disease: longitudinal study. BMJ 1999;319(7222):1403-7.	E	TA												X
1310	Forsén T, Osmond C, Eriksson JG, Barker DJP. Growth of girls who later develop coronary heart disease. Heart 2004;90(1):20-24.	E	TA												X
1311	Forsén TJ, Eriksson JG, Osmond C, Barker DJP. The infant growth of boys who later develop coronary heart disease. Annals of Medicine 2004;36(5):389-392.	E	TA												X
1312	Forshee RA, Storey ML, Ritenbaugh C. Breast cancer risk and lifestyle differences among premenopausal and postmenopausal African-American women and white women. Cancer 2003;97(1 Suppl):280-8.	E	TA												X
1313	Forsmo S, Fjeldbo SK, Langhammer A. Childhood cod liver oil consumption and bone mineral density in a population-based cohort of peri- and postmenopausal women: the Nord-Trondelag Health Study. Am J Epidemiol 2008;167(4):406-11.	E	TA												X
1314	Forsythe RM, Peitzman AB, DeCato T, Rosengart MR, Watson GA, Marshall GT, et al. Early lower extremity fracture fixation and the risk of early pulmonary embolus: filter before fixation? J Trauma 2011;70(6):1381-8.	E	TA												X
1315	Fort J, Cuevas X, Garcia F, Perez-Garcia R, Llados F, Lozano J, et al. Mortality in incident haemodialysis patients: time-dependent haemoglobin levels and erythropoiesis-stimulating agent dose are independent predictive factors in the ANSWER study. Nephrol Dial Transplant 2010;25(8):2702-10.	E	TA												X
1316	Fortner RT, Pekow P, Solomon CG, Markenson G, Chasan-Taber L. Prepregnancy body mass index, gestational weight gain, and risk of hypertensive pregnancy among Latina women. American Journal of Obstetrics and Gynecology 2008;200(2):167.e1-167.e7.	E	TA												X
1317	Fortuny C, Deya-Martinez A, Chiappini E, Galli L, de Martino M, Noguera-Julian A. Metabolic and Renal Adverse Effects of Antiretroviral Therapy in HIV-infected Children and Adolescents. Pediatr Infect Dis J 2015;34(5 Suppl 1):S36-43.	E	TA												X
1318	Foster C, Burton A, Scholl J, Scott ML, Gunter V, McCormick K. Lipid patterns in treated growth hormone deficient children vs. short stature controls. J Pediatr Endocrinol Metab 2014;27(9-10):909-14.	E	TA												X
1319	Foster MC, Hwang SJ, Larson MG, Lichtman JH, Parikh NI, Vasan RS, et al. Overweight, Obesity, and the Development of Stage 3 CKD: The Framingham Heart Study. American Journal of Kidney Diseases 2008;52(1):39-48.	E	TA												X
1320	Fowler NM, Beach JM, Krakovitz P, Spalding SJ. Airway manifestations in childhood granulomatosis with polyangiitis (Wegener's). Arthritis Care & Research 2012;64(3):434-440.	E	TA												X
1321	Fox ER, Wilson RS, Penman AD, King JJ, Towery JG, Butler KR, et al. Epidemiology of pure valvular regurgitation in the large middle-aged African American cohort of the Atherosclerosis Risk in Communities study. American Heart Journal 2007;154(6):1229-1234.	E	TA												X
1322	Fox KM, Grandy S. Out-of-pocket expenses and healthcare resource utilization among individuals with or at risk of diabetes mellitus. Curr Med Res Opin 2008;24(12):3323-9.	E	TA												X
1323	Fox R. Overweight children. Circulation 2003;108(21):e9071.	E	TA												X	News
1324	Fragopoulou E, Panagiotakos DB, Pitsavos C, Chrysohoou C, Nomikos T, Evangelopoulos A, et al. N-terminal ProBNP distribution and correlations with biological characteristics in apparently healthy Greek population: ATTICA study. Angiology 2010;61(4):397-404.	E	TA												X
1325	Franch-Nadal J, Carmen Martinez-Sierra M, Espelt A, Sagarra-Busquets E, Patitucci-Gomez F, Goday-Arno A. The Diabetic Immigrant: Cardiovascular Risk Factors and Control. Contributions of the IDIME Study. Revista Espanola De Cardiologia 2013;66(1):39-46.	E	TA												X
1326	Franchini M, Lippi G, Targher G. Hyperthyroidism and venous thrombosis: A casual or causal association? A systematic literature review. Clinical and Applied Thrombosis/Hemostasis 2011;17(4):387-392.	E	TA												X
1327	Franco OH, Massaro JM, Civil J, Cobain MR, O'Malley B, D'Agostino RB, Sr. Trajectories of entering the metabolic syndrome: the framingham heart study. Circulation 2009;120(20):1943-50.	E	F												X	Mean age of cohort 51.6y. The cohort consisted of ages 5 to 70 at baseline who were FU for 4 examinations
1328	Francois A, Maumus S, Vincent-Viry M, Gueguen R, Siest G, Visvikis S. Age- and sex-related reference values for serum insulin concentration and its biological determinants in a French healthy population. The STANISLAS cohort. Clin Chem Lab Med 2004;42(10):1140-9.	E	TA												X
1329	Francque S, de Maeght S, Adler M, Deltenre P, de Galocsy C, Orlent H, et al. High prevalence of advanced fibrosis in association with the metabolic syndrome in a Belgian prospective cohort of NAFLD patients with elevated ALT. results of the Belgian NAFLD registry. Acta Gastro-Enterologica Belgica 2011;74(1):9-16.	E	TA												X
1330	Frank GC, Zive M, Nelson J, Broyles SL, Nader PR. Fat and cholesterol avoidance among Mexican-American and Anglo preschool children and parents. J Am Diet Assoc 1991;91(8):954-8, 961.	E	TA												X
1331	Frankel S, Elwood P, Sweetnam P, Yarnell J, Smith GD. Birthweight, body-mass index in middle age, and incident coronary heart disease. Lancet 1996;348(9040):1478-80.	E	TA												X
1332	Frankenburg FR, Zanarini MC. The association between borderline personality disorder and chronic medical illnesses, poor health-related lifestyle choices, and costly forms of health care utilization. J Clin Psychiatry 2004;65(12):1660-5.	E	TA												X
1333	Franko DL, Thompson D, Russell R, Schreiber GB, Crawford PB, Daniels SR, et al. Correlates of persistent thinness in black and white young women. Obes Res 2005;13(11):2006-13.	E	TA												X
1334	Franks PW, Hanson RL, Knowler WC, Moffett C, Enos G, Infante AM, et al. Childhood predictors of young-onset type 2 diabetes. Diabetes 2007;56(12):2964-72.	E	F												X	outcome: diabtetes
1335	Franks PW, Hanson RL, Knowler WC, Sievers ML, Bennett PH, Looker HC. Childhood obesity, other cardiovascular risk factors, and premature death. N Engl J Med 2010;362(6):485-93.	E	F												X	outcome: premature death
1336	Franks PW, Knowler WC, Nair S, Koska J, Lee YH, Lindsay RS, et al. Interaction between an 11 beta HSD1 gene variant and birth era modifies the risk of hypertension in Pima Indians. Hypertension 2004;44(5):681-688.	E	TA												X
1337	Fraser A, Lawlor DA. Long-term health outcomes in offspring born to women with diabetes in pregnancy. Curr Diab Rep 2014;14(5):489.	E	TA												X
1338	Fraser A, Macdonald-Wallis C, Tilling K, Boyd A, Golding J, Davey Smith G, et al. Cohort Profile: the Avon Longitudinal Study of Parents and Children: ALSPAC mothers cohort. Int J Epidemiol 2013;42(1):97-110.	E	TA												X
1339	Fraser A, Nelson SM, Macdonald-Wallis C, Cherry L, Butler E, Sattar N, et al. Associations of pregnancy complications with calculated cardiovascular disease risk and cardiovascular risk factors in middle age: the Avon Longitudinal Study of Parents and Children. Circulation 2012;125(11):1367-80.	E	TA												X
1340	Fraser A, Nelson SM, Macdonald-Wallis C, Sattar N, Lawlor DA. Hypertensive disorders of pregnancy and cardiometabolic health in adolescent offspring. Hypertension 2013;62(3):614-20.	E	TA												X
1341	Fraser A, Tilling K, Macdonald-Wallis C, Hughes R, Sattar N, Nelson SM, et al. Associations of gestational weight gain with maternal body mass index, waist circumference, and blood pressure measured 16 y after pregnancy: The Avon Longitudinal Study of Parents and Children (ALSPAC). American Journal of Clinical Nutrition 2011;93(6):1285-1292.	E	TA												X
1342	Fraser A, Tilling K, Macdonald-Wallis C, Sattar N, Brion M-J, Benfield L, et al. Association of Maternal Weight Gain in Pregnancy With Offspring Obesity and Metabolic and Vascular Traits in Childhood. Circulation 2010;121(23):2557-U48.	E	TA												X
1343	Frayn K, Bernard S, Spalding K, Arner P. Adipocyte triglyceride turnover is independently associated with atherogenic dyslipidemia. J Am Heart Assoc 2012;1(6):e003467.	E	TA												X
1344	Frazier AL, Li L, Cho E, Willett WC, Colditz GA. Adolescent diet and risk of breast cancer. Cancer Causes Control 2004;15(1):73-82.	E	TA												X
1345	Frederick IO, Qiu C, Enquobahrie DA, Aurora SK, Peterlin BL, Gelaye B, et al. Lifetime Prevalence and Correlates of Migraine Among Women in a Pacific Northwest Pregnancy Cohort Study. Headache 2014;54(4):675-685.	E	TA												X
1346	Frederick IO, Rudra CB, Miller RS, Foster JC, Williams MA. Adult weight change, weight cycling, and prepregnancy obesity in relation to risk of preeclampsia. Epidemiology 2006;17(4):428-34.	E	TA												X
1347	Freedman DS. Clustering of coronary heart disease risk factors among obese children. J Pediatr Endocrinol Metab 2002;15(8):1099-108.	E	TA												X
1348	Freedman DS, Dietz WH, Srinivasan SR, Berenson GS. Risk factors and adult body mass index among overweight children: the Bogalusa Heart Study. Pediatrics 2009;123(3):750-7.	E	F												X	Outcome: Adult BMI
1349	Freedman DS, Dietz WH, Tang R, Mensah GA, Bond MG, Urbina EM, et al. The relation of obesity throughout life to carotid intima-media thickness in adulthood: the Bogalusa Heart Study. Int J Obes Relat Metab Disord 2004;28(1):159-66.	E	F												X	Outcome: CIM
1350	Freedman DS, Fulton JE, Dietz WH, Pan L, Nihiser AJ, Srinivasan SR, et al. The identification of children with adverse risk factor levels by body mass index cutoffs from 2 classification systems: The Bogalusa Heart Study. American Journal of Clinical Nutrition 2010;92(6):1298-1305.	E	F												X	Mean baseline age 23y and mean FU 11 years
1351	Freedman DS, Katzmarzyk PT, Dietz WH, Srinivasan SR, Berenson GS. The relation of BMI and skinfold thicknesses to risk factors among young and middle-aged adults: The Bogalusa Heart Study. Annals of Human Biology 2010;37(6):726-737.	E	F												X	Another study from BHS that had all 6 outcomes
1353	Freedman DS, Khan LK, Serdula MK, Dietz WH, Srinivasan SR, Berenson GS. Inter-relationships among childhood BMI, childhood height, and adult obesity: the Bogalusa Heart Study. International Journal of Obesity 2004;28(1):10-16.	E	F												X	Outcome: Adult adiposity
1354	Freedman DS, Mei Z, Srinivasan SR, Berenson GS, Dietz WH. Cardiovascular risk factors and excess adiposity among overweight children and adolescents: the Bogalusa Heart Study. J Pediatr 2007;150(1):12-17 e2.	E	F												X
1355	Freedman DS, Patel DA, Srinivasan SR, Chen W, Tang R, Bond MG, et al. The contribution of childhood obesity to adult carotid intima-media thickness: The Bogalusa Heart Study. International Journal of Obesity 2008;32(5):749-756.	E	F												X	Outcome: adult IMT
1356	Freedman DS, Shear CL, Burke GL, Srinivasan SR, Webber LS, Harsha DW, et al. Persistence of Juvenile-Onset Obesity over 8 Years - the Bogalusa Heart-Study. American Journal of Public Health 1987;77(5):588-592.	E	F												X
1357	Freedman DS, Srinivasan SR, Shear CL, Hunter SM, Croft JB, Webber LS, et al. Cigarette smoking initiation and longitudinal changes in serum lipids and lipoproteins in early adulthood: the Bogalusa Heart Study. Am J Epidemiol 1986;124(2):207-19.	E	TA												X
1358	Frerichs RR, Webber LS, Voors AW, Srinivasan SR, Berenson GS. Cardiovascular-Disease Risk Factor Variables in Children at 2 Successive Years - Bogalusa Heart-Study. Journal of Chronic Diseases 1979;32(3):251-262.	E	TA												X	Tracking of BMI, BP and lipid from childhood to adulthood
1359	Frerix M, Stegbauer J, Dragun D, Kreuter A, Weiner SM. Ulnar artery occlusion is predictive of digital ulcers in SSc: a duplex sonography study. Rheumatology 2012;51(4):735-742.	E	TA												X
1360	Freund J, Meiman J, Kraus C. Using electronic medical record data to characterize the level of medication use by age-groups in a network of primary care clinics. J Prim Care Community Health 2013;4(4):286-93.	E	TA												X
1361	Friebe D, Kovacs P, Neef M, Blher S, Schleinitz D, Kiess W, et al. The promoter variant -803G>A in the RBP4 gene is not associated with BMI, metabolic parameters or blood pressure in caucasian children. Experimental and Clinical Endocrinology and Diabetes 2011;119(10):628-632.	E	TA												X
1362	Friebe D, Neef M, Kratzsch J, Erbs S, Dittrich K, Garten A, et al. Leucocytes are a major source of circulating nicotinamide phosphoribosyltransferase (NAMPT)/pre-B cell colony (PBEF)/visfatin linking obesity and inflammation in humans. Diabetologia 2011;54(5):1200-1211.	E	TA												X
1363	Fried AM, Kreel L, Cosgrove DO. The hepatic interlobar fissure: combined in vitro and in vivo study. AJR Am J Roentgenol 1984;143(3):561-4.	E	TA												X
1364	Friedlander Y, Kark JD, Sinnreich R, Tracy RP, Siscovick DS. Fibrinogen and CRP in Israeli families: Genetic and environmental sources of concentrations and longitudinal changes. Atherosclerosis 2006;189(1):169-177.	E	TA												X
1365	Friedman GD, Tekawa I, Grimm RH, Manolio T, Shannon SG, Sidney S. The leucocyte count: correlates and relationship to coronary risk factors: the CARDIA study. Int J Epidemiol 1990;19(4):889-93.	E	TA												X
1366	Fries JF, Fries ST, Parcell CL, Harrington H. Health risk changes with a low-cost individualized health promotion program: effects at up to 30 months. Am J Health Promot 1992;6(5):364-71.	E	TA												X
1367	Frighi V, Stephenson MT, Morovat A, Jolley IE, Trivella M, Dudley CA, et al. Safety of antipsychotics in people with intellectual disability. Br J Psychiatry 2011;199(4):289-95.	E	TA												X
1368	Friis CM, Qvigstad E, Paasche Roland MC, Godang K, Voldner N, Bollerslev J, et al. Newborn body fat: associations with maternal metabolic state and placental size. PLoS One 2013;8(2):e57467.	E	TA												X
1369	Frisbee SJ, Chambers CB, Frisbee JC, Goodwill AG, Crout RJ. Self-reported dental hygiene, obesity, and systemic inflammation in a pediatric rural community cohort. BMC Oral Health 2010;10:21.	E	TA												X
1370	Frith J, Day CP, Henderson E, Burt AD, Newton JL. Non-alcoholic fatty liver disease in older people. Gerontology 2009;55(6):607-613.	E	TA												X
1371	Froberg K, Andersen LB. Mini review: physical activity and fitness and its relations to cardiovascular disease risk factors in children. Int J Obes (Lond) 2005;29 Suppl 2:S34-9.	E	TA												X
1372	Frohnert BI, Jacobs DR, Jr., Steinberger J, Moran A, Steffen LM, Sinaiko AR. Relation between serum free fatty acids and adiposity, insulin resistance, and cardiovascular risk factors from adolescence to adulthood. Diabetes 2013;62(9):3163-9.	E	F												X
1373	Frohnert BI, Ode KL, Moran A, Nathan BM, Laguna T, Holme B, et al. Impaired fasting glucose in cystic fibrosis. Diabetes Care 2010;33(12):2660-2664.	E	TA												X
1374	Fromm A, Thomassen L, Naess H, Meijer R, Eide GE, Kråkenes J, et al. The Norwegian Stroke in the Young Study (NOR-SYS): Rationale and design. BMC Neurology 2013;13.	E	TA												X
1375	Frontini MG, Srinivasan SR, Berenson GS. Longitudinal changes in risk variables underlying metabolic Syndrome X from childhood to young adulthood in female subjects with a history of early menarche: the Bogalusa Heart Study. Int J Obes Relat Metab Disord 2003;27(11):1398-404.	E	F												X
1376	Frontini MG, Srinivasan SR, Xu J, Berenson GS. Low birth weight and longitudinal trends of cardiovascular risk factor variables from childhood to adolescence: The bogalusa heart study. BMC Pediatrics 2004;4.	E	TA												X
1377	Frontini MG, Srinivasan SR, Xu J, Tang R, Bond MG, Berenson GS. Usefulness of childhood non-high density lipoprotein cholesterol levels versus other lipoprotein measures in predicting adult subclinical atherosclerosis: the Bogalusa Heart Study. Pediatrics 2008;121(5):924-9.	E	TA												X
1378	Frost AE, Badesch DB, Barst RJ, Benza RL, Elliott G, Farber HW, et al. The Changing Picture of Patients With Pulmonary Arterial Hypertension in the United States How REVEAL Differs From Historic and Non-US Contemporary Registries. Chest 2011;139(1):128-137.	E	TA												X
1379	Fruzzetti F, Lello S, Lazzarini V, Fratta S, Orru M, Sorge R, et al. The oral contraceptive containing 30 microg of ethinylestradiol plus 3 mg of drospirenone is able to antagonize the increase of extracellular water occurring in healthy young women during the luteal phase of the menstrual cycle: an observational study. Contraception 2007;75(3):199-203.	E	TA												X
1380	Fruzzetti F, Perini D, Lazzarini V, Parrini D, Genazzani AR. Adolescent girls with polycystic ovary syndrome showing different phenotypes have a different metabolic profile associated with increasing androgen levels. Fertil Steril 2009;92(2):626-34.	E	TA												X
1381	Fuchs FD, Moreira LB, Moraes RS, Bredemeier M, Cardozo SC. [Prevalence of systemic arterial hypertension and associated risk factors in the Porto Alegre metropolitan area. Populational-based study]. Arq Bras Cardiol 1994;63(6):473-9.	E	TA												X
1382	Fuchs SC, Alencastro PR, Ikeda ML, Barcellos NT, Wolff FH, Brandao AB, et al. Risk of coronary heart disease among HIV-infected patients: a multicenter study in Brazil. ScientificWorldJournal 2013;2013:163418.	E	TA												X
1383	Fuemmeler BF, Ostbye T, Yang C, McClernon FJ, Kollins SH. Association between attention-deficit/hyperactivity disorder symptoms and obesity and hypertension in early adulthood: a population-based study. Int J Obes (Lond) 2011;35(6):852-62.	E	TA												X
1384	Fujieda Y, Atsumi T, Amengual O, Odani T, Otomo K, Kato M, et al. Predominant prevalence of arterial thrombosis in Japanese patients with antiphospholipid syndrome. Lupus 2012;21(14):1506-1514.	E	TA												X
1385	Fukui-Soubou M, Terashima H, Kawashima K, Utsunomiya O, Terada T. Efficacy, safety, and palatability of RACTAB ® formulation amlodipine orally disintegrating tablets. Drugs in R and D 2011;11(4):327-336.	E	TA												X
1386	Fulghesu AM, Romualdi D, Di Florio C, Sanna S, Tagliaferri V, Gambineri A, et al. Is there a dose-response relationship of metformin treatment in patients with polycystic ovary syndrome? Results from a multicentric study. Human Reproduction 2012;27(10):3057-3066.	E	TA												X
1387	Fulton JE, Dai S, Steffen LM, Grunbaum JA, Shah SM, Labarthe DR. Physical Activity, Energy Intake, Sedentary Behavior, and Adiposity in Youth. American Journal of Preventive Medicine 2009;37(1 SUPPL.):S40-S49.	E	TA												X
1388	Funatogawa I, Funatogawa T, Yano E. Do overweight children necessarily make overweight adults? Repeated cross sectional annual nationwide survey of Japanese girls and women over nearly six decades. British Medical Journal 2008;337(7668).	E	TA												X
1389	Furst DE, Clarke AE, Fernandes AW, Bancroft T, Greth W, Iorga SR. Incidence and prevalence of adult systemic lupus erythematosus in a large US managed-care population. Lupus 2013;22(1):99-105.	E	TA												X
1390	Furuta S, Chaudhry AN, Hamano Y, Fujimoto S, Nagafuchi H, Makino H, et al. Comparison of Phenotype and Outcome in Microscopic Polyangiitis Between Europe and Japan. Journal of Rheumatology 2014;41(2):325-333.	E	TA												X
1391	Fusaro M, Noale M, Viola V, Galli F, Tripepi G, Vajente N, et al. Vitamin K, Vertebral Fractures, Vascular Calcifications, and Mortality: VItamin K Italian (VIKI) Dialysis Study. Journal of Bone and Mineral Research 2012;27(11):2271-2278.	E	TA												X
1392	Fusco M, James S, Cornell C, Okerson T. Weight loss through adjustable gastric banding and improvement in daytime sleepiness: 2 year interim results of APEX study. Curr Med Res Opin 2014;30(5):849-55.	E	TA												X
1393	Gabriel SE. Heart disease and rheumatoid arthritis: understanding the risks. Annals of the Rheumatic Diseases 2010;69:61-64.	E	TA												X
1394	Gaddi A, Cicero AFG, Odo Wani FO, Dormi A, Pasquarelli V, D'Addato S. The realization of a project aimed at reducing the plasmatic lipid level in a large Italian population improves the mean calcium daily intake: The Brisighella Study. European Journal of Clinical Nutrition 2001;55(2):97-106.	E	TA												X
1395	Gademan MGJ, Vermeulen M, Oostvogels AJJM, Roseboom TJ, Visscher TLS, Van Eijsden M, et al. Maternal prepregancy BMI and lipid profile during early pregnancy are independently associated with offspring's body composition at age 5-6 Years: The ABCD study. PLoS ONE 2014;9(4).	E	TA												X
1396	Gage MJ, Schwarzkopf R, Abrouk M, Slover JD. Impact of metabolic syndrome on perioperative complication rates after total joint arthroplasty surgery. J Arthroplasty 2014;29(9):1842-5.	E	TA												X
1397	Gagnadoux F, Le Vaillant M, Goupil F, Pigeanne T, Chollet S, Masson P, et al. Influence of Marital Status and Employment Status on Long-Term Adherence with Continuous Positive Airway Pressure in Sleep Apnea Patients. Plos One 2011;6(8).	E	TA												X
1398	Gaillard R, Bakker R, Steegers EAP, Hofman A, Jaddoe VWV. Maternal Age During Pregnancy Is Associated With Third Trimester Blood Pressure Level: The Generation R Study. American Journal of Hypertension 2011;24(9):1046-1053.	E	TA												X
1399	Gaillard R, Durmus B, Hofman A, Mackenbach JP, Steegers EA, Jaddoe VW. Risk factors and outcomes of maternal obesity and excessive weight gain during pregnancy. Obesity (Silver Spring) 2013;21(5):1046-55.	E	TA												X
1400	Gaillard R, Eilers PH, Yassine S, Hofman A, Steegers EA, Jaddoe VW. Risk factors and consequences of maternal anaemia and elevated haemoglobin levels during pregnancy: a population-based prospective cohort study. Paediatr Perinat Epidemiol 2014;28(3):213-26.	E	TA												X
1401	Gaillard R, Rurangirwa AA, Williams MA, Hofman A, Mackenbach JP, Franco OH, et al. Maternal parity, fetal and childhood growth, and cardiometabolic risk factors. Hypertension 2014;64(2):266-74.	E	TA												X
1402	Gaillard R, Steegers EA, Duijts L, Felix JF, Hofman A, Franco OH, et al. Childhood cardiometabolic outcomes of maternal obesity during pregnancy: the Generation R Study. Hypertension 2014;63(4):683-91.	E	TA												X
1403	Gaillard R, Steegers EA, Tiemeier H, Hofman A, Jaddoe VW. Placental vascular dysfunction, fetal and childhood growth, and cardiovascular development: the generation R study. Circulation 2013;128(20):2202-10.	E	TA												X
1404	Gaillard R, Steegers EAP, Franco OH, Hofman A, Jaddoe VWV. Maternal weight gain in different periods of pregnancy and childhood cardio-metabolic outcomes. the Generation R Study. International Journal of Obesity 2015;39(4):677-685.	E	TA												X
1405	Gaillard R, Steegers EAP, Tiemeier H, Hofman A, Jaddoe VWV. Placental vascular dysfunction, fetal and childhood growth, and cardiovascular development: The generation r study. Circulation 2013;128(20):2202-2210.	Duplicate													Duplicate
1406	Gaitatzis A, Carroll K, Majeed A, Sander JW. The epidemiology of the comorbidity of epilepsy in the general population. Epilepsia 2004;45(12):1613-1622.	E	TA												X
1407	Galderisi M, Esposito R, Schiano-Lomoriello V, Santoro A, Ippolito R, Schiattarella P, et al. Correlates of global area strain in native hypertensive patients: a three-dimensional speckle-tracking echocardiography study. Eur Heart J Cardiovasc Imaging 2012;13(9):730-8.	E	TA												X
1408	Gale CR, Batty GD, Deary IJ. Locus of control at age 10 years and health outcomes and behaviors at age 30 years: the 1970 British Cohort Study. Psychosom Med 2008;70(4):397-403.	E	TA												X
1409	Gale CR, Batty GD, Osborn DP, Tynelius P, Rasmussen F. Mental disorders across the adult life course and future coronary heart disease: evidence for general susceptibility. Circulation 2014;129(2):186-93.	E	TA												X
1410	Gale CR, Batty GD, Osborn DPJ, Tynelius P, Whitley E, Rasmussen F. Association of Mental Disorders in Early Adulthood and Later Psychiatric Hospital Admissions and Mortality in a Cohort Study of More Than 1 Million Men. Archives of General Psychiatry 2012;69(8):823-831.	E	TA												X
1411	Gall SL, Abbott-Chapman J, Patton GC, Dwyer T, Venn A. Intergenerational educational mobility is associated with cardiovascular disease risk behaviours in a cohort of young Australian adults: The Childhood Determinants of Adult Health (CDAH) Study. BMC Public Health 2010;10:55.	E	TA												X
1412	Gall SL, Jamrozik K, Blizzard L, Dwyer T, Venn A. Healthy lifestyles and cardiovascular risk profiles in young Australian adults: the Childhood Determinants of Adult Health Study. Eur J Cardiovasc Prev Rehabil 2009;16(6):684-9.	E	TA		X										X
1413	Gallagher AM, Robson PJ, Livingstone MB, Cran GW, Strain JJ, Murray LJ, et al. Tracking of energy and nutrient intakes from adolescence to young adulthood: the experiences of the Young Hearts Project, Northern Ireland. Public Health Nutr 2006;9(8):1027-34.	E	TA												X
1414	Gallagher AM, Savage JM, Murray LJ, Smith GD, Young IS, Robson PJ, et al. A longitudinal study through adolescence to adulthood: The Young Hearts Project, Northern Ireland. Public Health 2002;116(6):332-340.	E	TA		X										X
1415	Galler A, Gelbrich G, Kratzsch J, Noack N, Kapellen T, Kiess W. Elevated serum levels of adiponectin in children, adolescents and young adults with type 1 diabetes and the impact of age, gender, body mass index and metabolic control: a longitudinal study. Eur J Endocrinol 2007;157(4):481-9.	E	TA												X
1416	Gallo S, Egeland G, Meltzer S, Legault L, Kubow S. Plasma fatty acids and desaturase activity are associated with circulating adiponectin in healthy adolescent girls. Journal of Clinical Endocrinology and Metabolism 2010;95(5):2410-2417.	E	TA												X
1417	Galobardes B, Davey Smith G, Jeffreys M, Kinra S, McCarron P. Acne in adolescence and cause-specific mortality: lower coronary heart disease but higher prostate cancer mortality: the Glasgow Alumni Cohort Study. Am J Epidemiol 2005;161(12):1094-101.	E	TA												X
1418	Gambineri A, Tomassoni F, Munarini A, Stimson RH, Mioni R, Pagotto U, et al. A combination of polymorphisms in HSD11B1 associates with in vivo 11β-HSD1 activity and metabolic syndrome in women with and without polycystic ovary syndrome. European Journal of Endocrinology 2011;165(2):283-292.	E	TA												X
1419	Gamborg M, Byberg L, Rasmussen F, Andersen PK, Baker JL, Bengtsson C, et al. Birth weight and Systolic blood pressure in adolescence and adulthood: Meta-regression analysis of sex- and age-specific results from 20 Nordic studies. American Journal of Epidemiology 2007;166(6):634-645.	E	TA												X
1420	Gangwisch JE, Malaspina D, Babiss LA, Opler MG, Posner K, Shen S, et al. Short sleep duration as a risk factor for hypercholesterolemia: Analyses of the national longitudinal study of adolescent health. Sleep 2010;33(7):956-961.	E	TA												X
1421	Ganie MA, Laway BA, Wani TA, Zargar MA, Nisar S, Ahamed F, et al. Association of subclinical hypothyroidism and phenotype, insulin resistance, and lipid parameters in young women with polycystic ovary syndrome. Fertil Steril 2011;95(6):2039-43.	E	TA												X
1422	Gann PH, Daviglus ML, Dyer AR, Stamler J. Heart rate and prostate cancer mortality: results of a prospective analysis. Cancer Epidemiol Biomarkers Prev 1995;4(6):611-6.	E	TA												X
1423	Gao X, Schwarzschild MA, Wang H, Ascherio A. Obesity and restless legs syndrome in men and women. Neurology 2009;72(14):1255-61.	E	TA												X
1424	Garceau AO, Crepinsek MK, Smith KW, Hoelscher D, Zive MM, Barosso GM, et al. Incorporating parent information with the self-reported intakes of seventh graders has a statistically significant, but small, effect on mean nutrient intakes. Journal of the American Dietetic Association 1999;99(12):1566-1569.	E	TA												X
1425	Garcia P, Sood A. Adiponectin in Pulmonary Disease and Critically Ill Patients. Current Medicinal Chemistry 2012;19(32):5493-5500.	E	TA												X
1426	Garcia RG, Celedon J, Sierra-Laguado J, Alarcon MA, Luengas C, Silva F, et al. Raised C-reactive protein and impaired flow-mediated vasodilation precede the development of preeclampsia. Am J Hypertens 2007;20(1):98-103.	E	TA												X
1427	Garcia Urena MA, Colina Ruiz-Delgado F, Moreno Gonzalez E, Jimenez Romero C, Garcia Garcia I, Loinzaz Segurola C, et al. Hepatic steatosis in liver transplant donors: common feature of donor population? World J Surg 1998;22(8):837-44.	E	TA												X
1428	Garcia-Carrasco M, Escarcega RO, Perez-Terron J, Ramirez A, Munoz-Guarneros M, Beltran A, et al. Lack of subclinical myocardial ischaemia in Mexican patients with systemic lupus erythematosus without traditional risk factors for coronary artery disease. Lupus 2007;16(4):298-301.	E	TA												X
1429	Gardin JM, Brunner D, Schreiner PJ, Xie XY, Reid CL, Ruth K, et al. Demographics and correlates of five-year change in echocardiographic left ventricular mass in young black and white adult men and women: The Coronary Artery Risk Development in Young Adults (CARDIA) study. Journal of the American College of Cardiology 2002;40(3):529-535.	E	TA												X
1430	Gardner DS, Lea RG, Sinclair KD. Developmental programming of reproduction and fertility: what is the evidence? Animal 2008;2(8):1128-1134.	E	TA												X
1431	Gardner DSL, Metcalf BS, Hosking J, Jeffery AN, Voss LD, Wilkin TJ. Trends, associations and predictions of insulin resistance in prepubertal children (EarlyBird 29). Pediatric Diabetes 2008;9(3 PART 1):214-220.	E	TA												X
1432	Garg N, Moorthy N, Kapoor A, Tewari S, Kumar S, Sinha A, et al. Hemoglobin A1c in nondiabetic patients: An independent predictor of coronary artery disease and its severity. Mayo Clinic Proceedings 2014;89(7):908-916.	E	TA												X
1433	Gariepy J, Salomon J, Denarie N, Laskri F, Megnien JL, Levenson J, et al. Sex and topographic differences in associations between large-artery wall thickness and coronary risk profile in a French working cohort: the AXA Study. Arterioscler Thromb Vasc Biol 1998;18(4):584-90.	E	TA												X
1434	Garnett SP, Cowell CT, Baur LA, Fay RA, Lee J, Coakley J, et al. Abdominal fat and birth size in healthy prepubertal children. Int J Obes Relat Metab Disord 2001;25(11):1667-73.	E	TA												X
1435	Garrett PJ, Sandeman DD, Bass PS. Low birthweight and subsequent hypertension. Journal of Nephrology 1996;9(4):173-178.	E	TA												X
1436	Gašparović H, Ivanković S, Maček JL, Matovinović F, Nedić M, Svetina L, et al. Pretransplant and perioperative predictors of early heart transplantation outcomes. Croatian Medical Journal 2014;55(6):553-561.	E	TA												X
1437	Gasser T, Kneip A, Ziegler P, Molinari L, Prader A, Largo RH. Development and Outcome of Indexes of Obesity in Normal-Children. Annals of Human Biology 1994;21(3):275-286.	E	TA												X
1438	Gastelurrutia P, Pascual-Figal D, Vazquez R, Cygankiewicz I, Grigorian Shamagian L, Puig T, et al. Obesity paradox and risk of sudden death in heart failure: Results from the MUerte Subita en Insuficiencia Cardiaca (MUSIC) Study. American Heart Journal 2011;161(1).	E	TA												X
1439	Gatti A, Pica F, Boccia MTY, De Antoni F, Sabato AF, Volpi A. No Evidence of Family History as a Risk Factor for Herpes Zoster in Patients with Post-Herpetic Neuralgia. Journal of Medical Virology 2010;82(6):1007-1011.	E	TA												X
1440	Gatti D, El Ghoch M, Viapiana O, Ruocco A, Chignola E, Rossini M, et al. Strong relationship between vitamin D status and bone mineral density in anorexia nervosa. Bone 2015;78:212-215.	E	TA												X
1441	Gauthier T, Mazeau S, Dalmay F, Eyraud JL, Catalan C, Marin B, et al. Obesity and cervical ripening failure risk. J Matern Fetal Neonatal Med 2012;25(3):304-7.	E	TA												X
1442	Gautier A, Godbout A, Grosheny C, Tejedor I, Coudert M, Courtillot C, et al. Markers of Recurrence and Long-Term Morbidity in Craniopharyngioma: A Systematic Analysis of 171 Patients. Journal of Clinical Endocrinology & Metabolism 2012;97(4):1258-1267.	E	TA												X
1443	Ge W, Parvez F, Wu F, Islam T, Ahmed A, Shaheen I, et al. Association between anthropometric measures of obesity and subclinical atherosclerosis in Bangladesh. Atherosclerosis 2014;232(1):234-41.	E	TA		X										X	outcome: cIMT
1444	Geelhoed JJ, Fraser A, Tilling K, Benfield L, Davey Smith G, Sattar N, et al. Preeclampsia and gestational hypertension are associated with childhood blood pressure independently of family adiposity measures: the Avon Longitudinal Study of Parents and Children. Circulation 2010;122(12):1192-9.	E	TA												X
1445	Geelhoed JJ, L VANO-G, Verburg BO, Steegers EA, Hofman A, Helbing W, et al. Maternal anthropometrics in pregnancy are associated with left ventricular mass in infancy. The generation R study. Pediatr Res 2008;63(1):62-6.	E	TA												X
1446	Geelhoed JJM, Fraser A, Tilling K, Benfield L, Davey Smith G, Sattar N, et al. Preeclampsia and gestational hypertension are associated with childhood blood pressure independently of family adiposity measures: The Avon longitudinal study of parents and Children. Circulation 2010;122(12):1192-1199.	Duplicate													Duplicate
1447	Geenen MM, Cardous-Ubbink MC, Kremer LCM, Van Den Bos C, Van Der Pal HJH, Heinen RC, et al. Medical assessment of adverse health outcomes in long-term survivors of childhood cancer. Journal of the American Medical Association 2007;297(24):2705-2715.	E	TA												X
1448	Geerts CC, Bots ML, Grobbee DE, Uiterwaal CS. Parental smoking and vascular damage in young adult offspring: is early life exposure critical? The atherosclerosis risk in young adults study. Arterioscler Thromb Vasc Biol 2008;28(12):2296-302.	E	TA												X
1449	Geiser F, Murtz P, Lutterbey G, Traber F, Block W, Imbierowicz K, et al. Magnetic resonance spectroscopic and relaxometric determination of bone marrow changes in anorexia nervosa. Psychosom Med 2001;63(4):631-7.	E	TA												X
1450	Gelfand JM, Mehta NN, Langan SM. Psoriasis and cardiovascular risk: strength in numbers, part II. J Invest Dermatol 2011;131(5):1007-10.	E	TA												X
1451	Geller F, Dempfle A, Gorg T. Genome scan for body mass index and height in the Framingham Heart Study. BMC Genet 2003;4 Suppl 1:S91.	E	TA												X
1452	Geloneck MM, Crowell EL, Wilson EB, Synder BE, Chuang AZ, Baker LA, et al. Correlation between intraocular pressure and body mass index in the seated and supine positions. J Glaucoma 2015;24(2):130-4.	E	TA												X
1453	Gendelman S, Zeft A, Spalding SJ. Childhood-onset Eosinophilic Granulomatosis with Polyangiitis (formerly Churg-Strauss Syndrome): A Contemporary Single-center Cohort. Journal of Rheumatology 2013;40(6):929-935.	E	TA												X
1454	Geng GY. [Serial epidemiological study of hypertension in Tianjin]. Zhonghua Liu Xing Bing Xue Za Zhi 1989;10(2):70-3.	E	TA												X
1455	Genovesi S, Antolini L, Gallieni M, Aiello A, Mandal SK, Doneda A, et al. High prevalence of hypertension in normal and underweight Indian children. J Hypertens 2011;29(2):217-21.	E	TA		X										X
1456	Genuth SM, Backlund JYC, Bayless M, Bluemke DA, Cleary PA, Crandall J, et al. Effects of prior intensive versus conventional therapy and history of glycemia on cardiac function in type 1 diabetes in the DCCT/EDIC. Diabetes 2013;62(10):3561-3569.	E	TA												X
1457	George GC, Hanss-Nuss H, Milani TJ, Freeland-Graves JH. Food choices of low-income women during pregnancy and postpartum. J Am Diet Assoc 2005;105(6):899-907.	E	TA												X
1458	George JA, Venter WDF, Van Deventer HE, Crowther NJ. A Longitudinal Study of the Changes in Body Fat and Metabolic Parameters in a South African Population of HIV-Positive Patients Receiving an Antiretroviral Therapeutic Regimen Containing Stavudine. Aids Research and Human Retroviruses 2009;25(8):771-781.	E	TA												X
1459	George K, Oxborough D, Forster J, Whyte G, Shave R, Dawson E, et al. Mitral annular myocardial velocity assessment of segmental left ventricular diastolic function after prolonged exercise in humans. Journal of Physiology-London 2005;569(1):305-313.	E	TA												X
1460	Gephart MGH, Zygourakis CC, Arrigo RT, Kalanithi PSA, Lad SP, Boakye M. Venous Thromboembolism After Thoracic/Thoracolumbar Spinal Fusion. World Neurosurgery 2012;78(5):545-552.	E	TA												X
1461	Gerber MA, Shapiro ED, Burke GS, Parcells VJ, Bell GL. Lyme disease in children in southeastern Connecticut. New England Journal of Medicine 1996;335(17):1270-1274.	E	TA												X
1462	Geronimus AT, Bound J, Keene D, Hicken M. Black-white differences in age trajectories of hypertension prevalence among adult women and men, 1999-2002. Ethnicity & Disease 2006;16(1):40-48.	E	TA												X
1463	Gesteiro E, Bastida S, Vázquez-Velasco M, Corella D, Guillén M, Ordovas JM, et al. Effects of APOA5 S19W polymorphism on growth, insulin sensitivity and lipoproteins in normoweight neonates. European Journal of Pediatrics 2011;170(12):1551-1558.	E	TA												X
1464	Ghasemi A, Zahediasl S, Azizi F. Reference values for serum nitric oxide metabolites in pediatrics. Nitric Oxide 2010;23(4):264-8.	E	TA												X
1465	Ghate SR, Porucznik CA, Said Q, Hashibe M, Joy E, Brixner DI. Predictors of metabolic parameter monitoring in adolescents on antipsychotics in a primary care setting. Mental Health in Family Medicine 2012;9(3):137-148.	E	TA												X
1466	Ghayour-Mobarhan M, Shapouri-Moghaddam A, Azimi-Nezhad M, Esmaeili H, Parizadeh SM, Safarian M, et al. The relationship between established coronary risk factors and serum copper and zinc concentrations in a large Persian cohort. J Trace Elem Med Biol 2009;23(3):167-75.	E	TA												X
1467	Ghosh A. Anthropometric and body composition characteristics during pregnancy: a study from West Bengal, India. Homo 2012;63(3):233-40.	E	TA												X
1468	Gianni ML, Roggero P, Piemontese P, Morlacchi L, Bracco B, Taroni F, et al. Boys who are born preterm show a relative lack of fat-free mass at 5 years of age compared to their peers. Acta Paediatrica 2015;104(3):E119-E123.	E	TA												X
1469	Giannini C, Caprio S. Progression of β-Cell Dysfunction in Obese youth. Current Diabetes Reports 2013;13(1):89-95.	E	TA												X
1470	Giannini C, Feldstein AE, Santoro N, Kim G, Kursawe R, Pierpont B, et al. Circulating levels of FGF-21 in obese youth: associations with liver fat content and markers of liver damage. J Clin Endocrinol Metab 2013;98(7):2993-3000.	E	TA												X
1471	Giannini C, Mohn A, Chiarelli F. Physical exercise and diabetes during childhood. Acta Biomed 2006;77 Suppl 1:18-25.	E	TA												X
1472	Gibson K, Meissner M, Wright D. Great saphenous vein diameter does not correlate with worsening quality of life scores in patients with great saphenous vein incompetence. J Vasc Surg 2012;56(6):1634-41.	E	TA												X
1473	Gidding SS, Liu K, Colangelo LA, Cook NL, Goff DC, Glasser SP, et al. Longitudinal determinants of left ventricular mass and geometry: the Coronary Artery Risk Development in Young Adults (CARDIA) Study. Circ Cardiovasc Imaging 2013;6(5):769-75.	E	TA												X
1474	Gidding SS, McMahan A, McGill HC, Colangelo LA, Schreiner PJ, Williams OD, et al. Prediction of coronary artery calcium in young adults using the Pathobiological Determinants of Atherosclerosis in Youth (PDAY) risk score - The CARDIA study. Archives of Internal Medicine 2006;166(21):2341-2347.	E	TA												X
1475	Gidding SS, Nehgme R, Heise C, Muscar C, Linton A, Hassink S. Severe obesity associated with cardiovascular deconditioning, high prevalence of cardiovascular risk factors, diabetes mellitus/hyperinsulinemia, and respiratory compromise. Journal of Pediatrics 2004;144(6):766-769.	E	TA		X										X
1476	Gidding SS, Palermo RA, Deloach SS, Keith SW, Falkner B. Associations of cardiac structure with obesity, blood pressure, inflammation, and insulin resistance in african-american adolescents. Pediatric Cardiology 2014;35(2):307-314.	E	TA												X
1477	Gietema JA, Sleijfer DT, Willemse PH, Schraffordt Koops H, van Ittersum E, Verschuren WM, et al. Long-term follow-up of cardiovascular risk factors in patients given chemotherapy for disseminated nonseminomatous testicular cancer. Ann Intern Med 1992;116(9):709-15.	E	TA												X
1478	Gigante DP, Rasmussen KM, Victora CG. Pregnancy increase BMI in adolescents of a population-based birth cohort. Journal of Nutrition 2005;135(1):74-80.	E	TA												X
1479	Giggey PP, Wendell CR, Zonderman AB, Waldstein SR. Greater coffee intake in men is associated with steeper age-related increases in blood pressure. Am J Hypertens 2011;24(3):310-5.	E	TA												X
1480	Gilardini L, Parati G, Sartorio A, Mazzilli G, Pontiggia B, Invitti C. Sympathoadrenergic and metabolic factors are involved in ambulatory blood pressure rise in childhood obesity. Journal of Human Hypertension 2008;22(2):75-82.	E	TA												X
1481	Gilardini L, Pasqualinotto L, Di Matteo S, Caffetto K, Croci M, Girola A, et al. Factors associated with early atherosclerosis and arterial calcifications in young subjects with a benign phenotype of obesity. Obesity 2011;19(8):1684-1689.	E	TA												X
1482	Gilhotra Y, Willis F. Blood pressure measurements on children in the emergency department. Emerg Med Australas 2006;18(2):148-54.	E	TA												X
1483	Gill G, Gebrekidan A, English P, Wile D, Tesfaye S. Diabetic complications and glycaemic control in remote North Africa. QJM 2008;101(10):793-8.	E	TA												X
1484	Gillebert C, Vandeyk K, Troost E, Gewillig M, Budts W. Mid-term outcome of patients with Kawasaki disease, single-centre experience. Acta Cardiologica 2010;65(3):291-295.	E	TA												X
1485	Gillis D, Krishnamohan A, Yaacov B, Shaag A, Jackman JE, Elpeleg O. TRMT10A dysfunction is associated with abnormalities in glucose homeostasis, short stature and microcephaly. Journal of Medical Genetics 2014;51(9):573-580.	E	TA												X
1486	Gillman MW, Kleinman K. Invited commentary: Antecedents of obesity - Analysis, interpretation, and use of longitudinal data. American Journal of Epidemiology 2007;166(1):14-16.	E	F												X		Good for lit review
1487	Gillum MP, Kotas ME, Erion DM, Kursawe R, Chatterjee P, Nead KT, et al. SirT1 regulates adipose tissue inflammation. Diabetes 2011;60(12):3235-3245.	E	TA												X
1488	Gillum RF. The association of the ratio of waist to hip girth with blood pressure, serum cholesterol and serum uric acid in children and youths aged 6-17 years. J Chronic Dis 1987;40(5):413-20.	E	TA		X										X
1489	Gillum RF, Taylor HL, Anderson J, Blackburn H. Longitudinal study (32 years) of exercise tolerance, breathing response, blood pressure, and blood lipids in young men. Arteriosclerosis 1981;1(6):455-62.	E	TA												X
1490	Gingras V, Vigneault J, Weisnagel SJ, Tchernof A, Robitaille J. Accelerometry-measured physical activity and inflammation after gestational diabetes. Med Sci Sports Exerc 2013;45(7):1307-12.	E	TA												X
1491	Ginsberg-Fellner F, Knittle JL. Weight reduction in young obese children. I. Effects on adipose tissue cellularity and metabolism. Pediatr Res 1981;15(10):1381-9.	E	TA												X
1492	Giouleka P, Papatheodorou G, Lyberopoulos P, Karakatsani A, Alchanatis M, Roussos C, et al. Body mass index is associated with leukotriene inflammation in asthmatics. Eur J Clin Invest 2011;41(1):30-8.	E	TA												X
1493	Giri N, Batista DL, Alter BP, Stratakis CA. Endocrine abnormalities in patients with Fanconi anemia. J Clin Endocrinol Metab 2007;92(7):2624-31.	E	TA												X
1494	Girolami A, Tasinato V, Sambado L, Peroni E, Casonato A. Venous thrombosis in von Willebrand disease as observed in one centre and as reported in the literature. Blood Coagulation and Fibrinolysis 2015;26(1):54-58.	E	TA												X
1495	Gishti O, Gaillard R, Felix JF, Bouthoorn S, Steegers E, Raat H, et al. Early origins of ethnic disparities in cardiovascular risk factors. Preventive Medicine 2015;76:84-91.	E	TA												X
1496	Gishti O, Jaddoe VW, Felix JF, Reiss I, Hofman A, Ikram MK, et al. Influence of maternal angiogenic factors during pregnancy on microvascular structure in school-age children. Hypertension 2015;65(4):722-8.	E	TA												X
1497	Glanton CW, Hypolite IO, Hshieh PB, Agodoa LY, Yuan CM, Abbott KC. Factors associated with improved short term survival in obese end stage renal disease patients. Annals of Epidemiology 2003;13(2):136-143.	E	TA												X
1498	Glasser JL, Caggiula A, Coyne T, Becker DJ, Kuller LH, Orchard TJ. A comparison of dietary intake in individuals with insulin-dependent diabetes mellitus and the current American Diabetes Association nutrient guidelines for fats and cholesterol: The epidemiology of diabetes complications study, Pittsburgh, PA, U.S.A. Diabetes, Nutrition and Metabolism - Clinical and Experimental 1993;6(2):77-85.	E	TA												X
1499	Glasser SP, Lynch AI, Devereux RB, Hopkins P, Arnett DK. Hemodynamic and echocardiographic profiles in African American compared with White offspring of hypertensive parents: the HyperGEN study. Am J Hypertens 2014;27(1):21-6.	E	TA												X
1500	Gleeson HK, Shalet SM. The impact of cancer therapy on the endocrine system in survivors of childhood brain tumours. Endocr Relat Cancer 2004;11(4):589-602.	E	TA												X
1501	Glew RH, Williams M, Conn CA, Cadena SM, Crossey M, Okolo SN, et al. Cardiovascular disease risk factors and diet of Fulani pastoralists of northern Nigeria. Am J Clin Nutr 2001;74(6):730-6.	E	TA												X
1502	Glintborg D, Hass Rubin K, Nybo M, Abrahamsen B, Andersen M. Morbidity and medicine prescriptions in a nationwide Danish population of patients diagnosed with polycystic ovary syndrome. Eur J Endocrinol 2015;172(5):627-38.	E	TA												X
1503	Glintborg D, Mumm H, Ravn P, Andersen M. Age associated differences in prevalence of individual rotterdam criteria and metabolic risk factors during reproductive age in 446 caucasian women with polycystic ovary syndrome. Horm Metab Res 2012;44(9):694-8.	E	TA												X
1504	Glowinska B, Urban M, Koput A, Galar M. New atherosclerosis risk factors in obese, hypertensive and diabetic children and adolescents. Atherosclerosis 2003;167(2):275-86.	E	TA		X										X
1505	Glowinska-Olszewska B, Urban M, Peczynska J, Koput A. [hsCRP protein in children and adolescents with diabetes type 1]. Pediatr Endocrinol Diabetes Metab 2007;13(2):79-84.	E	TA												X
1506	Glueck CJ, Mellies MJ, Srivastava L, Knowles HC, Jr., Fallat RW, Tsang RC, et al. Insulin, obesity, and triglyceride interrelationships in sixteen children with familial hypertriglyceridemia. Pediatr Res 1977;11(1 Pt 1):13-9.	E	TA												X
1507	Glueck CJ, Moreira A, Goldenberg N, Sieve L, Wang P. Pioglitazone and metformin in obese women with polycystic ovary syndrome not optimally responsive to metformin. Hum Reprod 2003;18(8):1618-25.	E	TA												X
1508	Glueck CJ, Wang P, Fontaine R, Tracy T, Sieve-Smith L. Metformin to restore normal menses in oligo-amenorrheic teenage girls with polycystic ovary syndrome (PCOS). Journal of Adolescent Health 2001;29(3):160-169.	E	TA												X
1509	Godfrey K, Robinson S, Barker DJ, Osmond C, Cox V. Maternal nutrition in early and late pregnancy in relation to placental and fetal growth. BMJ 1996;312(7028):410-4.	E	TA												X
1510	Godoy GAF, Korevaar TIM, Peeters RP, Hofman A, De Rijke YB, Bongers-Schokking JJ, et al. Maternal thyroid hormones during pregnancy, childhood adiposity and cardiovascular risk factors: The Generation R Study. Clinical Endocrinology 2014;81(1):117-125.	E	TA												X
1511	Goedhart G, Snijders AC, Hesselink AE, van Poppel MN, Bonsel GJ, Vrijkotte TG. Maternal depressive symptoms in relation to perinatal mortality and morbidity: results from a large multiethnic cohort study. Psychosom Med 2010;72(8):769-76.	E	TA												X
1512	Goff DC, Jr., Gillespie C, Howard G, Labarthe DR. Is the obesity epidemic reversing favorable trends in blood pressure? Evidence from cohorts born between 1890 and 1990 in the United States. Ann Epidemiol 2012;22(8):554-61.	E	TA												X		Important for lit review
1513	Goh KL, Bhaskaran K, Minassian C, Evans SJW, Smeeth L, Douglas IJ. Angiotensin receptor blockers and risk of dementia: cohort study in UK Clinical Practice Research Datalink. British Journal of Clinical Pharmacology 2015;79(2):337-350.	E	TA												X
1514	Goilav B, Kaskel FJ. Chronic Kidney Disease Stages Are Appropriate at All Ages. Blood Purification 2011;31(1-3):125-129.	E	TA												X
1515	Golan S, Patel AR, Eggener SE, Shalhav AL. The Volume of Nonneoplastic Parenchyma in a Minimally Invasive Partial Nephrectomy Specimen: Predictive Factors and Impact on Renal Function. Journal of Endourology 2014;28(2):196-200.	E	TA												X
1516	Golay A. Metformin and body weight. International Journal of Obesity 2008;32(1):61-72.	E	TA												X
1517	Golden SH, Robinson KA, Saldanha I, Anton B, Ladenson PW. Prevalence and incidence of endocrine and metabolic disorders in the united states: A comprehensive review. Journal of Clinical Endocrinology and Metabolism 2009;94(6):1853-1878.	E	TA												X
1518	Goldhaber-Fiebert JD, Rubinfeld RE, Bhattacharya J, Robinson TN, Wise PH. The utility of childhood and adolescent obesity assessment in relation to adult health. Medical Decision Making 2013;33(2):163-175.	E	F												X	The use of different datasets to create predictive models for obesity
1519	Goldman-Mellor S, Brydon L, Steptoe A. Psychological distress and circulating inflammatory markers in healthy young adults. Psychol Med 2010;40(12):2079-87.	E	TA												X
1520	Goldminz AM, Buzney CD, Kim N, Au S-C, Levine DE, Wang AC, et al. Prevalence of the Metabolic Syndrome in Children with Psoriatic Disease. Pediatric Dermatology 2013;30(6):700-705.	E	TA												X
1521	Goldstein BI, Liu SM, Schaffer A, Sala R, Blanco C. Obesity and the three-year longitudinal course of bipolar disorder. Bipolar Disord 2013;15(3):284-93.	E	TA												X
1522	Goletzke J, Buyken AE, Joslowski G, Bolzenius K, Remer T, Carstensen M, et al. Increased Intake of Carbohydrates from Sources with a Higher Glycemic Index and Lower Consumption of Whole Grains during Puberty Are Prospectively Associated with Higher IL-6 Concentrations in Younger Adulthood among Healthy Individuals. Journal of Nutrition 2014;144(10):1586-1593.	E	TA												X
1523	Golley RK, Smithers LG, Mittinty MN, Emmett P, Northstone K, Lynch JW. Diet quality of U.K. infants is associated with dietary, adiposity, cardiovascular, and cognitive outcomes measured at 7-8 years of age. J Nutr 2013;143(10):1611-7.	E	TA												X
1524	Gomes MB, De Mattos Matheus AS, Calliari LE, Luescher JL, Manna TD, Savoldelli RD, et al. Economic status and clinical care in young type 1 diabetes patients: A nationwide multicenter study in Brazil. Acta Diabetologica 2013;50(5):743-752.	E	TA												X
1525	Gomes MB, Negrato CA, Cobas R, Tannus LRM, Gonçalves PR, Da Silva PCB, et al. Determinants of intensive insulin therapeutic regimens in patients with type 1 diabetes: Data from a nationwide multicenter survey in Brazil. Diabetology and Metabolic Syndrome 2014;6(1).	E	TA												X
1526	Gomes RS, Quirino IG, Pereira RM, Vitor BM, Leite AF, Oliveira EA, et al. Primary versus secondary hypertension in children followed up at an outpatient tertiary unit. Pediatric Nephrology 2011;26(3):441-447.	E	TA												X
1527	Gomez Duque M, Enciso Olivera C, Pena Torres E, Segura Duran OD, Nieto Estrada VH. [ECAIS study: inadvertent cardiovascular adverse events in sepsis]. Med Intensiva 2012;36(5):343-50.	E	TA												X
1528	Gomez-Ambrosi J, Silva C, Catalan V, Rodriguez A, Carlos Galofre J, Escalada J, et al. Clinical Usefulness of a New Equation for Estimating Body Fat. Diabetes Care 2012;35(2):383-388.	E	TA												X
1529	Gómez-Casanovas E, Sanmartí R, Solé M, Cañete JD, Muñoz-Gómez J. The clinical significance of amyloid fat deposits in rheumatoid arthritis: A systematic long-term followup study using abdominal fat aspiration. Arthritis and Rheumatism 2001;44(1):66-72.	E	TA												X
1530	Gomez-Garcia A, Rangel-Garcia L, Alvarez-Aguilar C. [A cross-sectional study to assess cardiovascular risk in the children of parents with diabetes mellitus or arterial hypertension]. Semergen 2012;38(5):278-84.	E	TA												X
1531	Goncalves JP, Oliveira A, Severo M, Santos AC, Lopes C. Cross-sectional and longitudinal associations between serum uric acid and metabolic syndrome. Endocrine 2012;41(3):450-7.	E	TA												X
1532	Gonzalez Centeno A, Nahum Hernandez P, Mendoza R, Ayala AR. [Correlation between menstruation disorders and insulin resistance]. Ginecol Obstet Mex 2003;71:312-7.	E	TA												X
1533	Gonzalez DA, Nazmi A, Victora CG. Growth from birth to adulthood and abdominal obesity in a Brazilian birth cohort. Int J Obes (Lond) 2010;34(1):195-202.	E	F												X		Important
1534	González E, Gutiérrez E, Morales E, Hernández E, Andres A, Bello I, et al. Factors influencing the progression of renal damage in patients with unilateral renal agenesis and remnant kidney. Kidney International 2005;68(1):263-270.	E	TA												X
1535	Gonzalez LA, Pons-Estel GJ, Zhang J, Vila LM, Reveille JD, Alarcon GS. Time to neuropsychiatric damage occurrence in LUMINA (LXVI): a multi-ethnic lupus cohort. Lupus 2009;18(9):822-830.	E	TA												X
1536	Gonzalez-Molero I, Rojo-Martinez G, Morcillo S, Gutierrez C, Rubio E, Perez-Valero V, et al. Hypovitaminosis D and incidence of obesity: a prospective study. Eur J Clin Nutr 2013;67(6):680-2.	E	TA												X
1537	Gonzalez-Suarez CB, Grimmer-Somers K. The association of physical activity and physical fitness with pre-adolescent obesity: an observational study in Metromanila, Philippines. J Phys Act Health 2011;8(6):804-10.	E	TA												X
1538	Gooding HC, de Ferranti SD. Cardiovascular risk assessment and cholesterol management in adolescents: getting to the heart of the matter. Curr Opin Pediatr 2010;22(4):398-404.	E	TA												X
1539	Gooding HC, McGinty S, Richmond TK, Gillman MW, Field AE. Hypertension awareness and control among young adults in the national longitudinal study of adolescent health. J Gen Intern Med 2014;29(8):1098-104.	E	TA												X
1540	Goodman E, Daniels SR, Morrison JA, Huang B, Dolan LM. Contrasting prevalence of and demographic disparities in the World Health Organization and National Cholesterol Education Program Adult Treatment Panel III definitions of metabolic syndrome among adolescents. J Pediatr 2004;145(4):445-51.	E	TA												X
1541	Goodman E, Graham TE, Dolan LM, Daniels SR, Goodman ER, Kahn BB. The Relationship of Retinol Binding Protein 4 to Changes in Insulin Resistance and Cardiometabolic Risk in Overweight Black Adolescents. Journal of Pediatrics 2009;154(1):67-73.e1.	E	TA												X
1542	Goodman E, Li C, Tu Y-K, Ford E, Sun SS, Huang TTK. Stability of the factor structure of the metabolic syndrome across pubertal development: confirmatory factor analyses of three alternative models. The Journal of pediatrics 2009;155(3):S5.e1-8.	E	TA												X
1543	Goodman E, Must A, Daniels SR, Dolan LM. Hostility and adiposity mediate disparities in insulin resistance among adolescents and young adults. J Pediatr 2010;157(4):572-7, 577 e1.	E	TA												X
1544	Goodman M, LaKind JS, Mattison DR. Do phthalates act as obesogens in humans? A systematic review of the epidemiological literature. Critical Reviews in Toxicology 2014;44(2):151-175.	E	TA												X
1545	Goodwin AF, Oberoi S, Landan M, Charles C, Groth J, Martinez A, et al. Craniofacial and dental development in cardio-facio-cutaneous syndrome: the importance of Ras signaling homeostasis. Clinical Genetics 2013;83(6):539-544.	E	TA												X
1546	Gooren LJ, van Trotsenburg MAA, Giltay EJ, van Diest PJ. Breast Cancer Development in Transsexual Subjects Receiving Cross-Sex Hormone Treatment. Journal of Sexual Medicine 2013;10(12):3129-3134.	E	TA												X
1547	Gopinath B, Baur LA, Teber E, Liew G, Wong TY, Mitchell P. Effect of obesity on retinal vascular structure in pre-adolescent children. Int J Pediatr Obes 2011;6(2-2):e353-9.	E	TA												X
1548	Gordon-Dseagu VLZ, Shelton N, Mindell J. Diabetes mellitus and mortality from all-causes, cancer, cardiovascular and respiratory disease: Evidence from the Health Survey for England and Scottish Health Survey cohorts. Journal of Diabetes and its Complications 2014;28(6):791-797.	E	TA												X
1549	Gore M, Tai KS, Chandran A, Zlateva G, Leslie D. Clinical comorbidities, treatment patterns, and healthcare costs among patients with fibromyalgia newly prescribed pregabalin or duloxetine in usual care. Journal of Medical Economics 2012;15(1):19-31.	E	TA												X
1550	Gorgey AS, Dudley GA. Skeletal muscle atrophy and increased intramuscular fat after incomplete spinal cord injury. Spinal Cord 2007;45(4):304-309.	E	TA												X
1551	Gossell-Williams M, Martin J, Neita S, Gibson RC, Abel W, Sewell C, et al. Prevalence of the metabolic syndrome in patients presenting to the university hospital of the West Indies: a need to adopt proactive screening and specific management policy. West Indian Med J 2012;61(8):802-8.	E	TA												X
1552	Gottfredsson M, Reynisson IK, Ingvarsson RF, Kristjansdottir H, Nardini MV, Sigurdsson JF, et al. Comparative Long-term Adverse Effects Elicited by Invasive Group B and C Meningococcal Infections. Clinical Infectious Diseases 2011;53(9):E117-E124.	E	TA												X
1553	Gould Rothberg BE, Magriples U, Kershaw TS, Rising SS, Ickovics JR. Gestational weight gain and subsequent postpartum weight loss among young, low-income, ethnic minority women. Am J Obstet Gynecol 2011;204(1):52 e1-11.	E	TA												X
1554	Grandi C, Dipierri J, Luchtenberg G, Moresco A, Alfaro E. [Effect of high altitude on birth weight and adverse perinatal outcomes in two Argentine populations]. Rev Fac Cien Med Univ Nac Cordoba 2013;70(2):55-62.	E	TA												X
1555	Grandy S, Chapman RH, Fox KM. Quality of life and depression of people living with type 2 diabetes mellitus and those at low and high risk for type 2 diabetes: findings from the Study to Help Improve Early evaluation and management of risk factors Leading to Diabetes (SHIELD). Int J Clin Pract 2008;62(4):562-8.	E	TA												X
1556	Grant JF, Taylor AW, Ruffin RE, Wilson DH, Phillips PJ, Adams RJT, et al. Cohort profile: The North West Adelaide Health Study (NWAHS). International Journal of Epidemiology 2008;38(6):1479-1486.	E	TA												X
1557	Grant R, Bilgin A, Zeuschner C, Guy T, Pearce R, Hokin B, et al. The relative impact of a vegetable-rich diet on key markers of health in a cohort of Australian adolescents. Asia Pac J Clin Nutr 2008;17(1):107-15.	E	TA												X
1558	Grant T, Soriano Y, Marantz PR, Nelson I, Williams E, Ramirez D, et al. Community-based screening for cardiovascular disease and diabetes using HbA1c. American Journal of Preventive Medicine 2004;26(4):271-275.	E	TA												X
1560	Gray L, Hart CL, Smith GD, Batty GD. What is the predictive value of established risk factors for total and cardiovascular disease mortality when measured before middle age? Pooled analyses of two prospective cohort studies from Scotland. Eur J Cardiovasc Prev Rehabil 2010;17(1):106-12.	E	TA												X
1561	Gray L, Lee IM, Sesso HD, Batty GD. Blood Pressure in Early Adulthood, Hypertension in Middle Age, and Future Cardiovascular Disease Mortality: HAHS (Harvard Alumni Health Study). Journal of the American College of Cardiology 2011;58(23):2396-2403.	E	TA												X
1562	Gray LJ, Barros H, Raposo L, Khunti K, Davies MJ, Santos AC. The development and validation of the Portuguese risk score for detecting type 2 diabetes and impaired fasting glucose. Primary Care Diabetes 2013;7(1):11-18.	E	TA												X
1563	Grayson PC, Cuthbertson D, Carette S, Hoffman GS, Khalidi NA, Koening CL, et al. New Features of Disease After Diagnosis in 6 Forms of Systemic Vasculitis. Journal of Rheumatology 2013;40(11):1905-1912.	E	TA												X
1564	Grayson PC, Maksimowicz-McKinnon K, Clark TM, Tomasson G, Cuthbertson D, Carette S, et al. Distribution of arterial lesions in Takayasu's arteritis and giant cell arteritis. Annals of the Rheumatic Diseases 2012;71(8):1329-1334.	E	TA												X
1565	Greenlund KJ, Valdez R, Bao W, Wattigney WA, Srinivasan SR, Berenson GS. Verification of parental history of coronary artery disease and associations with adult offspring risk factors in a community sample: the Bogalusa Heart Study. Am J Med Sci 1997;313(4):220-7.	E	TA												X
1566	Greenway FL, Dunayevich E, Tollefson G, Erickson J, Guttadauria M, Fujioka K, et al. Comparison of combined bupropion and naltrexone therapy for obesity with monotherapy and placebo. J Clin Endocrinol Metab 2009;94(12):4898-906.	E	TA												X
1567	Gregg EW, Gerzoff RB, Caspersen CJ, Williamson DF, Narayan KM. Relationship of walking to mortality among US adults with diabetes. Arch Intern Med 2003;163(12):1440-7.	E	TA												X
1568	Grieger JA, Grzeskowiak LE, Clifton VL. Preconception dietary patterns in human pregnancies are associated with preterm delivery. Journal of Nutrition 2014;144(7):1075-1080.	E	TA												X
1569	Griffiths PL, Sheppard ZA, Johnson W, Cameron N, Pettifor JM, Norris SA. Associations between household and neighbourhood socioeconomic status and systolic blood pressure among urban South African adolescents. J Biosoc Sci 2012;44(4):433-58.	E	TA												X
1570	Grijalva-Eternod CS, Lawlor DA, Wells JC. Testing a capacity-load model for hypertension: disentangling early and late growth effects on childhood blood pressure in a prospective birth cohort. PLoS One 2013;8(2):e56078.	E	F												X	No adult data. FU: birth to 7 years to 9 years
1571	Grill E, Stucki G. Criteria for Validating Comprehensive Icf Core Sets and Developing Brief Icf Core Set Versions. Journal of Rehabilitation Medicine 2011;43(2, Sp. Iss. SI):87-91.	E	TA												X
1572	Grisaru S, Yuen GWH, Miettunen PM, Hamiwka LA. Incidence of Wegener's Granulomatosis in Children. Journal of Rheumatology 2010;37(2):440-442.	E	TA												X
1573	Groh WJ, Groh MR, Shen C, Monckton DG, Bodkin CL, Pascuzzi RM. Survival and Ctg Repeat Expansion in Adults with Myotonic Dystrophy Type 1. Muscle & Nerve 2011;43(5):648-651.	E	TA												X
1574	Gronich N, Lavi I, Rennert G. Higher risk of venous thrombosis associated with drospirenone-containing oral contraceptives: A population-based cohort study. CMAJ 2011;183(18):E1319-E1325.	E	TA												X
1575	Gronroos P, Raitakari OT, Kahonen M, Hutri-Kahonen N, Marniemi J, Viikari J, et al. Association of high sensitive C-reactive protein with apolipoprotein E polymorphism in children and young adults: the Cardiovascular Risk in Young Finns Study. Clin Chem Lab Med 2008;46(2):179-86.	E	TA												X
1576	Grøntved A, Ried-Larsen M, Møller NC, Kristensen PL, Wedderkopp N, Froberg K, et al. Youth screen-time behaviour is associated with cardiovascular risk in young adulthood: The European Youth Heart Study. European Journal of Preventive Cardiology 2014;21(1):49-56.	E	TA												X
1577	Gross M, Steffes M, Jacobs DR, Jr., Yu X, Lewis L, Lewis CE, et al. Plasma F2-isoprostanes and coronary artery calcification: the CARDIA Study. Clin Chem 2005;51(1):125-31.	E	TA												X
1578	Gross M, Yu XH, Hannan P, Prouty C, Jacobs DR. Lipid standardization of serum fat-soluble antioxidant concentrations: the YALTA study. American Journal of Clinical Nutrition 2003;77(2):458-466.	E	TA												X
1579	Grossman A, Grossman C, Barenboim E, Azaria B, Goldstein L, Grossman E. Pre-hypertension as a predictor of hypertension in military aviators: A longitudinal study of 367 men. Aviation Space and Environmental Medicine 2006;77(11):1162-1165.	E	TA												X
1580	Grossman A, Prokupetz A, Gordon B, Morag-Koren N, Grossman E. Inter-arm blood pressure differences in young, healthy patients. J Clin Hypertens (Greenwich) 2013;15(8):575-8.	E	TA												X
1581	Grossman D, White K, Hopkins K, Amastae J, Shedlin M, Potter JE. Contraindications to combined oral contraceptives among over-the-counter compared with prescription users. Obstet Gynecol 2011;117(3):558-65.	E	TA												X
1582	Grosso G, Mistretta A, Frigiola A, Gruttadauria S, Biondi A, Basile F, et al. Mediterranean Diet and Cardiovascular Risk Factors: A Systematic Review. Critical Reviews in Food Science and Nutrition 2014;54(5):593-610.	E	TA												X
1583	Grugni G, Crino A, Bedogni G, Cappa M, Sartorio A, Corrias A, et al. Metabolic syndrome in adult patients with Prader-Willi syndrome. Nutr Metab Cardiovasc Dis 2013;23(11):1134-40.	E	TA												X
1584	Grunwell JR, McCracken C, Fortenberry J, Stockwell J, Kamat P. Risk factors leading to failed procedural sedation in children outside the operating room. Pediatr Emerg Care 2014;30(6):381-7.	E	TA												X
1585	Gruszfeld D, Socha P. Early nutrition and health: short- and long-term outcomes. World Rev Nutr Diet 2013;108:32-9.	E	TA												X
1586	Gualdiero P, Niebauer J, Addison C, Clark SJ, Coats AJS. Clinical features, anthropometric characteristics, and racial influences on the 'white-coat effect' in a single-centre cohort of 1553 consecutive subjects undergoing routine ambulatory blood pressure monitoring. Blood Pressure Monitoring 2000;5(2):53-57.	E	TA												X
1587	Gudipati S, Fragkakis EM, Ciriello V, Harrison SJ, Stavrou PZ, Kanakaris NK, et al. A cohort study on the incidence and outcome of pulmonary embolism in trauma and orthopedic patients. BMC Med 2014;12:39.	E	TA												X
1588	Gueguen R, Visvikis S, Steinmetz J, Siest G, Boerwinkle E. An analysis of genotype effects and their interactions by using the apolipoprotein E polymorphism and longitudinal data. Am J Hum Genet 1989;45(5):793-802.	E	TA												X
1589	Gueguen S, Leroy P, Gueguen R, Siest G, Visvikis S, Herbeth B. Genetic and environmental contributions to serum retinol and alpha-tocopherol concentrations: the Stanislas Family Study. Am J Clin Nutr 2005;81(5):1034-44.	E	TA												X
1590	Guénard F, Deshaies Y, Cianflone K, Kral JG, Marceau P, Vohl MC. Differential methylation in glucoregulatory genes of offspring born before vs. after maternal gastrointestinal bypass surgery. Proceedings of the National Academy of Sciences of the United States of America 2013;110(28):11439-11444.	E	TA												X
1591	Guenard F, Tchernof A, Deshaies Y, Cianflone K, Kral JG, Marceau P, et al. Methylation and expression of immune and inflammatory genes in the offspring of bariatric bypass surgery patients. Journal of obesity 2013;2013:492170-492170.	E	TA												X
1592	Gueneau L, Bertrand AT, Jais J-P, Salih MA, Stojkovic T, Wehnert M, et al. Mutations of the FHL1 Gene Cause Emery-Dreifuss Muscular Dystrophy. American Journal of Human Genetics 2009;85(3):338-353.	E	TA												X
1593	Guex JJ, Avril L, Enrici E, Enriquez E, Lis C, Taieb C. Quality of life improvement in Latin American patients suffering from chronic venous disorder using a combination of Ruscus aculeatus and hesperidin methyl-chalcone and ascorbic acid (quality study). International Angiology 2010;29(6):525-532.	E	TA												X
1594	Guglin M, Kolli S, Chen R. Determinants of pulmonary hypertension in young adults. Int J Clin Pract Suppl 2012(177):13-9.	E	F		X										X
1595	Guill S, Hargens T, Nickols-Richardson S, Bassaganya-Riera J, Miller L, Zedalis D, et al. Early evidence of increased risk for metabolic syndrome in young men with latent obstructive sleep apnea. Metab Syndr Relat Disord 2010;8(1):33-8.	E	TA												X
1596	Guillaume M, Lapidus L, Lambert A. Differences in associations of familial and nutritional factors with serum lipids between boys and girls: the Luxembourg Child Study. Am J Clin Nutr 2000;72(2):384-8.	E	TA												X
1597	Guillaume M, Lapidus L, Lambert A, Björntorp P. Socioeconomic and psychosocial conditions of parents and cardiovascular risk factors in their children: The Belgian Luxembourg Child Study III. Acta Paediatrica, International Journal of Paediatrics 1999;88(8):866-873.	E	TA												X
1598	Guillemette L, Lacroix M, Battista M-C, Doyon M, Moreau J, Menard J, et al. TNF alpha Dynamics During the Oral Glucose Tolerance Test Vary According to the Level of Insulin Resistance in Pregnant Women. Journal of Clinical Endocrinology & Metabolism 2014;99(5):1862-1869.	E	TA												X
1599	Guízar-Mendoza JM, Amador-Licona N, Lozada EE, Rodriguez L, Gutiérrez-Navarro M, Dubey-Ortega LA, et al. Left ventricular mass and heart sympathetic activity after renal transplantation in children and young adults. Pediatric Nephrology 2006;21(10):1413-1418.	E	TA												X
1600	Guize L, Benetos A, Thomas F, Malmejac A, Ducimetiere P. [Cholesterolemia and total, cardiovascular and cancer mortality. Study of a cohort of 220,000 people]. Bull Acad Natl Med 1998;182(3):631-47; discussion 647-50.	E	TA												X
1601	Gunderson EP, Abrams B, Selvin S. Does the pattern of postpartum weight change differ according to pregravid body size? Int J Obes Relat Metab Disord 2001;25(6):853-62.	E	TA												X
1602	Gunderson EP, Chiang V, Lewis CE, Catov J, Quesenberry CP, Jr., Sidney S, et al. Long-term blood pressure changes measured from before to after pregnancy relative to nonparous women. Obstet Gynecol 2008;112(6):1294-302.	E	TA												X
1603	Gunderson EP, Chiang V, Pletcher MJ, Jacobs DR, Quesenberry CP, Sidney S, et al. History of gestational diabetes mellitus and future risk of atherosclerosis in mid-life: the Coronary Artery Risk Development in Young Adults study. J Am Heart Assoc 2014;3(2):e000490.	E	TA												X
1604	Gunderson EP, Jacobs DR, Jr., Chiang V, Lewis CE, Feng J, Quesenberry CP, Jr., et al. Duration of lactation and incidence of the metabolic syndrome in women of reproductive age according to gestational diabetes mellitus status: a 20-Year prospective study in CARDIA (Coronary Artery Risk Development in Young Adults). Diabetes 2010;59(2):495-504.	E	TA												X
1605	Gunderson EP, Jacobs DR, Jr., Chiang V, Lewis CE, Tsai A, Quesenberry CP, Jr., et al. Childbearing is associated with higher incidence of the metabolic syndrome among women of reproductive age controlling for measurements before pregnancy: the CARDIA study. Am J Obstet Gynecol 2009;201(2):177 e1-9.	E	TA												X
1606	Gunderson EP, Lewis CE, Murtaugh MA, Quesenberry CP, Smith West D, Sidney S. Long-term plasma lipid changes associated with a first birth: the Coronary Artery Risk Development in Young Adults study. Am J Epidemiol 2004;159(11):1028-39.	E	TA												X
1607	Gunderson EP, Lewis CE, Tsai A-L, Chiang V, Carnethon M, Quesenberry CP, Jr., et al. A 20-year prospective study of childbearing and incidence of diabetes in young women, controlling for glycemia before conception - The Coronary Artery Risk Development in Young Adults (CARDIA) Study. Diabetes 2007;56(12):2990-2996.	E	TA												X
1608	Gunderson EP, Quesenberry CP, Jr., Jacobs DR, Jr., Feng J, Lewis CE, Sidney S. Longitudinal study of prepregnancy cardiometabolic risk factors and subsequent risk of gestational diabetes mellitus: The CARDIA study. Am J Epidemiol 2010;172(10):1131-43.	E	TA												X
1609	Gunderson EP, Schreiber G, Striegel-Moore R, Hudes M, Daniels S, Biro FM, et al. Pregnancy during adolescence has lasting adverse effects on blood lipids: a 10-year longitudinal study of black and white females. J Clin Lipidol 2012;6(2):139-49.	E	TA												X
1610	Gunnarsdottir J, Stephansson O, Cnattingius S, Akerud H, Wikstrom A-K. Risk of placental dysfunction disorders after prior miscarriages: a population-based study. American Journal of Obstetrics and Gynecology 2014;211(1).	E	TA												X
1611	Gunnell D, Berney L, Holland P, Maynard M, Blane D, Frankel S, et al. How accurately are height, weight and leg length reported by the elderly, and how closely are they related to measurements recorded in childhood? Int J Epidemiol 2000;29(3):456-64.	E	F												X		Bias in self reported BMI
1612	Gunnell DJ, Frankel SJ, Nanchahal K, Peters TJ, Davey Smith G. Childhood obesity and adult cardiovascular mortality: a 57-y follow-up study based on the Boyd Orr cohort. Am J Clin Nutr 1998;67(6):1111-8.	E	F												X	Outcome: Mortality
1613	Gunnell DJ, Smith GD. Weight, weight gain and coronary heart disease mortality. European Heart Journal 1999;20(4):246-248.	E	F												X	Outcome: Mortality
1614	Günther ALB, Liese AD, Bell RA, Dabelea D, Lawrence JM, Rodriguez BL, et al. Association between the dietary approaches to hypertension diet and hypertension in youth with diabetes mellitus. Hypertension 2009;53(1):6-12.	E	TA												X
1615	Gunther CW, Lyle RM, Legowski PA, James JM, McCabe LD, McCabe GP, et al. Fat oxidation and its relation to serum parathyroid hormone in young women enrolled in a 1-y dairy calcium intervention. American Journal of Clinical Nutrition 2005;82(6):1228-1234.	E	TA												X
1616	Guo F, Moellering DR, Garvey WT. The progression of cardiometabolic disease: validation of a new cardiometabolic disease staging system applicable to obesity. Obesity (Silver Spring) 2014;22(1):110-8.	E	TA												X
1617	Guo JJ, Patel NC, Li H, Keck Jr PE. Prevalence of treated bipolar disorders and associated comorbidities in managed care and medicaid populations. American Health and Drug Benefits 2010;3(3):171-178.	E	TA												X
1618	Guo S, Salisbury S, Roche AF, Chumlea WC, Siervogel RM. Cardiovascular disease risk factors and body composition: A review. Nutrition Research 1994;14(11):1721-1777.	E	Title	X											X
1619	Guo SM, Chi E, Wisemandle W, Chumlea WC, Roche AF, Siervogel RM. Serial changes in blood pressure from childhood into young adulthood for females in relation to body mass index and maturational age. American Journal of Human Biology 1998;10(5):589-598.	E	Full												X	Exposure: Change in BMI
1620	Guo SM, Salisbury S, Roche AF, Chumlea WC, Siervogel RM. Cardiovascular-Disease Risk-Factors and Body-Composition - a Review. Nutrition Research 1994;14(11):1721-1777.	Duplicate													Duplicate
1621	Gupta R, Bhangoo A, Matthews NAV, Anhalt H, Matta Y, Lamichhane B, et al. The prevalence of non-alcoholic fatty liver disease and metabolic syndrome in obese children. Journal of Pediatric Endocrinology and Metabolism 2011;24(11-12):907-911.	E	TA												X		Obesity a disease
1622	Gurol-Urganci I, Cromwell DA, Mahmood TA, van der Meulen JH, Templeton A. A population-based cohort study of the effect of Caesarean section on subsequent fertility. Hum Reprod 2014;29(6):1320-6.	E	TA												X
1623	Gustafson JK, Yanoff LB, Easter BD, Brady SM, Keil MF, Roberts MD, et al. The stability of metabolic syndrome in children and adolescents. J Clin Endocrinol Metab 2009;94(12):4828-34.	E	TA												X
1624	Gustafsson PE, Janlert U, Theorell T, Hammarstrom A. Is body size at birth related to circadian salivary cortisol levels in adulthood? Results from a longitudinal cohort study. Bmc Public Health 2010;10.	E	TA												X
1625	Gustafsson PE, Janlert U, Theorell T, Westerlund H, Hammarstrom A. Fetal and life course origins of serum lipids in mid-adulthood: results from a prospective cohort study. BMC Public Health 2010;10:484.	E	TA												X		Main exposure: SES
1627	Gutin B, Owens S. The influence of physical activity on cardiometabolic biomarkers in youths: a review. Pediatr Exerc Sci 2011;23(2):169-85.	E	TA												X
1628	Guzman JZ, Iatridis JC, Skovrlj B, Cutler HS, Hecht AC, Qureshi SA, et al. Outcomes and Complications of Diabetes Mellitus on Patients Undergoing Degenerative Lumbar Spine Surgery. Spine 2014;39(19):1596-1604.	E	TA												X
1629	Gybel-Brask D, Hogdall E, Johansen J, Christensen IJ, Skibsted L. Serum YKL-40 and uterine artery Doppler -- a prospective cohort study, with focus on preeclampsia and small-for-gestational-age. Acta Obstet Gynecol Scand 2014;93(8):817-24.	E	TA												X
1630	Gyldenløve M, Jensen P, Linneberg A, Thyssen JP, Zachariae C, Hansen PR, et al. Psoriasis and the framingham risk score in a danish hospital cohort. International Journal of Dermatology 2014;53(9):1086-1090.	E	TA												X
1631	Haapaniemi H, Hillbom M, Juvela S. Lifestyle-associated risk factors for acute brain infarction among persons of working age. Stroke 1997;28(1):26-30.	E	TA												X
1632	Haas JS, Fuentes-Afflick E, Stewart AL, Jackson RA, Dean ML, Brawarsky P, et al. Prepregnancy health status and the risk of preterm delivery. Arch Pediatr Adolesc Med 2005;159(1):58-63.	E	TA												X
1633	Hack M, Schluchter M, Cartar L, Rahman M, Cuttler L, Borawski E. Growth of very low birth weight infants to age 20 years. Pediatrics 2003;112(1 Pt 1):e30-8.	E	TA												X
1634	Hadaegh F, Bozorgmanesh MR, Ghasemi A, Harati H, Saadat N, Azizi F. High prevalence of undiagnosed diabetes and abnormal glucose tolerance in the Iranian urban population: Tehran Lipid and Glucose Study. BMC Public Health 2008;8:176.	E	TA												X
1635	Haddy N, Sass C, Droesch S, Zaiou M, Siest G, Ponthieux A, et al. IL-6, TNF-alpha and atherosclerosis risk indicators in a healthy family population: the STANISLAS cohort. Atherosclerosis 2003;170(2):277-83.	E	TA												X
1636	Haddy N, Sass C, Maumus S, Marie B, Droesch S, Siest G, et al. Biological variations, genetic polymorphisms and familial resemblance of TNF-alpha and IL-6 concentrations: STANISLAS cohort. Eur J Hum Genet 2005;13(1):109-17.	E	TA												X
1637	Hadj-Rabia S, Callewaert BL, Bourrat E, Kempers M, Plomp AS, Layet V, et al. Twenty patients including 7 probands with autosomal dominant cutis laxa confirm clinical and molecular homogeneity. Orphanet Journal of Rare Diseases 2013;8.	E	TA												X
1638	Hagger-Johnson G, Mottus R, Craig LC, Starr JM, Deary IJ. Pathways from childhood intelligence and socioeconomic status to late-life cardiovascular disease risk. Health Psychol 2012;31(4):403-12.	E	F												X
1639	Haghighi A, Schwartz DH, Abrahamowicz M, Leonard GT, Perron M, Richer L, et al. Prenatal exposure to maternal cigarette smoking, amygdala volume, and fat intake in adolescence. JAMA Psychiatry 2013;70(1):98-105.	E	TA												X
1640	Hahn S, Haselhorst U, Tan S, Quadbeck B, Schmidt M, Roesler S, et al. Low serum 25-hydroxyvitamin D concentrations are associated with insulin resistance and obesity in women with polycystic ovary syndrome. Exp Clin Endocrinol Diabetes 2006;114(10):577-83.	E	TA												X
1641	Haider G, Kumar S, Salam B, Masood N, Jamal A, Rasheed YA. Determination of complication rate of PICC lines in Oncological Patients. JPMA Journal of the Pakistan Medical Association 2009;59(10):663-667.	E	TA												X
1642	Hairston KG, Bryer-Ash M, Norris JM, Haffner S, Bowden DW, Wagenknecht LE. Sleep duration and five-year abdominal fat accumulation in a minority cohort: The IRAS family study. Sleep 2010;33(3):289-295.	E	TA												X
1643	Hajat C, Shather Z. Prevalence of metabolic syndrome and prediction of diabetes using IDF versus ATPIII criteria in a Middle East population. Diabetes Res Clin Pract 2012;98(3):481-6.	E	TA												X
1644	Hakanen M, Raitakari OT, Lehtimaki T, Peltonen N, Pahkala K, Sillanmaki L, et al. FTO genotype is associated with body mass index after the age of seven years but not with energy intake or leisure-time physical activity. J Clin Endocrinol Metab 2009;94(4):1281-7.	E	TA												X
1645	Hakeam HA, O'Regan PJ, Salem AM, Bamehriz FY, Jomaa LF. Inhibition of C-reactive protein in morbidly obese patients after laparoscopic sleeve gastrectomy. Obes Surg 2009;19(4):456-60.	E	TA												X
1646	Halanych JH, Safford MM, Kertesz SG, Pletcher MJ, Kim Y-I, Person SD, et al. Alcohol Consumption in Young Adults and Incident Hypertension: 20-Year Follow-up From the Coronary Artery Risk Development in Young Adults Study. American Journal of Epidemiology 2010;171(5):532-539.	E	TA												X
1647	Hall D, Mayosi BM, Rahman TJ, Avery PJ, Watkins HC, Keavney B. Common variation in the CD36 (fatty acid translocase) gene is associated with left-ventricular mass. Journal of Hypertension 2011;29(4):690-695.	E	TA												X
1648	Hall DH, Rahman T, Avery PJ, Keavney B. INSIG-2 promoter polymorphism and obesity related phenotypes: Association study in 1428 members of 248 families. BMC Medical Genetics 2006;7.	E	TA												X
1649	Hall GC, Brown MM, Mo J, MacRae KD. Triptans in migraine: The risks of stroke, cardiovascular disease, and death in practice. Neurology 2004;62(4):563-568.	E	TA												X
1650	Hall WL. Dietary saturated and unsaturated fats as determinants of blood pressure and vascular function. Nutrition Research Reviews 2009;22(1):18-38.	E	TA												X
1651	Hall YN, Hsu CY, Iribarren C, Darbinian J, McCulloch CE, Go AS. The conundrum of increased burden of end-stage renal disease in Asians. Kidney Int 2005;68(5):2310-6.	E	TA												X
1652	Hallan SI, Matsushita K, Sang Y, Mahmoodi BK, Black C, Ishani A, et al. Age and association of kidney measures with mortality and end-stage renal disease. JAMA 2012;308(22):2349-60.	E	TA												X
1653	Hallas J, Bjerrum L, Støvring H, Andersen M. Use of a prescribed ephedrine/caffeine combination and the risk of serious cardiovascular events: A registry-based case-crossover study. American Journal of Epidemiology 2008;168(8):966-973.	E	TA												X
1654	Halldorsson TI, Gunnarsdottir I, Birgisdottir BE, Gudnason V, Aspelund T, Thorsdottir I. Childhood growth and adult hypertension in a population of high birth weight. Hypertension 2011;58(1):8-15.	E	F												X	Exposure change overtime
1655	Halldorsson TI, Thorsdottir I, Meltzer HM, Nielsen F, Olsen SF. Linking exposure to polychlorinated biphenyls with fatty fish consumption and reduced fetal growth among Danish pregnant women: a cause for concern? Am J Epidemiol 2008;168(8):958-65.	E	TA												X
1656	Halldorsson TI, Thorsdottir I, Meltzer HM, Strom M, Olsen SF. Dioxin-like activity in plasma among Danish pregnant women: dietary predictors, birth weight and infant development. Environ Res 2009;109(1):22-8.	E	TA												X
1657	Halley Castillo E, Borges G, Talavera JO, Orozco R, Vargas-Aleman C, Huitron-Bravo G, et al. Body mass index and the prevalence of metabolic syndrome among children and adolescents in two Mexican populations. J Adolesc Health 2007;40(6):521-6.	E	TA		X										X
1658	Hallman DM, Srinivasan SR, Chen W, Boerwinkle E, Berenson GS. Longitudinal analysis of haplotypes and polymorphisms of the APOA5 and APOC3 genes associated with variation in serum triglyceride levels: the Bogalusa Heart Study. Metabolism 2006;55(12):1574-81.	E	TA												X
1659	Hallman DM, Srinivasan SR, Chen W, Boerwinkle E, Berenson GS. The beta(2)-adrenergic receptor Arg16-gly polymorphism and interactions involving beta(2)- and beta(3)-adrenergic receptor polymorphisms are associated with variations in longitudinal serum lipid profiles: the Bogalusa Heart Study. Metabolism 2004;53(9):1184-91.	E	TA												X
1660	Halloran DR, Wall TC, Guild C, Caughey AB. Effect of revised IOM weight gain guidelines on perinatal outcomes. J Matern Fetal Neonatal Med 2011;24(3):397-401.	E	TA												X
1661	Halperin IJ, Kumar SS, Stroup DF, Laredo SE. The association between the combined oral contraceptive pill and insulin resistance, dysglycemia and dyslipidemia in women with polycystic ovary syndrome: a systematic review and meta-analysis of observational studies. Hum Reprod 2011;26(1):191-201.	E	TA												X
1662	Halstead LS, Groah SL, Libin A, Hamm LF, Priestley L. The effects of an anabolic agent on body composition and pulmonary function in tetraplegia: a pilot study. Spinal Cord 2010;48(1):55-9.	E	TA												X
1663	Hamburg NM, Palmisano J, Larson MG, Sullivan LM, Lehman BT, Vasan RS, et al. Relation of Brachial and Digital Measures of Vascular Function in the Community The Framingham Heart Study. Hypertension 2011;57(3):390-U81.	E	TA												X
1664	Hamilton MA, Nonas C, Noll S. The life stages of weight: Setting achievable goals appropriate to each woman. International Journal of Fertility and Women's Medicine 2000;45(1):5-12.	E	TA												X
1665	Hamnvik O-PR, Liu X, Petrou M, Gong H, Chamberland JP, Kim EH, et al. Soluble leptin receptor and leptin are associated with baseline adiposity and metabolic risk factors, and predict adiposity, metabolic syndrome, and glucose levels at 2-year follow-up: the Cyprus Metabolism Prospective Cohort Study. Metabolism-Clinical and Experimental 2011;60(7):987-993.	E	TA												X
1666	Hampson SE, Edmonds GW, Goldberg LR, Dubanoski JP, Hillier TA. Childhood conscientiousness relates to objectively measured adult physical health four decades later. Health Psychol 2013;32(8):925-8.	E	TA												X
1667	Hampson SE, Tonstad S, Irgens LM, Meltzer HM, Vollrath ME. Mothers' negative affectivity during pregnancy and food choices for their infants. Int J Obes (Lond) 2010;34(2):327-31.	E	TA												X
1668	Hamre HJ, Witt CM, Glockmann A, Troeger W, Willich SN, Kiene H. Use and safety of anthroposophic medications in chronic disease - A 2-year prospective analysis. Drug Safety 2006;29(12):1173-1189.	E	TA												X
1669	Han TS, Conway GS, Willis DS, Krone N, Rees DA, Stimson RH, et al. Relationship between final height and health outcomes in adults with congenital adrenal hyperplasia: United Kingdom congenital adrenal hyperplasia adult study executive (CaHASE). J Clin Endocrinol Metab 2014;99(8):E1547-55.	E	TA												X
1670	Hancock RL, Tylavsky FA, Moore R, Anderson JJ. Hereditary and environmental influences on blood pressure values of premenopausal women and their college-age daughters. J Am Coll Nutr 1991;10(4):376-82.	E	TA												X
1671	Hancox RJ, Milne BJ, Poulton R. Association between child and adolescent television viewing and adult health: a longitudinal birth cohort study. Lancet 2004;364(9430):257-62.	E	F												X
1672	Hanifah RA, Mohamed MNA, Jaafar Z, Mohsein NASA, Jalaludin MY, Majid HA, et al. The correlates of body composition with heart rate recovery after step test: An exploratory study of Malaysian adolescents. PLoS ONE 2013;8(12).	E	TA												X
1673	Hannon PA, Bowen DJ, Moinpour CM, McLerran DF. Correlations in perceived food use between the family food preparer and their spouses and children. Appetite 2003;40(1):77-83.	E	TA												X
1674	Hannon TS, Janosky J, Arslanian SA. Longitudinal study of physiologic insulin resistance and metabolic changes of puberty. Pediatr Res 2006;60(6):759-63.	E	TA												X
1675	Hannoush H, Sachdev V, Brofferio A, Arai AE, LaRocca G, Sapp J, et al. Myocardial Fat Overgrowth in Proteus Syndrome. American Journal of Medical Genetics Part A 2015;167A(1):103-110.	E	TA												X
1676	Hansen ML, Gunn PW, Kaelber DC. Underdiagnosis of hypertension in children and adolescents. Journal of the American Medical Association 2007;298(8):874-879.	E	TA												X
1677	Hansen RB, Jacobsen S. Infections Increase Risk of Arterial and Venous Thromboses in Danish Patients with Systemic Lupus Erythematosus: 5102 Patient-years of Followup. Journal of Rheumatology 2014;41(9):1817-1822.	E	TA												X
1678	Hansmann G, Plouffe BD, Hatch A, von Gise A, Sallmon H, Zamanian RT, et al. Design and validation of an endothelial progenitor cell capture chip and its application in patients with pulmonary arterial hypertension. J Mol Med (Berl) 2011;89(10):971-83.	E	TA												X
[truncated: 3,180 more rows]
